# Supplementary material for: One-pot synthesis of 1-arylmethyl-4-[(E)-alk-1-enyl]-1H-1,2,3-triazoles via a cross-coupling/click reaction sequence
Source: Royal Society of Chemistry journal article supplement (doi:10.1039/c3ra45718d), 2013-11-21

# One-Pot Synthesis of 1-Arylmethyl-4-[(*E*)-alk-1-enyl]-1*H*- 1,2,3-triazoles via a Cross-Coupling/Click Reaction Sequence

Masayuki Hoshi\*, Mitsuhiro Okimoto, Asuka Oikawa, Shunsuke Miyawaki,  
Yasutaka Shimotori

Department of Biotechnology and Environmental Chemistry, Kitami Institute of Technology,  
165 Koen-cho, Kitami, Hokkaido 090-8507, Japan

E-mail: [hoshi-m@chem.kitami-it.ac.jp](mailto:hoshi-m@chem.kitami-it.ac.jp)

| Contents                                                                    | Page |
|-----------------------------------------------------------------------------|------|
| 1 General information                                                       | 1-2  |
| 2 General experimental procedure                                            | 2    |
| 3 Characterization data of the products                                     | 2-8  |
| 4 Copies of <sup>1</sup> H and <sup>13</sup> C NMR spectra for the products | 9-33 |

## 1 General information

NMR spectra were recorded on JEOL JNM-A-500 or JEOL JNM-ECA-600 spectrometers. Chemical shifts are quoted in parts per million (ppm) downfield of TMS. Coupling constants *J* are quoted in Hz. IR spectra were recorded on a Shimadzu FT-IR 8300 spectrometer, and only the strongest/structurally most important absorption peaks are listed. Electrospray ionization (ESI) HRMS analyses were measured on a Thermo Scientific Exactive instrument. Melting points were determined on a Yamato MP-21 and are uncorrected. TLC analyses were carried out using aluminum sheets pre-coated with silica gel 60 F<sub>254</sub> purchased from Merck. Product purification was performed by column chromatography using silica gel 60 (Kanto Chemical, 63-210 μm). All reactions were carried out under an argon atmosphere. Unless otherwise noted, commercially available materials were used without any purification. Alk-1-yne, 2-methylbut-2-ene, and Et<sub>3</sub>N were used after distillation over CaH<sub>2</sub> under argon. THF was distilled from Na-benzophenone ketyl under argon before use. Borane dimethyl sulfide complex (BH<sub>3</sub>·SMe<sub>2</sub>) was purchased from Aldrich. (Trimethylsilyl)ethynyl bromide was

prepared according to the literature procedure.<sup>1</sup>

## 2 General experimental procedure

To a solution of  $\text{BH}_3 \cdot \text{SMe}_2$  (1 mmol) in THF (3 mL) was added 2-methylbut-2-ene (0.14 g, 2 mmol) dropwise at  $-15\text{ }^\circ\text{C}$  under argon, and the reaction mixture was stirred for 2 h at r.t. to form a solution of disiamylborane in THF.<sup>2</sup> To this solution was added alk-1-yne (1 mmol) dropwise at  $-15\text{ }^\circ\text{C}$ , and the mixture was stirred for 2 h at  $0\text{ }^\circ\text{C}$ . A solution of (*E*)-alk-1-enyldisiamylborane **1** (1 mmol) in THF, thus prepared, was cooled to  $-15\text{ }^\circ\text{C}$ , and  $\text{Cu}(\text{acac})_2$  (0.013 g, 0.05 mmol) was added to the solution under a flow of argon, followed by dropwise addition of (trimethylsilyl)ethynyl bromide (0.119 g, 0.67 mmol) and NaOMe (1M, 0.75 mL, 0.75 mmol). The resulting mixture was allowed to warm gradually to r.t. and stirred overnight. The solvents (THF and MeOH) were removed under reduced pressure, and acetone (2 mL) and water (1 mL) were added to the residue under argon. To the resulting mixture including (*E*)-alk-3-en-1-yne **2** were added successively (+)-sodium L-ascorbate (0.02 g, 0.1 mmol) and sodium azide (0.033 g, 0.5 mmol) under a flow of argon, followed by dropwise addition of benzyl bromide (0.086 g, 0.5 mmol). The resultant mixture was stirred at r.t. for 24 h and then treated with 3M NaOH (1 mL) and 30%  $\text{H}_2\text{O}_2$  (0.5 mL) at  $0\text{ }^\circ\text{C}$  for 1 h or by bubbling air through the solution with tube pump at r.t. for 2 h to oxidize the residual organoboron compound. The mixture was extracted with EtOAc ( $3 \times 10\text{ mL}$ ), washed with brine (10 mL), dried ( $\text{Na}_2\text{SO}_4$ ), and filtered. The solvent was evaporated under reduced pressure and the residue was purified by column chromatography on silica gel to give product **3**.

## References

1. Hofmeister, H.; Annen, K.; Laurent, H.; Wiechert, R. *Angew. Chem. Int. Ed. Engl.* **1984**, *23*, 727.
2. Brown, H. C.; Mandal, A. K.; Kulkarni, S. U. *J. Org. Chem.* **1977**, *42*, 1392.

## 2 Characterization data of the products

### 1-benzyl-4-[(*E*)-oct-1-enyl]-1*H*-1,2,3-triazole (**3aa**)

White solid. Eluent: hexane-EtOAc (7:3); mp  $66\text{--}67\text{ }^\circ\text{C}$ .  $^1\text{H}$  NMR (500 MHz,  $\text{CDCl}_3$ ):  $\delta$  = 0.87 (t,  $J$  = 6.8 Hz, 3H), 1.23–1.35 (m, 6H), 1.38–1.47 (m, 2H), 2.14–2.19 (m, 2H), 5.46 (s, 2H), 6.32–6.40 (m, 2H), 7.23–7.26 (m, 2H), 7.31–7.37 (m, 3H), 7.35 (s, 1H).  $^{13}\text{C}$  NMR (125 MHz,  $\text{CDCl}_3$ ):  $\delta$  = 13.9 ( $\text{CH}_3$ ), 22.4 ( $\text{CH}_2$ ), 28.6 ( $\text{CH}_2$ ), 28.8 ( $\text{CH}_2$ ), 31.5 ( $\text{CH}_2$ ), 32.7 ( $\text{CH}_2$ ), 53.8 ( $\text{CH}_2$ ), 118.0 (=CH), 119.1 (=CH), 127.8 ( $2 \times \text{CH}_{\text{arom}}$ ), 128.4 ( $\text{CH}_{\text{arom}}$ ), 128.8 ( $2 \times \text{CH}_{\text{arom}}$ ), 133.5 (=CH), 134.6 ( $\text{C}_{\text{arom}}$ ), 146.7 (=C). IR (neat): 3033, 2923, 2854, 1454, 1222, 1049, 964, 761, 698  $\text{cm}^{-1}$ . HRMS(ESI):  $m/z$  [ $\text{M} + \text{Na}$ ]<sup>+</sup> calcd for  $\text{C}_{17}\text{H}_{23}\text{N}_3\text{Na}$ : 292.1790; found: 292.1787.

### 1-Benzyl-4-[(*E*)-2-phenylethenyl]-1*H*-1,2,3-triazole (**3ba**)

White solid. Eluent: hexane-EtOAc (7:3); mp  $141\text{--}143\text{ }^\circ\text{C}$ .  $^1\text{H}$  NMR (500 MHz,  $\text{CDCl}_3$ ):  $\delta$  = 5.46 (s,

2H), 7.05 (d,  $J = 16.1$  Hz, 1H), 7.21–7.36 (m, 9H), 7.42–7.46 (m, 2H), 7.51 (s, 1H).  $^{13}\text{C}$  NMR (125 MHz,  $\text{CDCl}_3$ ):  $\delta = 53.9$  ( $\text{CH}_2$ ), 116.5 ( $=\text{CH}$ ), 126.2 ( $2 \times \text{CH}_{\text{arom}}$ ), 127.7 ( $\text{CH}_{\text{arom}}$ ), 127.8 ( $2 \times \text{CH}_{\text{arom}}$ ), 128.5 ( $2 \times \text{CH}_{\text{arom}}$ ), 128.6 ( $\text{CH}_{\text{arom}}$ ), 128.9 ( $2 \times \text{CH}_{\text{arom}}$ ), 130.4 ( $=\text{CH}$ ), 134.4 ( $\text{C}_{\text{arom}}$ ), 136.5 ( $\text{C}_{\text{arom}}$ ). IR (KBr): 1494, 1454, 1434, 1355, 1218, 1045, 970, 796, 758, 705, 692, 650  $\text{cm}^{-1}$ . HRMS(ESI):  $m/z$  [ $\text{M} + \text{Na}$ ] $^+$  calcd for  $\text{C}_{17}\text{H}_{15}\text{N}_3\text{Na}$ : 284.1164; found: 284.1160.

#### **1-Benzyl-4-[(E)-5-chloropent-1-enyl]-1H-1,2,3-triazole (3ca)**

White solid. Eluent: hexane-EtOAc (7:3); mp 43–45 °C.  $^1\text{H}$  NMR (500 MHz,  $\text{CDCl}_3$ ):  $\delta = 1.87$ – $1.95$  (m, 2H), 2.30–2.38 (m, 2H), 3.55 (t,  $J = 6.3$  Hz, 2H), 5.48 (s, 2H), 6.30–6.47 (m, 2H), 7.23–7.28 (m, 2H), 7.32–7.39 (m, 4H).  $^{13}\text{C}$  NMR (125 MHz,  $\text{CDCl}_3$ ):  $\delta = 29.8$  ( $\text{CH}_2$ ), 31.6 ( $\text{CH}_2$ ), 44.2 ( $\text{CH}_2$ ), 54.0 ( $\text{CH}_2$ ), 119.5 ( $=\text{CH}$ ), 119.6 ( $=\text{CH}$ ), 127.9 ( $2 \times \text{CH}_{\text{arom}}$ ), 128.6 ( $\text{CH}_{\text{arom}}$ ), 129.0 ( $2 \times \text{CH}_{\text{arom}}$ ), 131.2 ( $=\text{CH}$ ), 134.7 ( $\text{C}_{\text{arom}}$ ), 146.3 ( $=\text{C}$ ). IR (KBr): 3120, 3035, 2952, 1496, 1454, 1311, 1218, 1047, 968, 754, 711, 650  $\text{cm}^{-1}$ . HRMS(ESI):  $m/z$  [ $\text{M} + \text{Na}$ ] $^+$  calcd for  $\text{C}_{14}\text{H}_{16}\text{ClN}_3\text{Na}$ : 284.0930; found: 284.0928.

#### **1-Benzyl-4-[(E)-2-(cyclohex-1-enyl)ethenyl]-1H-1,2,3-triazole (3da)**

Yellowish white solid. Eluent: hexane-EtOAc (7:3); mp 70–72 °C.  $^1\text{H}$  NMR (500 MHz,  $\text{CDCl}_3$ ):  $\delta = 1.57$ – $1.72$  (m, 4H), 2.12–2.22 (m, 4H), 5.48 (s, 2H), 5.85 (br s, 1H), 6.39 (d,  $J = 16.1$  Hz, 1H), 6.87 (d,  $J = 16.1$  Hz, 1H), 7.23–7.27 (m, 2H), 7.32–7.37 (m, 3H), 7.40 (s, 1H).  $^{13}\text{C}$  NMR (125 MHz,  $\text{CDCl}_3$ ):  $\delta = 22.2$  ( $\text{CH}_2$ ), 22.3 ( $\text{CH}_2$ ), 24.0 ( $\text{CH}_2$ ), 25.9 ( $\text{CH}_2$ ), 53.8 ( $\text{CH}_2$ ), 112.8 ( $=\text{CH}$ ), 119.4 ( $=\text{CH}$ ), 127.8 ( $2 \times \text{CH}_{\text{arom}}$ ), 128.5 ( $\text{CH}_{\text{arom}}$ ), 128.9 ( $2 \times \text{CH}_{\text{arom}}$ ), 131.3 ( $=\text{CH}$ ), 134.4 ( $=\text{CH}$ ), 134.6 ( $\text{C}_{\text{arom}}$ ), 135.2 ( $=\text{C}$ ), 147.1 ( $=\text{C}$ ). IR (KBr): 3134, 3039, 2929, 2858, 1496, 1454, 1434, 1353, 1226, 1049, 960, 794, 761, 719, 692  $\text{cm}^{-1}$ . HRMS(ESI):  $m/z$  [ $\text{M} + \text{Na}$ ] $^+$  calcd for  $\text{C}_{17}\text{H}_{19}\text{N}_3\text{Na}$ : 288.1477; found: 288.1475.

#### **1-(2-Methylbenzyl)-4-[(E)-oct-1-enyl]-1H-1,2,3-triazole (3ab)**

Light-brown solid. Eluent: hexane-EtOAc (7:3); mp 68–69 °C.  $^1\text{H}$  NMR (500 MHz,  $\text{CDCl}_3$ ):  $\delta = 0.87$  (t,  $J = 6.8$  Hz, 3H), 1.22–1.35 (m, 6H), 1.38–1.47 (m, 2H), 2.13–2.19 (m, 2H), 2.27 (s, 3H), 5.49 (s, 2H), 6.30–6.40 (m, 2H), 7.12–7.16 (m, 1H), 7.19–7.30 (m, 4H).  $^{13}\text{C}$  NMR (125 MHz,  $\text{CDCl}_3$ ):  $\delta = 13.9$  ( $\text{CH}_3$ ), 18.8 ( $\text{CH}_3$ ), 22.4 ( $\text{CH}_2$ ), 28.7 ( $\text{CH}_2$ ), 28.8 ( $\text{CH}_2$ ), 31.5 ( $\text{CH}_2$ ), 32.7 ( $\text{CH}_2$ ), 52.1 ( $\text{CH}_2$ ), 118.1 ( $=\text{CH}$ ), 126.4 ( $\text{CH}_{\text{arom}}$ ), 128.9 ( $\text{CH}_{\text{arom}}$ ), 129.1 ( $\text{CH}_{\text{arom}}$ ), 130.8 ( $\text{CH}_{\text{arom}}$ ), 132.5 ( $\text{C}_{\text{arom}}$ ), 133.5 ( $\text{C}_{\text{arom}}$ ), 136.7 ( $=\text{CH}$ ). IR (KBr): 3116, 3053, 2929, 2854, 1460, 1211, 1041, 974, 786, 761  $\text{cm}^{-1}$ . HRMS(ESI):  $m/z$  [ $\text{M} + \text{Na}$ ] $^+$  calcd for  $\text{C}_{18}\text{H}_{25}\text{N}_3\text{Na}$ : 306.1946; found: 306.1942.

#### **1-(4-Methylbenzyl)-4-[(E)-oct-1-enyl]-1H-1,2,3-triazole (3ac)**

Crystalline white solid. Eluent: hexane-EtOAc (7:3); mp 75–76 °C.  $^1\text{H}$  NMR (500 MHz,  $\text{CDCl}_3$ ):  $\delta = 0.87$  (t,  $J = 6.8$  Hz, 3H), 1.22–1.35 (m, 6H), 1.38–1.46 (m, 2H), 2.12–2.19 (m, 2H), 2.32 (s, 3H), 5.40 (s, 2H), 6.30–6.39 (m, 2H), 7.14 (s, 4H), 7.35 (s, 1H).  $^{13}\text{C}$  NMR (125 MHz,  $\text{CDCl}_3$ ):  $\delta = 14.1$  ( $\text{CH}_3$ ),

21.1 (CH<sub>3</sub>), 22.6 (CH<sub>2</sub>), 28.8 (CH<sub>2</sub>), 29.0 (CH<sub>2</sub>), 31.7 (CH<sub>2</sub>), 32.8 (CH<sub>2</sub>), 53.7 (CH<sub>2</sub>), 118.3 (=CH), 119.3 (=CH), 128.0 (2 × CH<sub>arom</sub>), 129.6 (2 × CH<sub>arom</sub>), 131.8 (C<sub>arom</sub>), 133.5 (=CH), 138.4 (C<sub>arom</sub>), 146.7 (=C). IR (KBr): 3105, 2952, 2850, 1454, 1218, 964, 796, 758 cm<sup>-1</sup>. HRMS(ESI): *m/z* [M + Na]<sup>+</sup> calcd for C<sub>18</sub>H<sub>25</sub>N<sub>3</sub>Na: 306.1946; found: 306.1945.

#### **1-[4-(Trifluoromethyl)benzyl]-4-[(*E*)-oct-1-enyl]-1*H*-1,2,3-triazole (3ad)**

White solid. Eluent: hexane-EtOAc (7:3); mp 77–78 °C. <sup>1</sup>H NMR (500 MHz, CDCl<sub>3</sub>): δ = 0.88 (t, *J* = 6.8 Hz, 3H), 1.22–1.49 (m, 8H), 2.14–2.23 (m, 2H), 5.56 (s, 2H), 6.37 (d, *J* = 16.1 Hz, 1H), 6.41 (dt, *J* = 16.1, 6.3 Hz, 1H), 7.36 (d, *J* = 7.8 Hz, 2H), 7.45 (s, 1H), 7.61 (d, *J* = 7.8 Hz, 2H). <sup>13</sup>C NMR (125 MHz, CDCl<sub>3</sub>): δ = 14.1 (CH<sub>3</sub>), 22.6 (CH<sub>2</sub>), 28.8 (CH<sub>2</sub>), 28.9 (CH<sub>2</sub>), 31.7 (CH<sub>2</sub>), 32.9 (CH<sub>2</sub>), 53.3 (CH<sub>2</sub>), 117.9 (=CH), 119.6 (=CH), 123.3 (CF<sub>3</sub>, *q*, *J* = 272.1 Hz), 126.0 (2 × CH<sub>arom</sub>, *q*, *J* = 4.1 Hz), 128.1 (2 × CH<sub>arom</sub>), 130.9 (C<sub>arom</sub>, *q*, *J* = 32.1 Hz), 134.3 (=CH), 138.8 (C<sub>arom</sub>), 147.1 (=C). IR (KBr): 3010, 2927, 2858, 1456, 1419, 1328, 1163, 1120, 1109, 1070, 964, 823 cm<sup>-1</sup>. HRMS(ESI): *m/z* [M + Na]<sup>+</sup> calcd for C<sub>18</sub>H<sub>22</sub>N<sub>3</sub>F<sub>3</sub>Na: 360.1663; found: 360.1660.

#### **1-(4-Chlorobenzyl)-4-[(*E*)-oct-1-enyl]-1*H*-1,2,3-triazole (3ae)**

Crystalline white solid. Eluent: hexane-EtOAc (7:3); mp 76–77 °C. <sup>1</sup>H NMR (500 MHz, CDCl<sub>3</sub>): δ = 0.88 (t, *J* = 6.8 Hz, 3H), 1.22–1.36 (m, 6H), 1.39–1.47 (m, 2H), 2.14–2.21 (m, 2H), 5.45 (s, 2H), 6.35 (d, *J* = 16.1 Hz, 1H), 6.37 (dt, *J* = 16.1, 6.3 Hz, 1H), 7.17–7.21 (m, 2H), 7.30–7.34 (m, 2H), 7.36 (s, 1H). <sup>13</sup>C NMR (125 MHz, CDCl<sub>3</sub>): δ = 14.1 (CH<sub>3</sub>), 22.6 (CH<sub>2</sub>), 28.8 (CH<sub>2</sub>), 28.9 (CH<sub>2</sub>), 31.7 (CH<sub>2</sub>), 32.9 (CH<sub>2</sub>), 53.2 (CH<sub>2</sub>), 118.0 (=CH), 119.2 (=CH), 129.2 (2 × CH<sub>arom</sub>), 129.3 (2 × CH<sub>arom</sub>), 133.3 (C<sub>arom</sub>), 134.0 (=CH), 134.6 (C<sub>arom</sub>), 147.0 (=C). IR (KBr): 3103, 3051, 2952, 2929, 2850, 1494, 1454, 1218, 962, 796, 758 cm<sup>-1</sup>. HRMS(ESI): *m/z* [M + Na]<sup>+</sup> calcd for C<sub>17</sub>H<sub>22</sub>N<sub>3</sub>ClNa: 326.1400; found: 326.1399.

#### **1-(4-Bromobenzyl)-4-[(*E*)-oct-1-enyl]-1*H*-1,2,3-triazole (3af)**

White solid. Eluent: hexane-EtOAc (7:3); mp 73–74 °C. <sup>1</sup>H NMR (500 MHz, CDCl<sub>3</sub>): δ = 0.88 (t, *J* = 6.8 Hz, 3H), 1.22–1.36 (m, 6H), 1.39–1.47 (m, 2H), 2.14–2.21 (m, 2H), 5.44 (s, 2H), 6.35 (d, *J* = 16.1 Hz, 1H), 6.38 (dt, *J* = 16.1, 6.3 Hz, 1H), 7.10–7.15 (m, 2H), 7.39 (s, 1H), 7.45–7.50 (m, 2H). <sup>13</sup>C NMR (125 MHz, CDCl<sub>3</sub>): δ = 14.1 (CH<sub>3</sub>), 22.6 (CH<sub>2</sub>), 28.8 (CH<sub>2</sub>), 28.9 (CH<sub>2</sub>), 31.6 (CH<sub>2</sub>), 32.9 (CH<sub>2</sub>), 53.3 (CH<sub>2</sub>), 117.9 (=CH), 119.3 (=CH), 122.7 (C<sub>arom</sub>), 129.5 (2 × CH<sub>arom</sub>), 132.1 (2 × CH<sub>arom</sub>), 133.8 (C<sub>arom</sub>), 134.2 (=CH), 146.9 (=C). IR (KBr): 3103, 2950, 2929, 2852, 1488, 1456, 1409, 1222, 1055, 1012, 962, 792 cm<sup>-1</sup>. HRMS(ESI): *m/z* [M + Na]<sup>+</sup> calcd for C<sub>17</sub>H<sub>22</sub>N<sub>3</sub>BrNa: 370.0895; found: 370.0894.

#### **1-(4-Cyanobenzyl)-4-[(*E*)-oct-1-enyl]-1*H*-1,2,3-triazole (3ag)**

White solid. Eluent: hexane-EtOAc (7:3); mp 94–95 °C. <sup>1</sup>H NMR (500 MHz, CDCl<sub>3</sub>): δ = 0.88 (t, *J* =



6.8 Hz, 3H), 1.23–1.37 (m, 6H), 1.40–1.48 (m, 2H), 2.15–2.22 (m, 2H), 5.58 (s, 2H), 6.36 (d,  $J = 16.1$  Hz, 1H), 6.39 (dt,  $J = 16.1$ , 6.8 Hz, 1H), 7.32–7.36 (m, 2H), 7.45 (s, 1H), 7.62–7.66 (m, 2H).  $^{13}\text{C}$  NMR (125 MHz,  $\text{CDCl}_3$ ):  $\delta = 14.1$  ( $\text{CH}_3$ ), 22.5 ( $\text{CH}_2$ ), 28.8 ( $\text{CH}_2$ ), 28.9 ( $\text{CH}_2$ ), 31.6 ( $\text{CH}_2$ ), 32.9 ( $\text{CH}_2$ ), 53.2 ( $\text{CH}_2$ ), 112.5 ( $=\text{C}$ ), 117.8 ( $=\text{CH}$ ), 118.2 ( $\text{C}_{\text{arom}}$ ), 119.6 ( $=\text{CH}$ ), 128.3 ( $2 \times \text{CH}_{\text{arom}}$ ), 132.8 ( $2 \times \text{CH}_{\text{arom}}$ ), 134.4 ( $=\text{CH}$ ), 140.1 ( $\text{C}_{\text{arom}}$ ), 147.2 ( $=\text{C}$ ). IR (KBr): 3093, 3051, 2952, 2920, 2850, 2231, 1419, 1340, 1220, 1053, 1033, 968, 812, 761  $\text{cm}^{-1}$ . HRMS(ESI):  $m/z$  [ $\text{M} + \text{Na}$ ] $^+$  calcd for  $\text{C}_{18}\text{H}_{22}\text{N}_4\text{Na}$ : 317.1742; found: 317.1743.

#### **1-(4-Methoxycarbonylbenzyl)-4-[(E)-oct-1-enyl]-1H-1,2,3-triazole (3ah)**

Light-brown solid. Eluent: hexane-EtOAc (7:3); mp 105–107 °C.  $^1\text{H}$  NMR (500 MHz,  $\text{CDCl}_3$ ):  $\delta = 0.88$  (t,  $J = 6.9$  Hz, 3H), 1.23–1.36 (m, 6H), 1.41–1.47 (m, 2H), 2.16–2.21 (m, 2H), 3.90 (s, 3H), 5.56 (s, 2H), 6.36 (d,  $J = 16.5$  Hz, 1H), 6.36–6.43 (m, 1H), 7.30 (d,  $J = 8.2$  Hz, 2H), 7.37 (s, 1H), 8.03 (d,  $J = 8.2$  Hz, 2H).  $^{13}\text{C}$  NMR (125 MHz,  $\text{CDCl}_3$ ):  $\delta = 14.1$  ( $\text{CH}_3$ ), 22.6 ( $\text{CH}_2$ ), 28.8 ( $\text{CH}_2$ ), 28.9 ( $\text{CH}_2$ ), 31.7 ( $\text{CH}_2$ ), 32.9 ( $\text{CH}_2$ ), 52.2 ( $\text{CH}_3$ ), 53.4 ( $\text{CH}_2$ ), 118.0 ( $=\text{CH}$ ), 119.6 ( $=\text{CH}$ ), 127.7 ( $2 \times \text{CH}_{\text{arom}}$ ), 130.2 ( $2 \times \text{CH}_{\text{arom}}$ ), 130.3 ( $\text{C}_{\text{arom}}$ ), 134.0 ( $=\text{CH}$ ), 139.8 ( $\text{C}_{\text{arom}}$ ), 147.0 ( $=\text{C}$ ), 166.3 ( $\text{O}=\text{C}$ ). IR (KBr): 2922, 2850, 1724, 1458, 1436, 1280, 1217, 1109, 1055, 960  $\text{cm}^{-1}$ . HRMS(ESI):  $m/z$  [ $\text{M} + \text{Na}$ ] $^+$  calcd for  $\text{C}_{19}\text{H}_{25}\text{N}_3\text{O}_2\text{Na}$ : 350.1844; found: 350.1840.

#### **1-(2-Methylbenzyl)-4-[(E)-2-phenylethenyl]-1H-1,2,3-triazole (3bb)**

White solid. Eluent: hexane-EtOAc (7:3); mp 120–121 °C.  $^1\text{H}$  NMR (500 MHz,  $\text{CDCl}_3$ ):  $\delta = 2.25$  (s, 3H), 5.47 (s, 2H), 7.02 (d,  $J = 16.1$  Hz, 1H), 7.11–7.13 (m, 1H), 7.18–7.32 (m, 7H), 7.36 (s, 1H), 7.41–7.45 (m, 2H).  $^{13}\text{C}$  NMR (125 MHz,  $\text{CDCl}_3$ ):  $\delta = 18.9$  ( $\text{CH}_3$ ), 52.2 ( $\text{CH}_2$ ), 116.7 ( $=\text{CH}$ ), 120.2 ( $=\text{CH}$ ), 126.4 ( $2 \times \text{CH}_{\text{arom}}$ ), 126.6 ( $\text{CH}_{\text{arom}}$ ), 127.8 ( $\text{CH}_{\text{arom}}$ ), 128.6 ( $2 \times \text{CH}_{\text{arom}}$ ), 129.0 ( $\text{CH}_{\text{arom}}$ ), 129.2 ( $\text{CH}_{\text{arom}}$ ), 130.4 ( $=\text{CH}$ ), 130.9 ( $\text{CH}_{\text{arom}}$ ), 132.5 ( $\text{C}_{\text{arom}}$ ), 136.6 ( $\text{C}_{\text{arom}}$ ), 136.8 ( $\text{C}_{\text{arom}}$ ), 146.2 ( $=\text{C}$ ). IR (KBr): 3111, 3028, 1494, 1460, 1265, 1226, 1217, 1049, 960, 835, 773, 740, 731, 705, 690  $\text{cm}^{-1}$ . HRMS(ESI):  $m/z$  [ $\text{M} + \text{Na}$ ] $^+$  calcd for  $\text{C}_{18}\text{H}_{17}\text{N}_3\text{Na}$ : 298.1320; found: 298.1316.

#### **1-(4-Methylbenzyl)-4-[(E)-2-phenylethenyl]-1H-1,2,3-triazole (3bc)**

White solid. Eluent: hexane-EtOAc (7:3); mp 137–138 °C.  $^1\text{H}$  NMR (500 MHz,  $\text{CDCl}_3$ ):  $\delta = 2.34$  (s, 3H), 5.47 (s, 2H), 7.04 (d,  $J = 16.6$  Hz, 1H), 7.18 (s, 4H), 7.22–7.28 (m, 2H), 7.30–7.35 (m, 2H), 7.43–7.48 (m, 3H).  $^{13}\text{C}$  NMR (125 MHz,  $\text{CDCl}_3$ ):  $\delta = 21.2$  ( $\text{CH}_3$ ), 53.9 ( $\text{CH}_2$ ), 116.7 ( $=\text{CH}$ ), 120.1 ( $=\text{CH}$ ), 126.4 ( $2 \times \text{CH}_{\text{arom}}$ ), 127.8 ( $\text{CH}_{\text{arom}}$ ), 128.1 ( $2 \times \text{CH}_{\text{arom}}$ ), 128.6 ( $2 \times \text{CH}_{\text{arom}}$ ), 129.7 ( $2 \times \text{CH}_{\text{arom}}$ ), 130.5 ( $=\text{CH}$ ), 131.5 ( $\text{C}_{\text{arom}}$ ), 136.7 ( $\text{C}_{\text{arom}}$ ), 138.7 ( $\text{C}_{\text{arom}}$ ), 146.5 ( $=\text{C}$ ). IR (KBr): 1458, 1213, 962, 748, 705, 688  $\text{cm}^{-1}$ . HRMS(ESI):  $m/z$  [ $\text{M} + \text{Na}$ ] $^+$  calcd for  $\text{C}_{18}\text{H}_{17}\text{N}_3\text{Na}$ : 298.1320; found: 298.1321.

#### **1-[4-(Trifluoromethyl)benzyl]-4-[(E)-2-phenylethenyl]-1H-1,2,3-triazole (3bd)**

Crystalline colorless solid. Eluent: hexane-EtOAc (7:3); mp 150–151 °C. <sup>1</sup>H NMR (500 MHz, DMSO-*d*<sub>6</sub>): δ = 5.80 (s, 2H), 7.24–7.32 (m, 2H), 7.33–7.42 (m, 3H), 7.54–7.63 (m, 4H), 7.78–7.80 (m, 2H), 8.42 (s, 1H). <sup>13</sup>C NMR (125 MHz, DMSO-*d*<sub>6</sub>): δ = 52.3 (CH<sub>2</sub>), 117.3 (=CH), 122.6 (=CH), 124.2 (CF<sub>3</sub>, q, *J* = 270.4 Hz), 125.7 (2 × CH<sub>arom</sub>, q, *J* = 4.1 Hz), 126.4 (2 × CH<sub>arom</sub>), 127.8 (CH<sub>arom</sub>), 128.6 (2 × CH<sub>arom</sub>), 128.7 (2 × CH<sub>arom</sub>), 128.8 (C<sub>arom</sub>, q, *J* = 32.9 Hz), 129.6 (=CH), 136.6 (C<sub>arom</sub>), 140.7 (C<sub>arom</sub>), 145.6 (=C). IR (KBr): 1419, 1334, 1218, 1170, 1124, 1070, 960, 860, 825, 788, 752, 704, 690 cm<sup>-1</sup>. HRMS(ESI): *m/z* [M + Na]<sup>+</sup> calcd for C<sub>18</sub>H<sub>14</sub>N<sub>3</sub>F<sub>3</sub>Na: 352.1037; found: 352.1035.

#### **1-(4-Chlorobenzyl)-4-[(*E*)-2-phenylethenyl]-1*H*-1,2,3-triazole (3be)**

White solid. Eluent: hexane-EtOAc (7:3); mp 151–152 °C. <sup>1</sup>H NMR (500 MHz, CDCl<sub>3</sub>): δ = 5.46 (s, 2H), 7.04 (d, *J* = 16.6 Hz, 1H), 7.17–7.22 (m, 2H), 7.23–7.27 (m, 1H), 7.27 (d, *J* = 16.6 Hz, 1H), 7.30–7.36 (m, 4H), 7.43–7.47 (m, 2H), 7.50 (s, 1H). <sup>13</sup>C NMR (125 MHz, CDCl<sub>3</sub>): δ = 53.3 (CH<sub>2</sub>), 116.4 (=CH), 120.2 (=CH), 126.4 (2 × CH<sub>arom</sub>), 127.9 (CH<sub>arom</sub>), 128.7 (2 × CH<sub>arom</sub>), 129.2 (2 × CH<sub>arom</sub>), 129.3 (2 × CH<sub>arom</sub>), 130.8 (=CH), 133.1 (C<sub>arom</sub>), 134.7 (C<sub>arom</sub>), 136.5 (C<sub>arom</sub>), 146.7 (=C). IR (KBr): 3095, 1488, 1442, 1218, 1055, 960, 785, 746, 705, 690 cm<sup>-1</sup>. HRMS(ESI): *m/z* [M + Na]<sup>+</sup> calcd for C<sub>17</sub>H<sub>14</sub>N<sub>3</sub>ClNa: 318.0774; found: 318.0770.

#### **1-(4-Bromobenzyl)-4-[(*E*)-2-phenylethenyl]-1*H*-1,2,3-triazole (3bf)**

White solid. Eluent: hexane-EtOAc (7:3); mp 163–164 °C. <sup>1</sup>H NMR (500 MHz, DMSO-*d*<sub>6</sub>): δ = 5.62 (s, 2H), 7.21 (d, *J* = 16.1 Hz, 1H), 7.25–7.33 (m, 4H), 7.35–7.40 (m, 2H), 7.56–7.62 (m, 4H), 8.34 (s, 1H). <sup>13</sup>C NMR (125 MHz, DMSO-*d*<sub>6</sub>): δ = 52.0 (CH<sub>2</sub>), 117.2 (=CH), 121.3 (C<sub>arom</sub>), 122.2 (=CH), 126.2 (2 × CH<sub>arom</sub>), 127.7 (CH<sub>arom</sub>), 128.6 (2 × CH<sub>arom</sub>), 129.4 (=CH), 130.1 (2 × CH<sub>arom</sub>), 131.6 (2 × CH<sub>arom</sub>), 135.3 (C<sub>arom</sub>), 136.5 (C<sub>arom</sub>), 145.4 (=C). IR (KBr): 3095, 1488, 1442, 1220, 1159, 1072, 1056, 1012, 958, 785, 744, 705, 690 cm<sup>-1</sup>. HRMS(ESI): *m/z* [M + Na]<sup>+</sup> calcd for C<sub>17</sub>H<sub>14</sub>N<sub>3</sub>BrNa: 362.0269; found: 362.0267.

#### **1-(4-Cyanobenzyl)-4-[(*E*)-2-phenylethenyl]-1*H*-1,2,3-triazole (3bg)**

White solid. Eluent: hexane-EtOAc (7:3); mp 125–127 °C. <sup>1</sup>H NMR (500 MHz, CDCl<sub>3</sub>): δ = 5.58 (s, 2H), 7.05 (d, *J* = 16.6 Hz, 1H), 7.24–7.37 (m, 6H), 7.43–7.48 (m, 2H), 7.61 (s, 1H), 7.61–7.65 (m, 2H). <sup>13</sup>C NMR (125 MHz, CDCl<sub>3</sub>): δ = 53.3 (CH<sub>2</sub>), 112.6 (≡C), 116.0 (=CH), 118.1 (C<sub>arom</sub>), 120.7 (=CH), 126.5 (2 × CH<sub>arom</sub>), 128.1 (CH<sub>arom</sub>), 128.3 (2 × CH<sub>arom</sub>), 128.7 (2 × CH<sub>arom</sub>), 131.3 (=CH), 132.8 (2 × CH<sub>arom</sub>), 136.3 (C<sub>arom</sub>), 139.8 (C<sub>arom</sub>), 146.7 (=C). IR (KBr): 3101, 3045, 2235, 1454, 1442, 1417, 1222, 1053, 1024, 962, 786, 750, 707, 690 cm<sup>-1</sup>. HRMS(ESI): *m/z* [M + Na]<sup>+</sup> calcd for C<sub>18</sub>H<sub>14</sub>N<sub>4</sub>Na: 309.1116; found: 309.1118.

#### **1-(2-Methylbenzyl)-4-[(*E*)-5-chloropent-1-enyl]-1*H*-1,2,3-triazole (3cb)**

White solid. Eluent: hexane-EtOAc (7:3); mp 73–74 °C. <sup>1</sup>H NMR (500 MHz, CDCl<sub>3</sub>): δ = 1.91 (quin, *J* = 6.8 Hz, 2H), 2.28 (s, 3H), 2.32–2.38 (m, 2H), 3.53–3.58 (m, 2H), 5.51 (s, 2H), 6.32–6.42 (m, 2H), 7.14–7.17 (m, 1H), 7.20–7.25 (m, 2H), 7.24 (s, 1H), 7.27–7.32 (m, 1H). <sup>13</sup>C NMR (125 MHz, CDCl<sub>3</sub>): δ = 18.9 (CH<sub>3</sub>), 29.8 (CH<sub>2</sub>), 31.6 (CH<sub>2</sub>), 44.2 (CH<sub>2</sub>), 52.3 (CH<sub>2</sub>), 119.3 (=CH), 119.5 (=CH), 126.6 (CH<sub>arom</sub>), 129.1 (CH<sub>arom</sub>), 129.3 (CH<sub>arom</sub>), 131.0 (CH<sub>arom</sub>), 131.5 (=CH), 132.4 (C<sub>arom</sub>), 136.9 (C<sub>arom</sub>), 145.9 (=C). IR (KBr): 3118, 3057, 1456, 1311, 1213, 1047, 974, 719 cm<sup>-1</sup>. HRMS(ESI): *m/z* [M + Na]<sup>+</sup> calcd for C<sub>15</sub>H<sub>18</sub>N<sub>3</sub>ClNa: 298.1087; found: 298.1085.

#### **1-(4-Methylbenzyl)-4-[(*E*)-5-chloropent-1-enyl]-1*H*-1,2,3-triazole (3cc)**

White solid. Eluent: hexane-EtOAc (7:3); mp 67–68 °C. <sup>1</sup>H NMR (500 MHz, CDCl<sub>3</sub>): δ = 1.88–1.95 (m, 2H), 2.32–2.38 (m, 2H), 2.34 (s, 3H), 3.55 (t, *J* = 6.3 Hz, 2H), 5.44 (s, 2H), 6.34 (dt, *J* = 16.1, 6.3 Hz, 1H), 6.38 (d, *J* = 16.1 Hz, 1H), 7.14–7.19 (m, 4H), 7.32 (s, 1H). <sup>13</sup>C NMR (125 MHz, CDCl<sub>3</sub>): δ = 21.1 (CH<sub>3</sub>), 29.8 (CH<sub>2</sub>), 31.6 (CH<sub>2</sub>), 44.2 (CH<sub>2</sub>), 53.8 (CH<sub>2</sub>), 119.5 (=CH), 119.6 (=CH), 128.0 (2 × CH<sub>arom</sub>), 129.7 (2 × CH<sub>arom</sub>), 131.1 (=CH), 131.6 (C<sub>arom</sub>), 138.6 (C<sub>arom</sub>), 146.2 (=C). IR (KBr): 3112, 2952, 1456, 1434, 1217, 972, 792, 758, 667 cm<sup>-1</sup>. HRMS(ESI): *m/z* [M + Na]<sup>+</sup> calcd for C<sub>15</sub>H<sub>18</sub>N<sub>3</sub>ClNa: 298.1087; found: 298.1086.

#### **1-(4-Chlorobenzyl)-4-[(*E*)-5-chloropent-1-enyl]-1*H*-1,2,3-triazole (3ce)**

White solid. Eluent: hexane-EtOAc (7:3); mp 64–65 °C. <sup>1</sup>H NMR (500 MHz, CDCl<sub>3</sub>): δ = 1.92 (quin, *J* = 6.8 Hz, 2H), 2.32–2.38 (m, 2H), 3.56 (t, *J* = 6.8 Hz, 2H), 5.47 (s, 2H), 6.32–6.40 (m, 1H), 6.40 (d, *J* = 16.1 Hz, 1H), 7.18–7.22 (m, 2H), 7.32–7.36 (m, 2H), 7.35 (s, 1H). <sup>13</sup>C NMR (125 MHz, CDCl<sub>3</sub>): δ = 29.8 (CH<sub>2</sub>), 31.6 (CH<sub>2</sub>), 44.2 (CH<sub>2</sub>), 53.3 (CH<sub>2</sub>), 119.4 (=CH), 119.5 (=CH), 129.2 (2 × CH<sub>arom</sub>), 129.3 (2 × CH<sub>arom</sub>), 131.4 (=CH), 133.2 (C<sub>arom</sub>), 134.7 (C<sub>arom</sub>), 146.5 (=C). IR (KBr): 3097, 3053, 1490, 1436, 1315, 1220, 1087, 1018, 968, 802, 725 cm<sup>-1</sup>. HRMS(ESI): *m/z* [M + Na]<sup>+</sup> calcd for C<sub>14</sub>H<sub>15</sub>N<sub>3</sub>Cl<sub>2</sub>Na: 318.0541; found: 318.0540.

#### **1-(4-Bromobenzyl)-4-[(*E*)-5-chloropent-1-enyl]-1*H*-1,2,3-triazole (3cf)**

White solid. Eluent: hexane-EtOAc (7:3); mp 76–78 °C. <sup>1</sup>H NMR (500 MHz, CDCl<sub>3</sub>): δ = 1.86–1.94 (m, 2H), 2.30–2.37 (m, 2H), 3.55 (t, *J* = 6.8 Hz, 2H), 5.44 (s, 2H), 6.31–6.39 (m, 1H), 6.39 (d, *J* = 16.1 Hz, 1H), 7.12 (d, *J* = 8.3 Hz, 2H), 7.43–7.48 (m, 3H). <sup>13</sup>C NMR (125 MHz, CDCl<sub>3</sub>): δ = 29.5 (CH<sub>2</sub>), 31.3 (CH<sub>2</sub>), 44.0 (CH<sub>2</sub>), 52.9 (CH<sub>2</sub>), 119.1 (=CH), 119.5 (=CH), 122.4 (C<sub>arom</sub>), 129.3 (2 × CH<sub>arom</sub>), 131.1 (=CH), 131.8 (2 × CH<sub>arom</sub>), 133.5 (C<sub>arom</sub>), 146.2 (=C). IR (KBr): 3116, 3043, 1488, 1454, 1409, 1352, 1220, 1053, 1010, 966, 798, 650 cm<sup>-1</sup>. HRMS(ESI): *m/z* [M + Na]<sup>+</sup> calcd for C<sub>14</sub>H<sub>15</sub>N<sub>3</sub>ClBrNa: 362.0036; found: 362.0033.

#### **1-(4-Methylbenzyl)-4-[(*E*)-2-(cyclohex-1-enyl)ethenyl]-1*H*-1,2,3-triazole (3dc)**

White solid. Eluent: hexane-EtOAc (7:3); mp 88 °C (dec). <sup>1</sup>H NMR (500 MHz, CDCl<sub>3</sub>): δ = 1.57–1.75 (m, 4H), 2.12–2.23 (m, 4H), 2.34 (s, 3H), 5.44 (s, 2H), 5.83–5.88 (m, 1H), 6.38 (d, *J* = 16.1 Hz, 1H), 6.85 (d, *J* = 16.1 Hz, 1H), 7.11–7.21 (m, 4H), 7.36 (s, 1H). <sup>13</sup>C NMR (125 MHz, CDCl<sub>3</sub>): δ = 21.2 (CH<sub>3</sub>), 22.3 (CH<sub>2</sub>), 22.4 (CH<sub>2</sub>), 24.1 (CH<sub>2</sub>), 26.0 (CH<sub>2</sub>), 53.8 (CH<sub>2</sub>), 113.0 (=CH), 119.3 (=CH), 128.0 (2 × CH<sub>arom</sub>), 129.7 (2 × CH<sub>arom</sub>), 131.4 (=CH), 131.7 (C<sub>arom</sub>), 134.5 (=CH), 135.4 (=C), 138.6 (C<sub>arom</sub>), 147.2 (=C). IR (KBr): 3116, 2931, 2860, 1515, 1454, 1434, 1348, 1220, 1051, 962, 804, 771, 756 cm<sup>-1</sup>. HRMS(ESI): *m/z* [M + Na]<sup>+</sup> calcd for C<sub>18</sub>H<sub>21</sub>N<sub>3</sub>Na: 302.1633; found: 302.1629.

#### **1-[4-(Trifluoromethyl)benzyl]-4-[(*E*)-2-(cyclohex-1-enyl)ethenyl]-1*H*-1,2,3-triazole (3dd)**

Light-brown solid. Eluent: hexane-EtOAc (7:3); mp 80–81 °C. <sup>1</sup>H NMR (600 MHz, CDCl<sub>3</sub>): δ = 1.59–1.74 (m, 4H), 2.14–2.23 (m, 4H), 5.57 (s, 2H), 5.87–5.91 (m, 1H), 6.40 (d, *J* = 16.5 Hz, 1H), 6.89 (d, *J* = 16.5 Hz, 1H), 7.36 (d, *J* = 8.3 Hz, 2H), 7.44 (s, 1H), 7.62 (d, *J* = 8.3 Hz, 2H). <sup>13</sup>C NMR (200 MHz, CDCl<sub>3</sub>): δ = 23.3 (CH<sub>2</sub>), 23.4 (CH<sub>2</sub>), 24.1 (CH<sub>2</sub>), 26.1 (CH<sub>2</sub>), 53.3 (CH<sub>2</sub>), 112.6 (=CH), 119.7 (=CH), 123.8 (CF<sub>3</sub>, *q*, *J* = 271.7 Hz), 126.0 (2 × CH<sub>arom</sub>, *q*, *J* = 4.3 Hz), 128.1 (2 × CH<sub>arom</sub>), 130.9 (C<sub>arom</sub>, *q*, *J* = 33.2 Hz), 131.9 (=CH), 135.0 (=CH), 135.3 (=C), 138.8 (C<sub>arom</sub>), 147.6 (=C). IR (KBr): 2931, 1622, 1454, 1421, 1330, 1159, 1120, 1107, 1068, 1051, 1018, 958, 817 cm<sup>-1</sup>. HRMS(ESI): *m/z* [M + Na]<sup>+</sup> calcd for C<sub>18</sub>H<sub>18</sub>N<sub>3</sub>F<sub>3</sub>Na: 356.1350; found: 356.1349.

#### **1-(4-Bromobenzyl)-4-[(*E*)-2-(cyclohex-1-enyl)ethenyl]-1*H*-1,2,3-triazole (3df)**

Light-brown solid. Eluent: hexane-EtOAc (7:3); mp 113 °C (dec). <sup>1</sup>H NMR (600 MHz, CDCl<sub>3</sub>): δ = 1.59–1.73 (m, 4H), 2.14–2.23 (m, 4H), 5.45 (s, 2H), 5.86–5.90 (m, 1H), 6.39 (d, *J* = 16.5 Hz, 1H), 6.87 (d, *J* = 16.5 Hz, 1H), 7.10–7.19 (m, 2H), 7.39 (s, 1H), 7.46–7.53 (m, 2H). <sup>13</sup>C NMR (200 MHz, CDCl<sub>3</sub>): δ = 22.3 (CH<sub>2</sub>), 22.4 (CH<sub>2</sub>), 24.1 (CH<sub>2</sub>), 26.0 (CH<sub>2</sub>), 53.3 (CH<sub>2</sub>), 112.7 (=CH), 119.4 (=CH), 122.8 (C<sub>arom</sub>), 129.5 (2 × CH<sub>arom</sub>), 131.7 (=CH), 132.2 (2 × CH<sub>arom</sub>), 133.8 (C<sub>arom</sub>), 134.8 (=CH), 135.3 (=C), 147.4 (=C). IR (KBr): 2931, 1488, 1456, 1434, 1407, 1072, 1051, 1012, 958, 796 cm<sup>-1</sup>. HRMS(ESI): *m/z* [M + Na]<sup>+</sup> calcd for C<sub>17</sub>H<sub>18</sub>N<sub>3</sub>BrNa: 366.0582; found: 366.0579.

#### **1-(4-Methoxycarbonylbenzyl)-4-[(*E*)-2-(cyclohex-1-enyl)ethenyl]-1*H*-1,2,3-triazole (3dh)**

White solid. Eluent: hexane-EtOAc (7:3); mp 113–115 °C. <sup>1</sup>H NMR (600 MHz, CDCl<sub>3</sub>): δ = 1.58–1.73 (m, 4H), 2.13–2.23 (m, 4H), 3.91 (s, 3H), 5.56 (s, 2H), 5.86–5.89 (m, 1H), 6.40 (d, *J* = 16.5 Hz, 1H), 6.89 (d, *J* = 16.5 Hz, 1H), 7.29 (d, *J* = 8.3 Hz, 2H), 7.44 (s, 1H), 8.02 (d, *J* = 8.3 Hz, 2H). <sup>13</sup>C NMR (200 MHz, CDCl<sub>3</sub>): δ = 22.3 (CH<sub>2</sub>), 22.4 (CH<sub>2</sub>), 24.1 (CH<sub>2</sub>), 26.0 (CH<sub>2</sub>), 52.2 (CH<sub>3</sub>), 53.5 (CH<sub>2</sub>), 112.6 (=CH), 119.6 (=CH), 127.7 (2 × CH<sub>arom</sub>), 130.3 (2 × CH<sub>arom</sub>), 130.4 (C<sub>arom</sub>), 131.7 (=CH), 134.9 (=CH), 135.3 (=C), 139.6 (C<sub>arom</sub>), 147.5 (=C), 166.4 (O=C). IR (KBr): 2933, 1724, 1434, 1280, 1110, 962, 729, 667 cm<sup>-1</sup>. HRMS(ESI): *m/z* [M + Na]<sup>+</sup> calcd for C<sub>19</sub>H<sub>21</sub>N<sub>3</sub>O<sub>2</sub>Na: 346.1531; found: 346.1528.

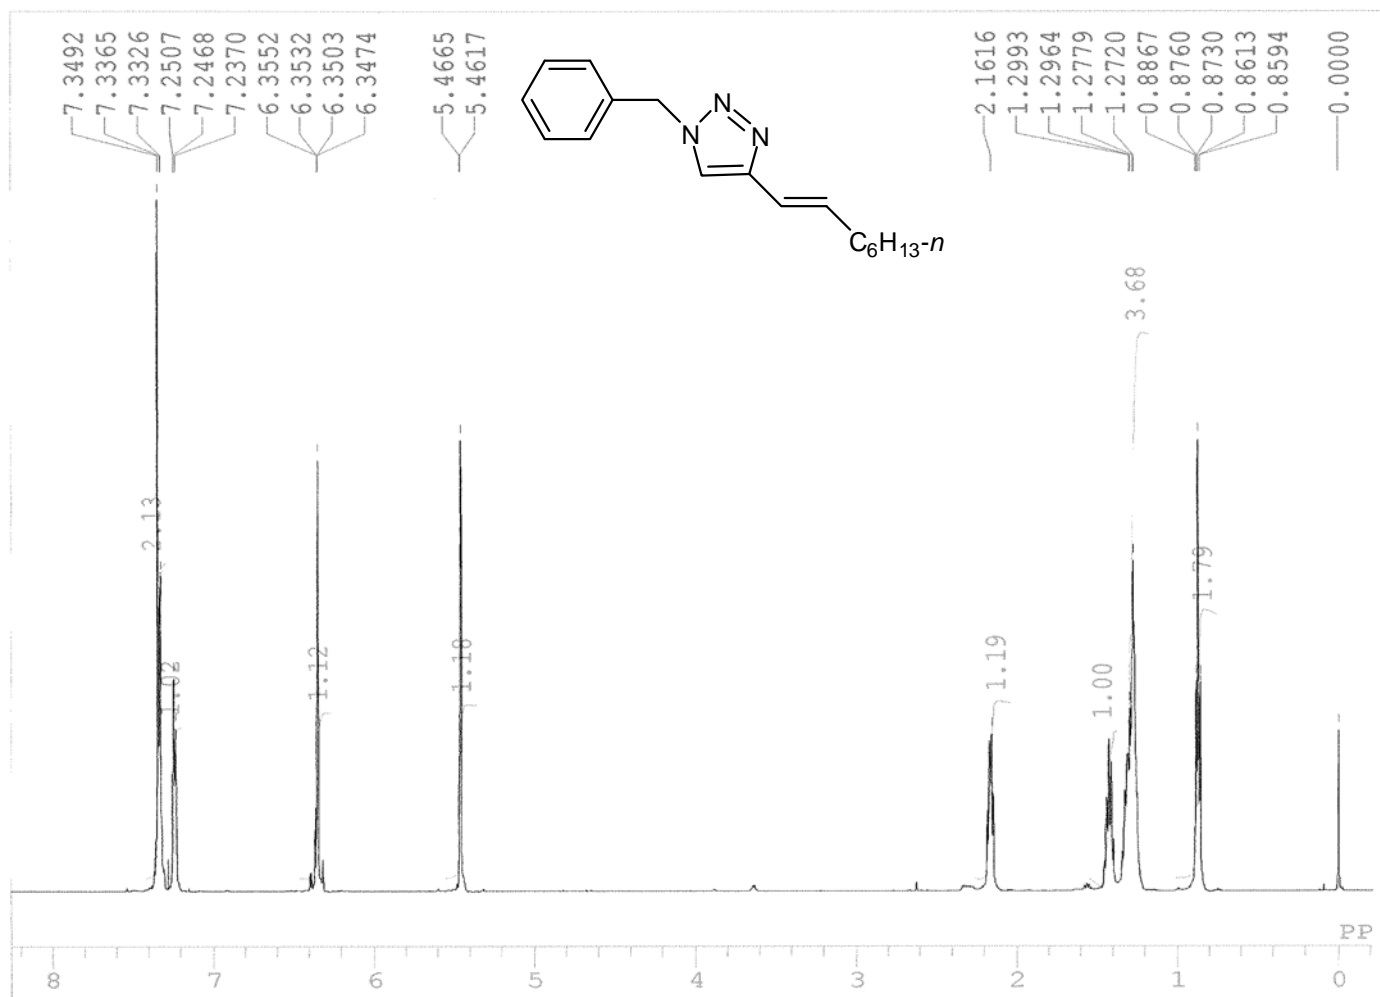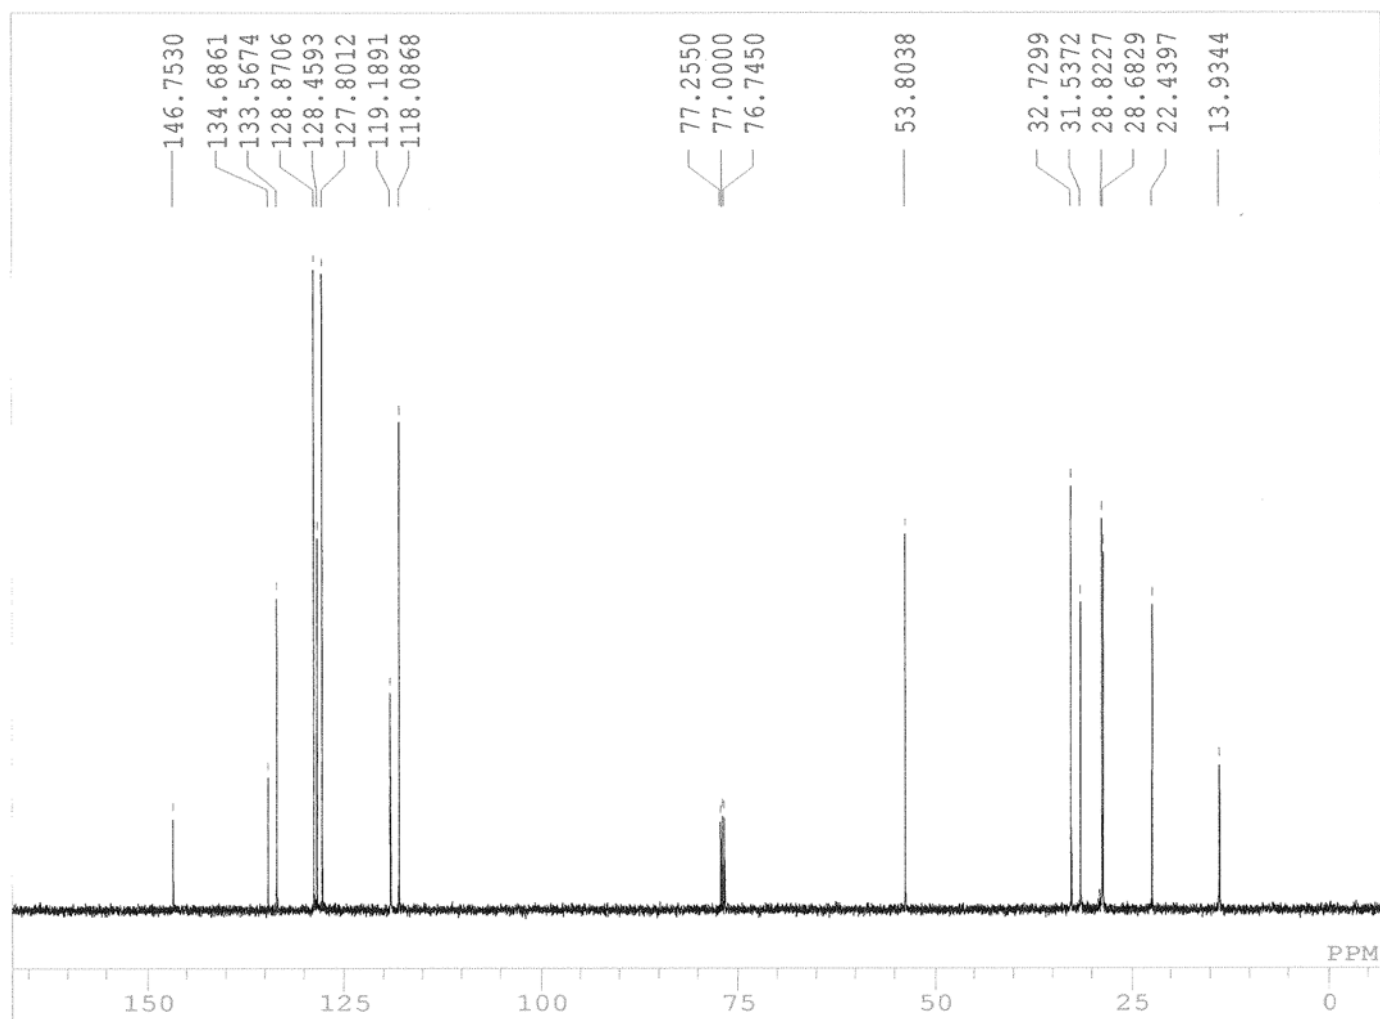

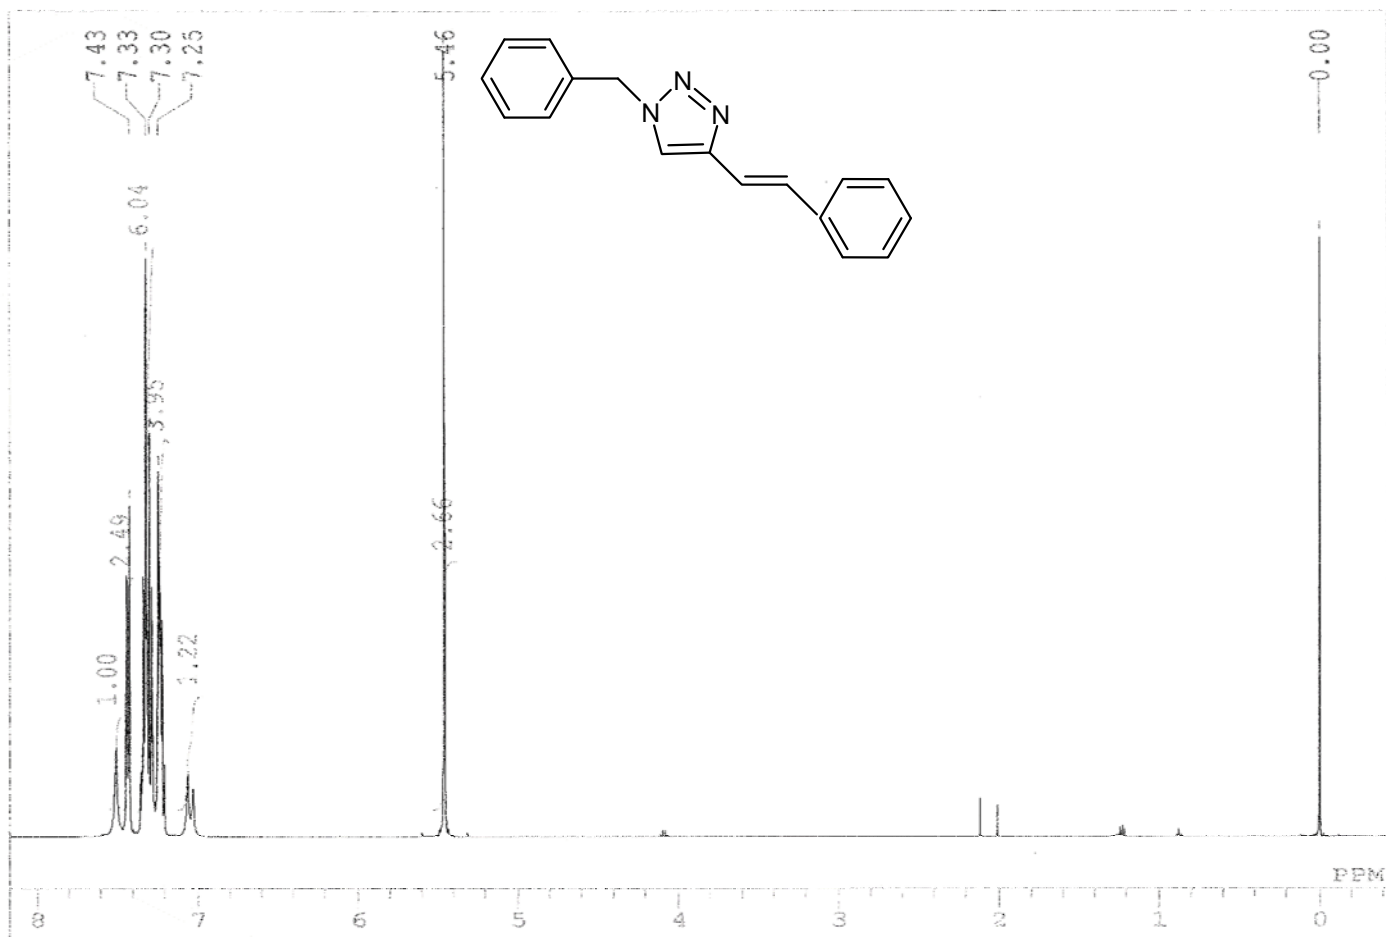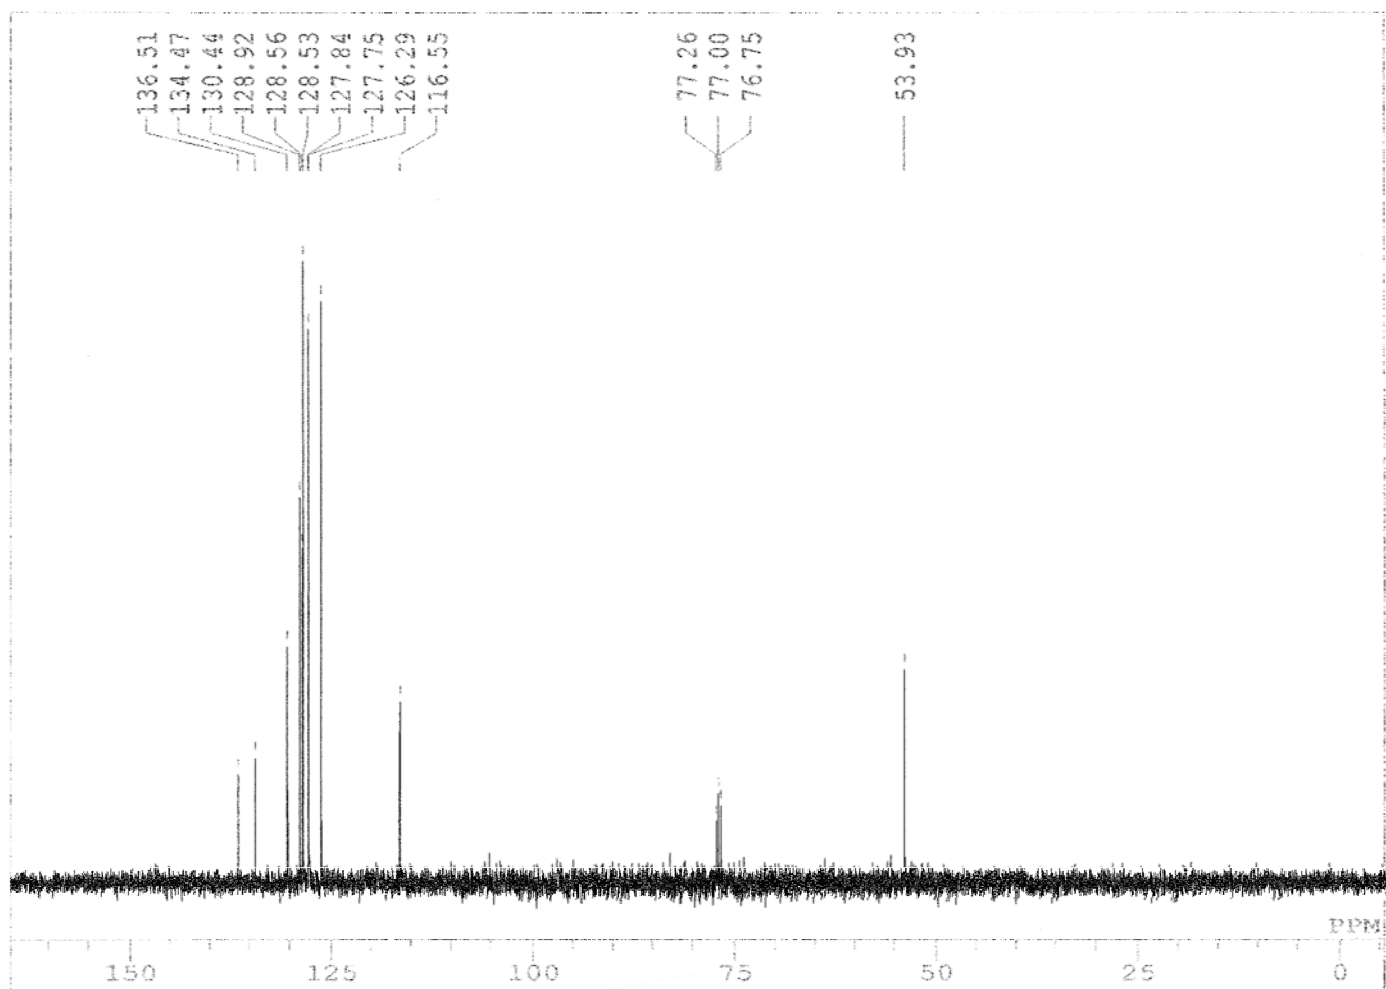

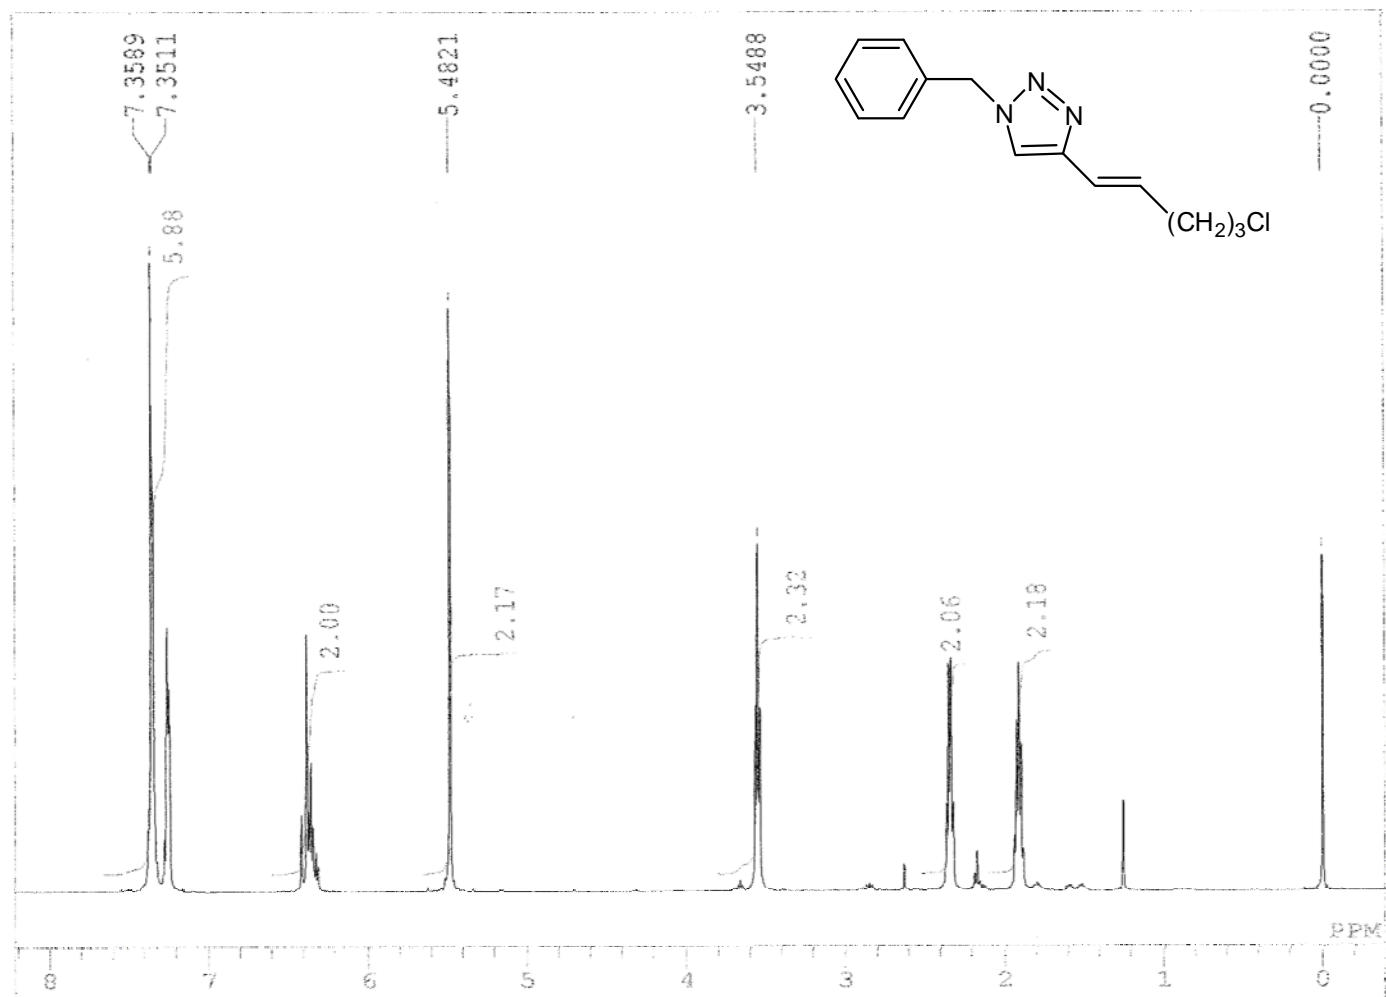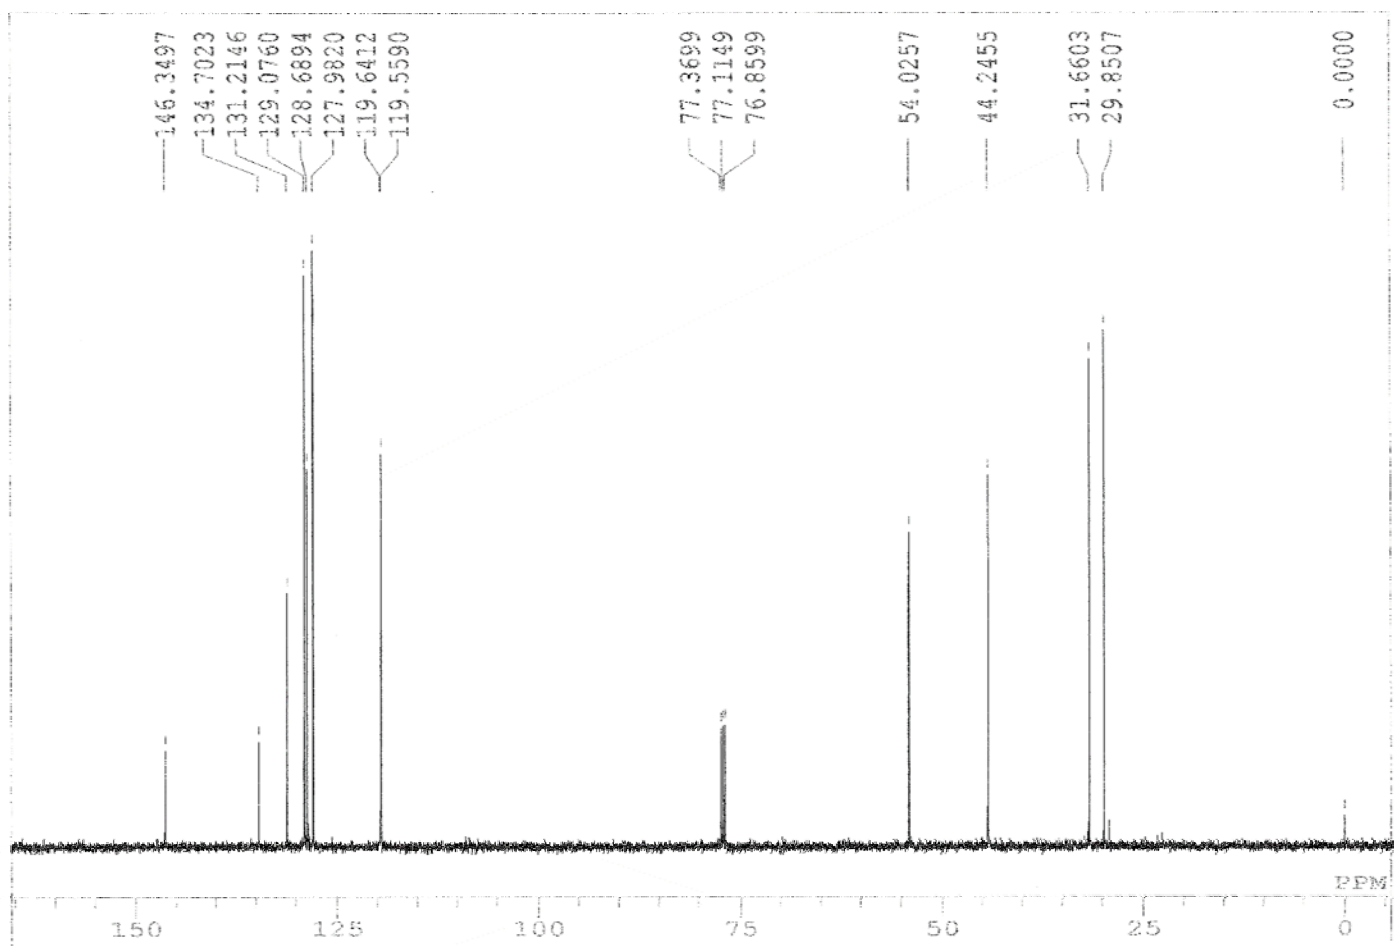



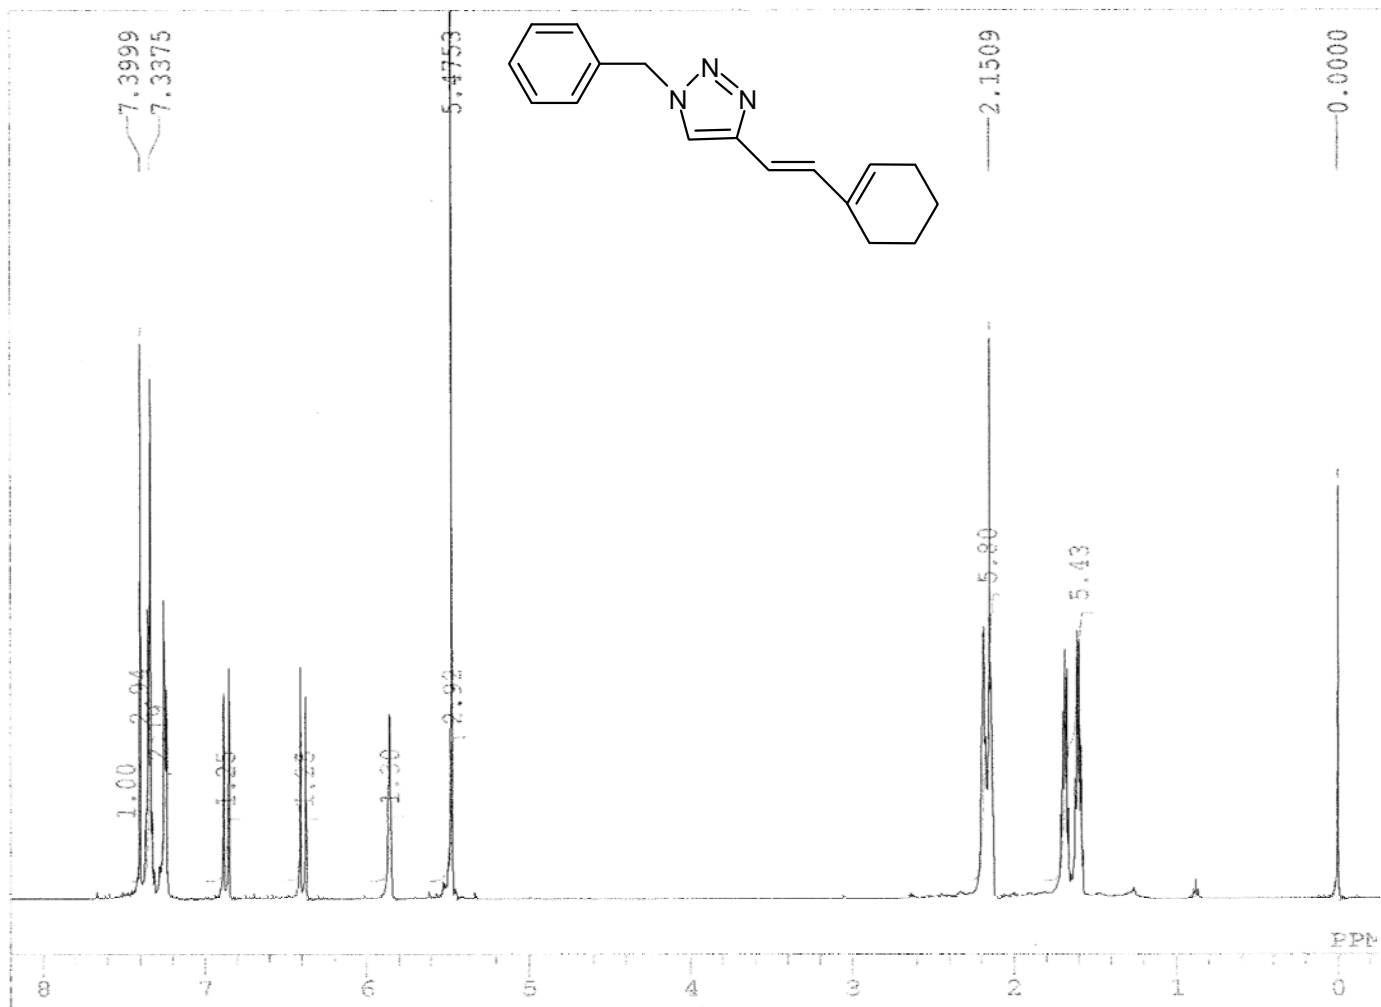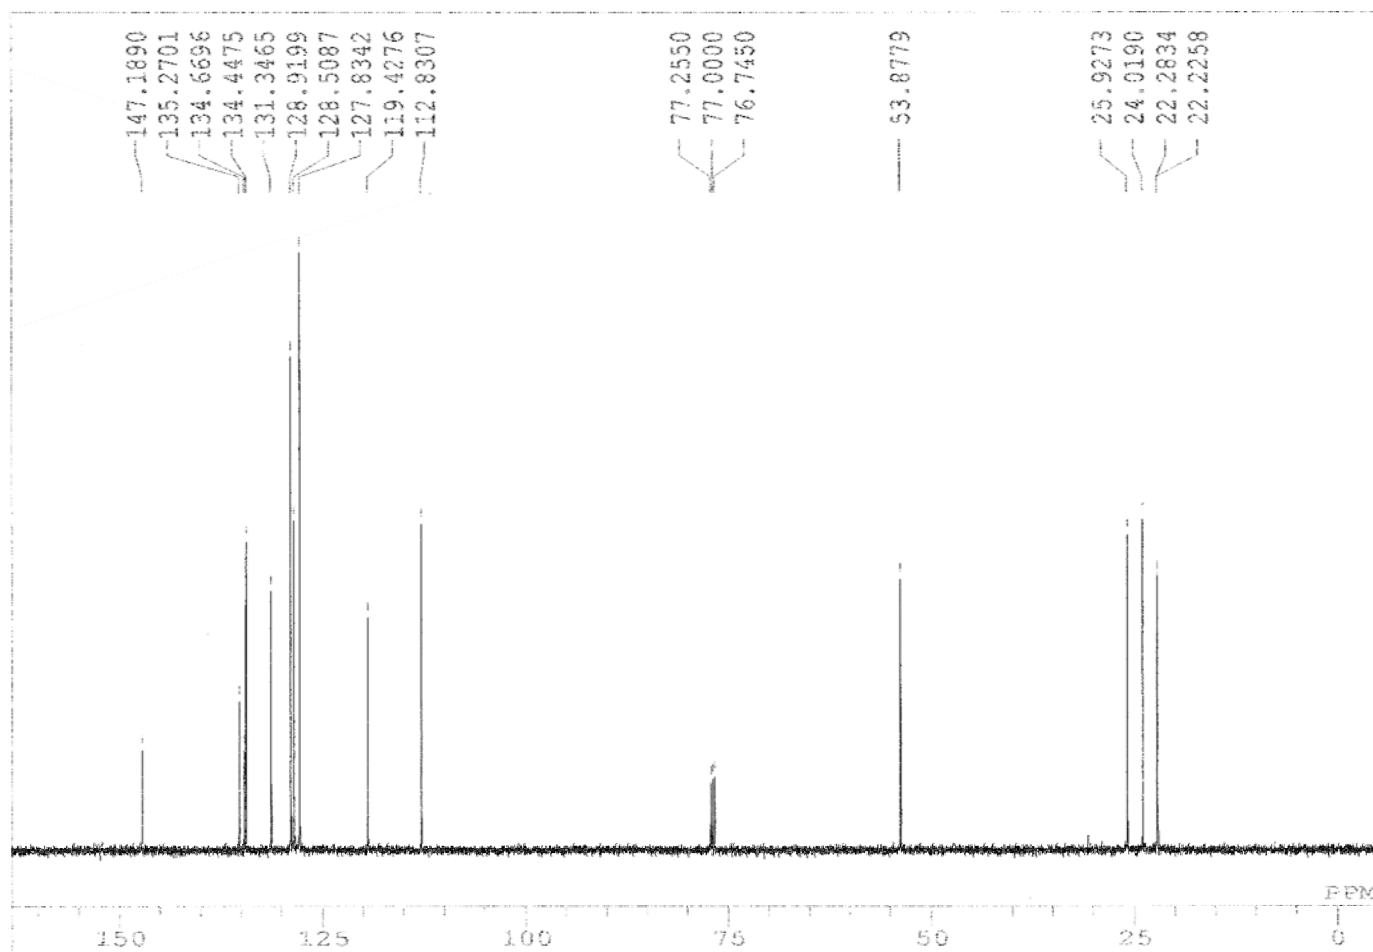

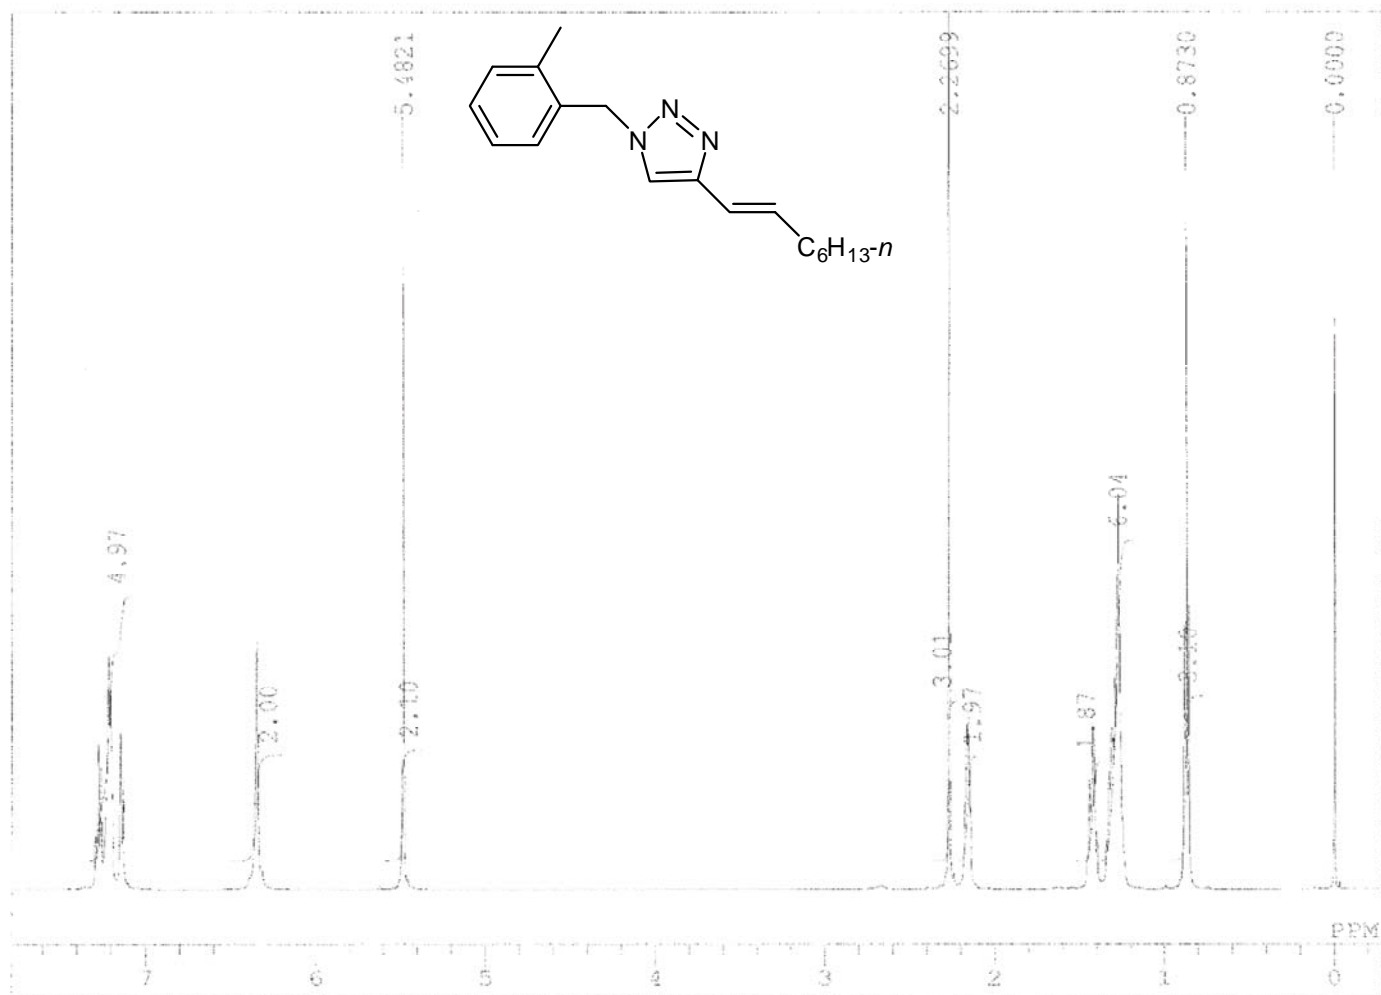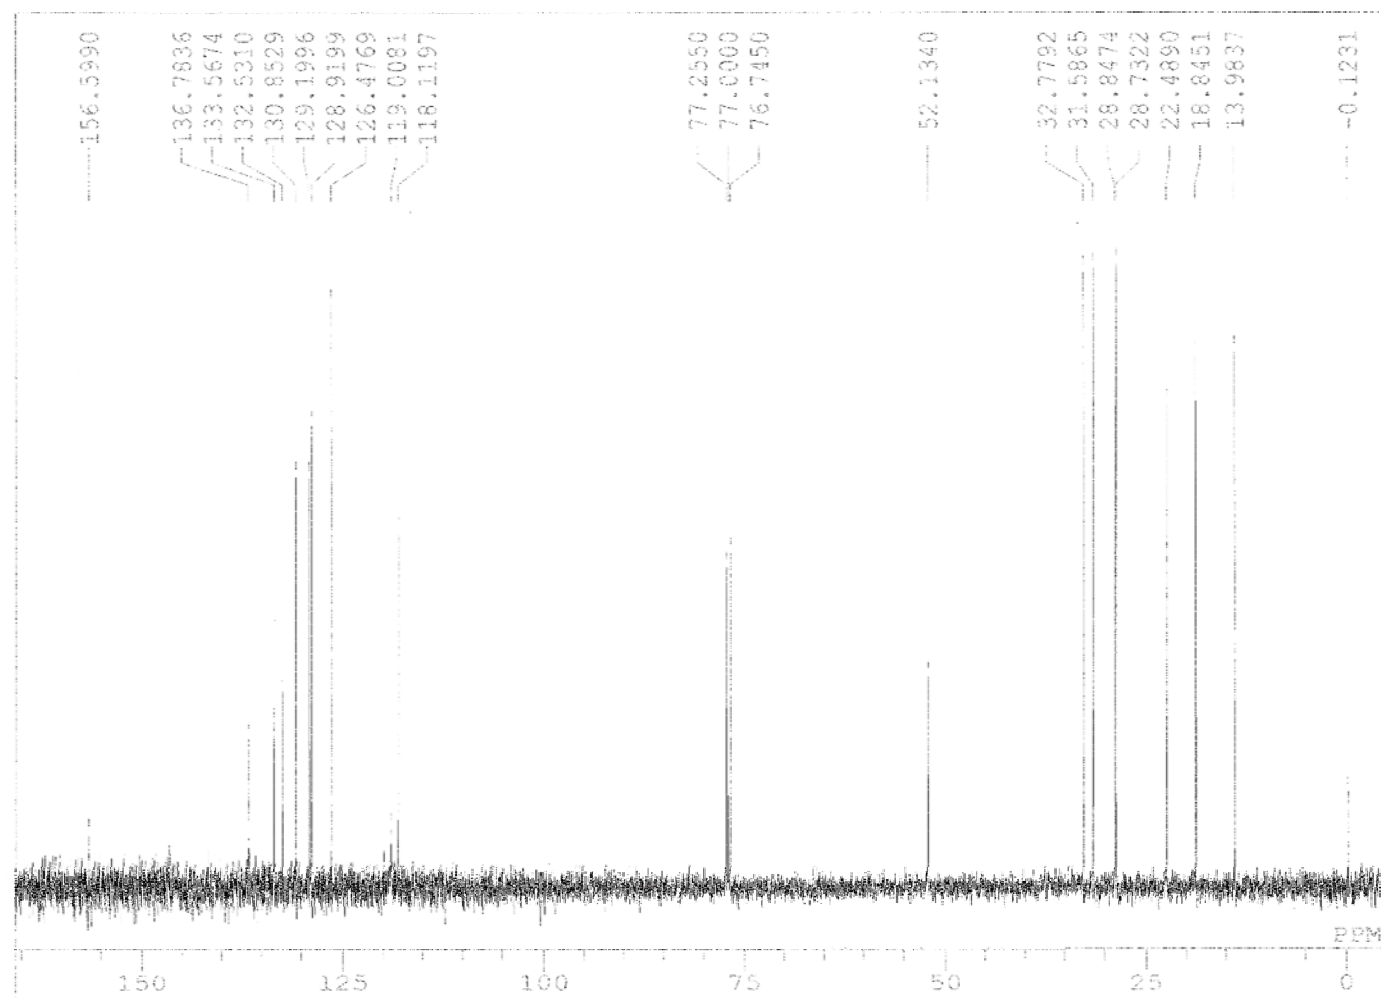

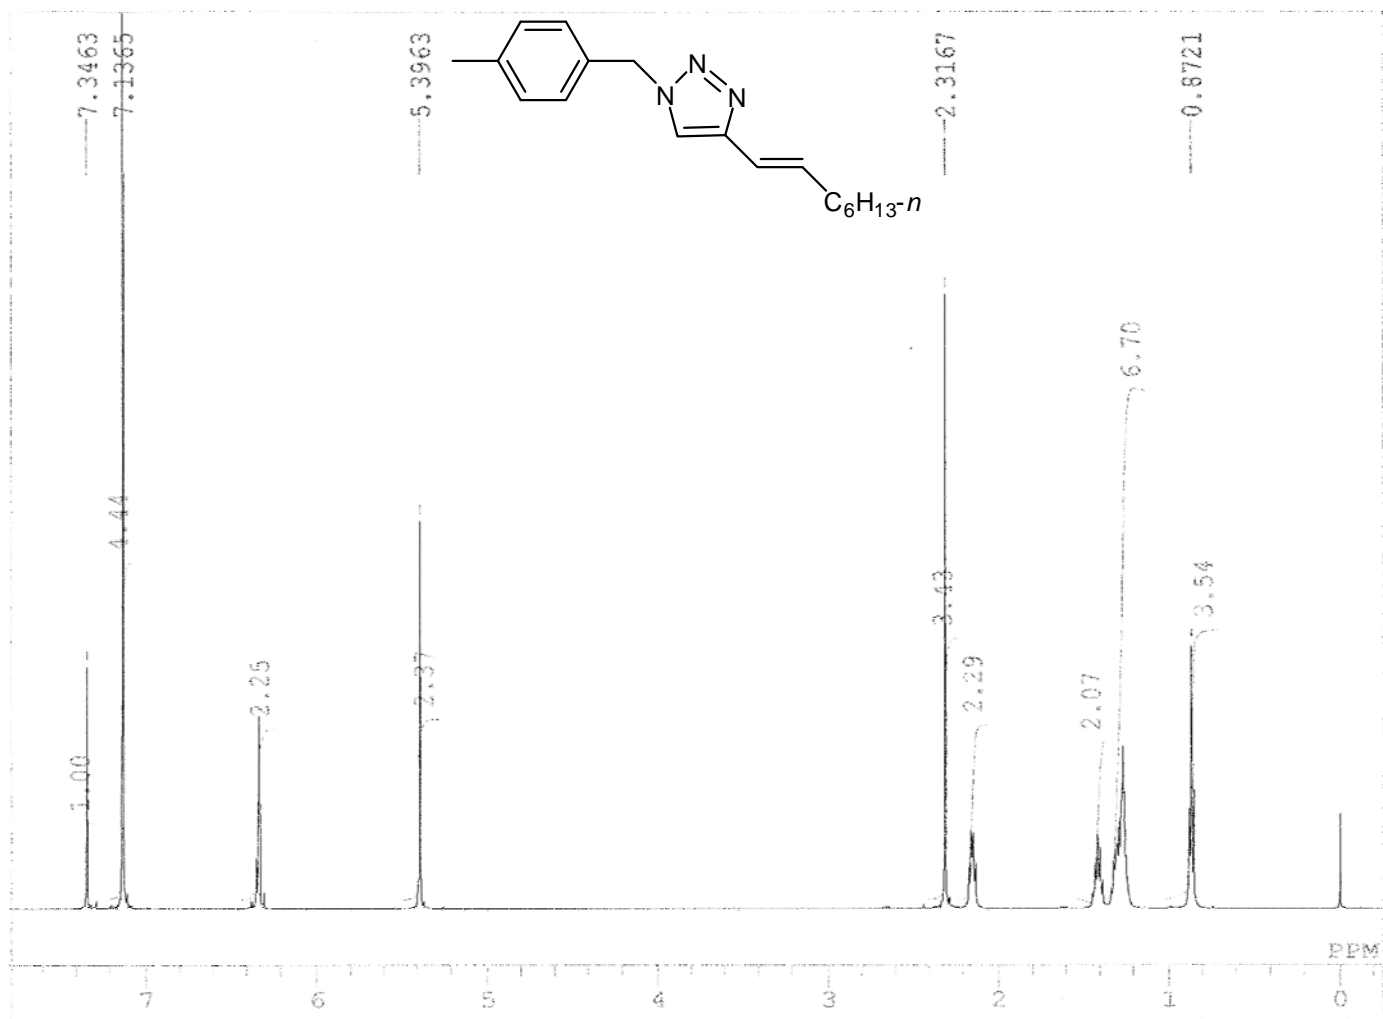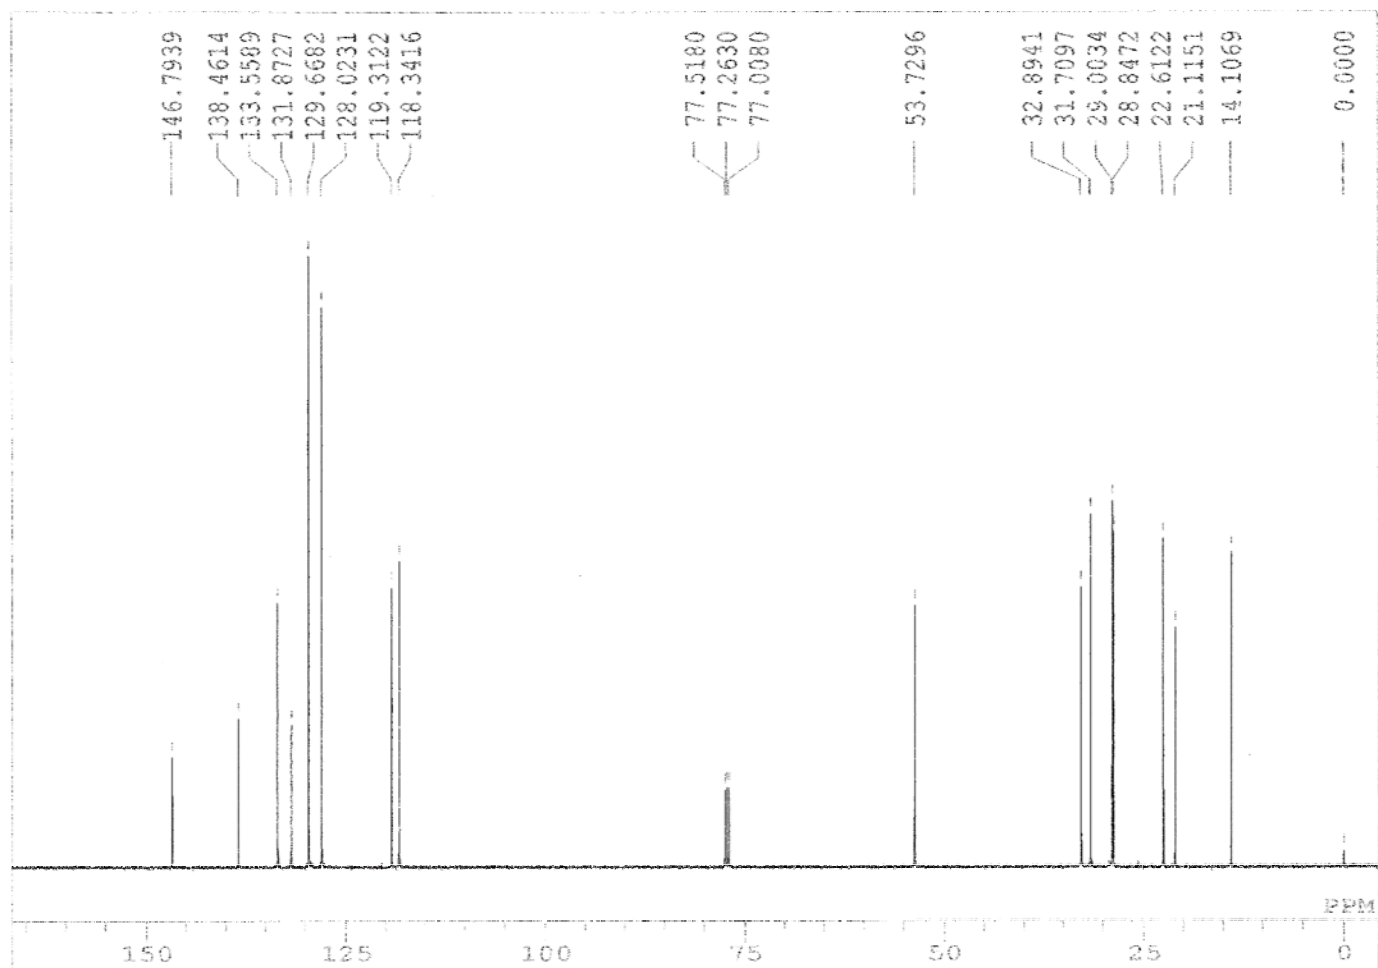

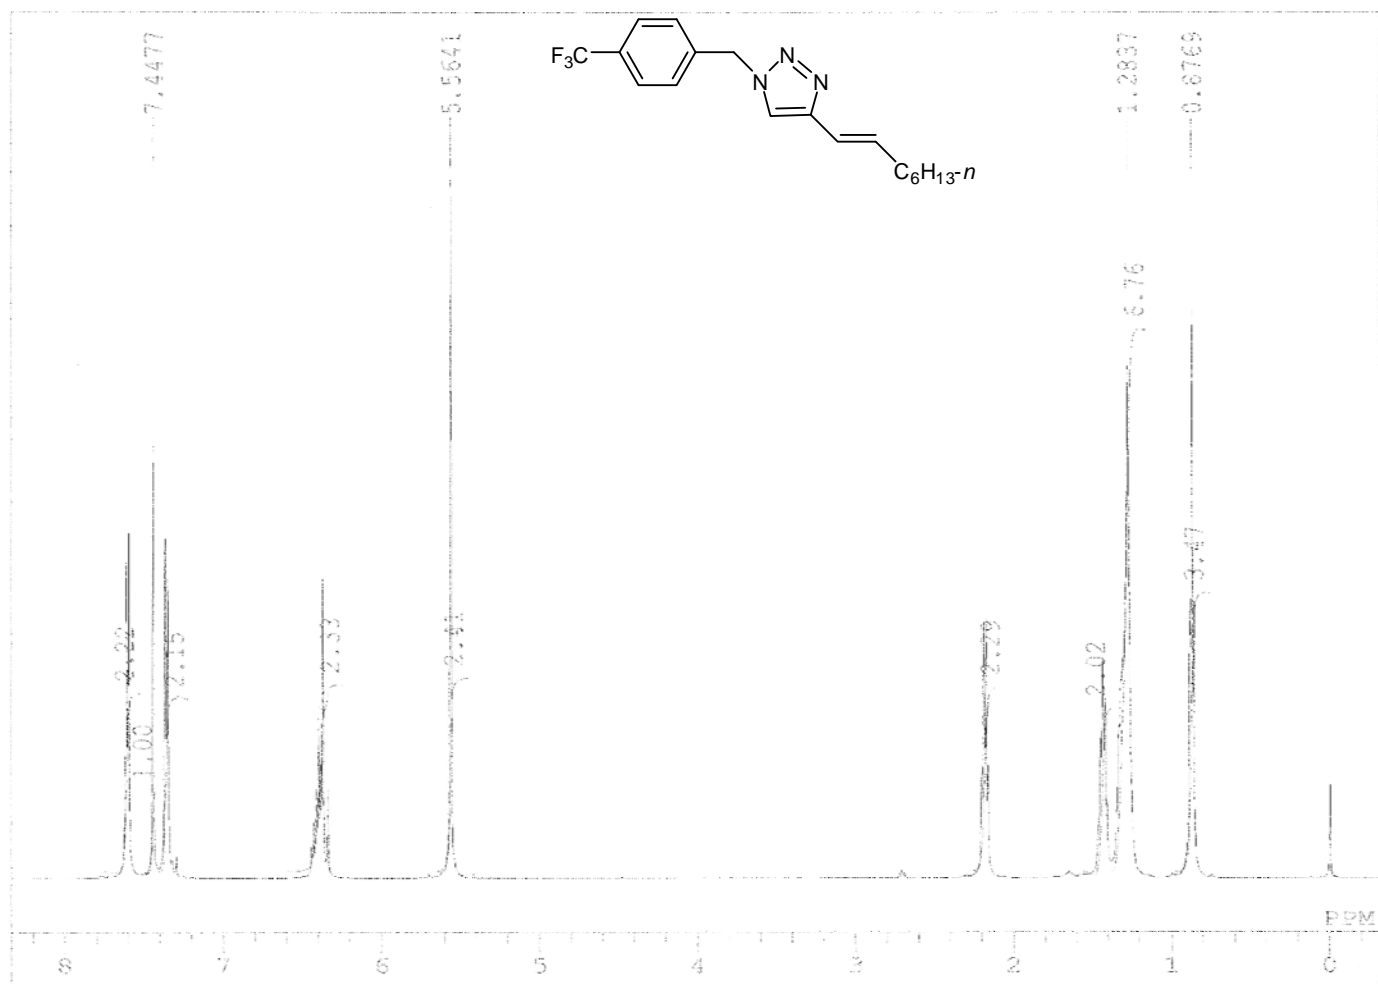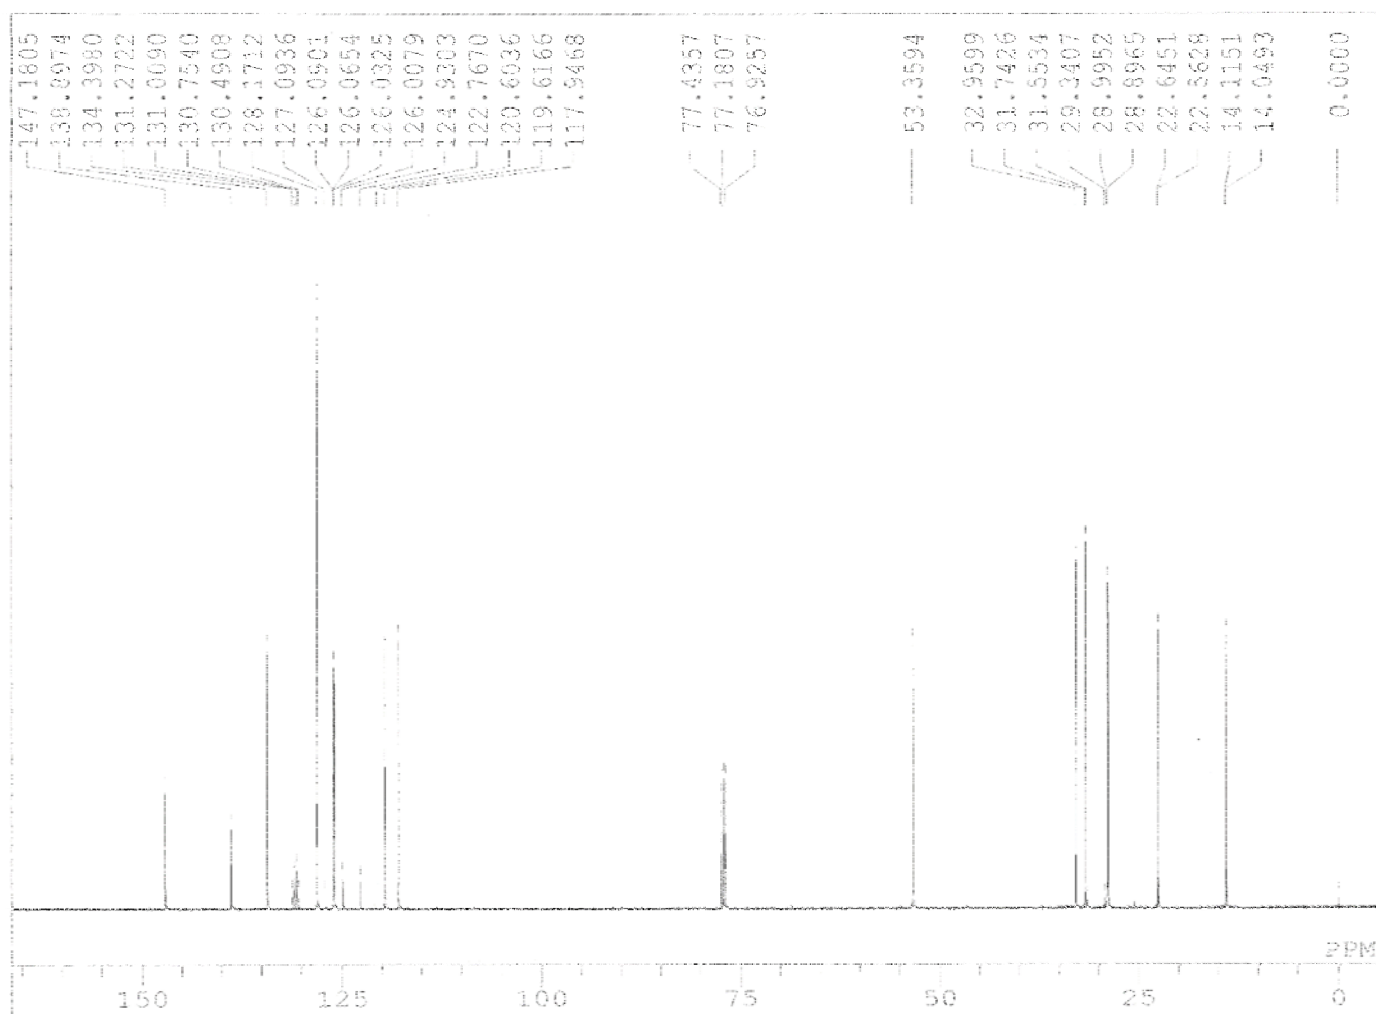

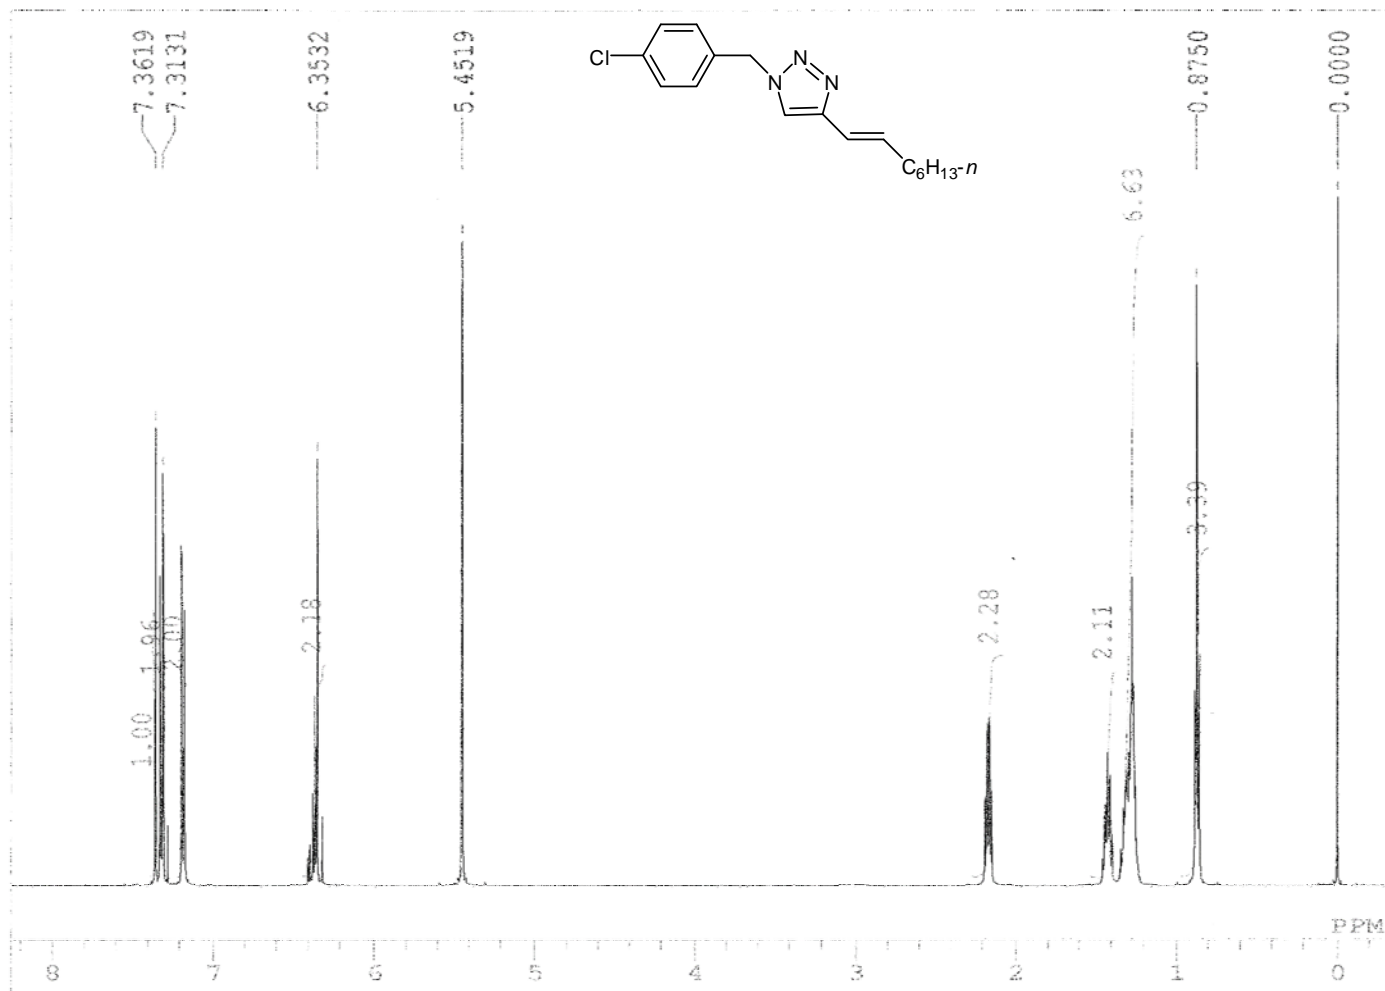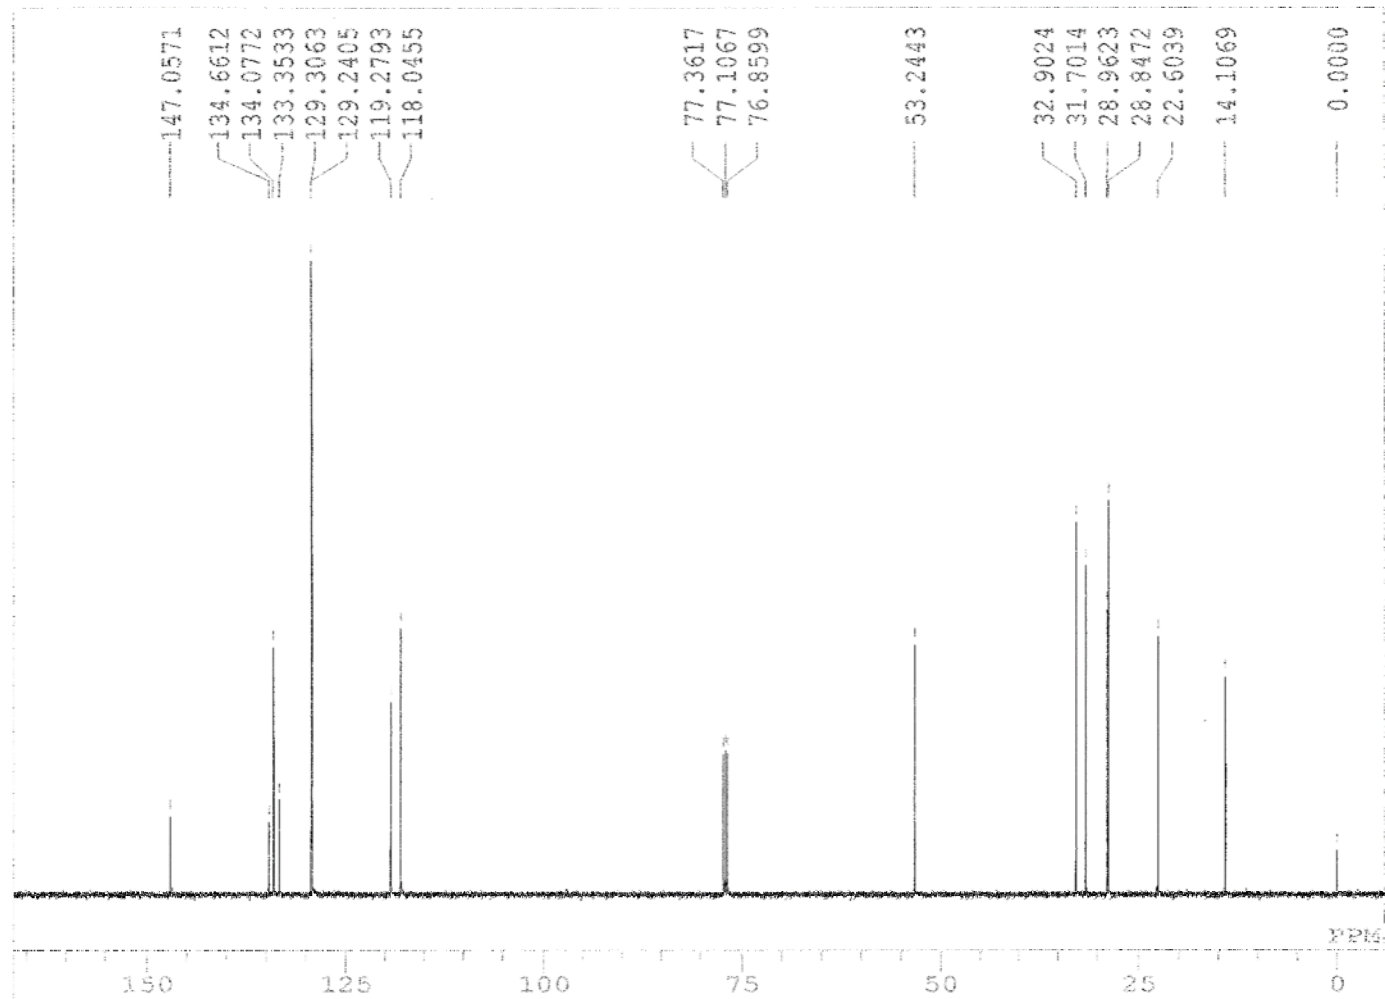

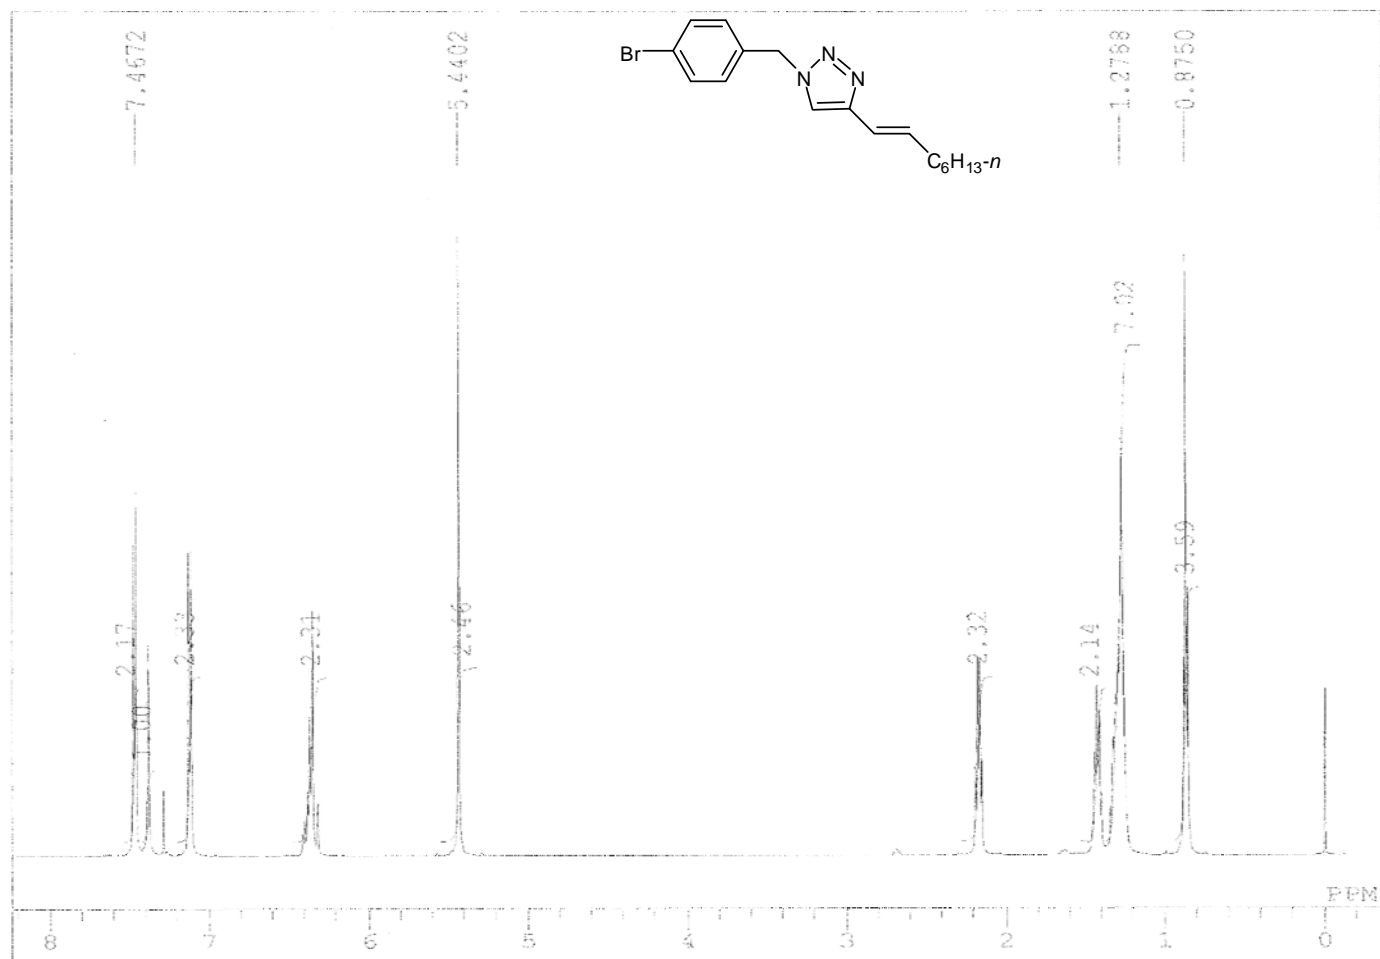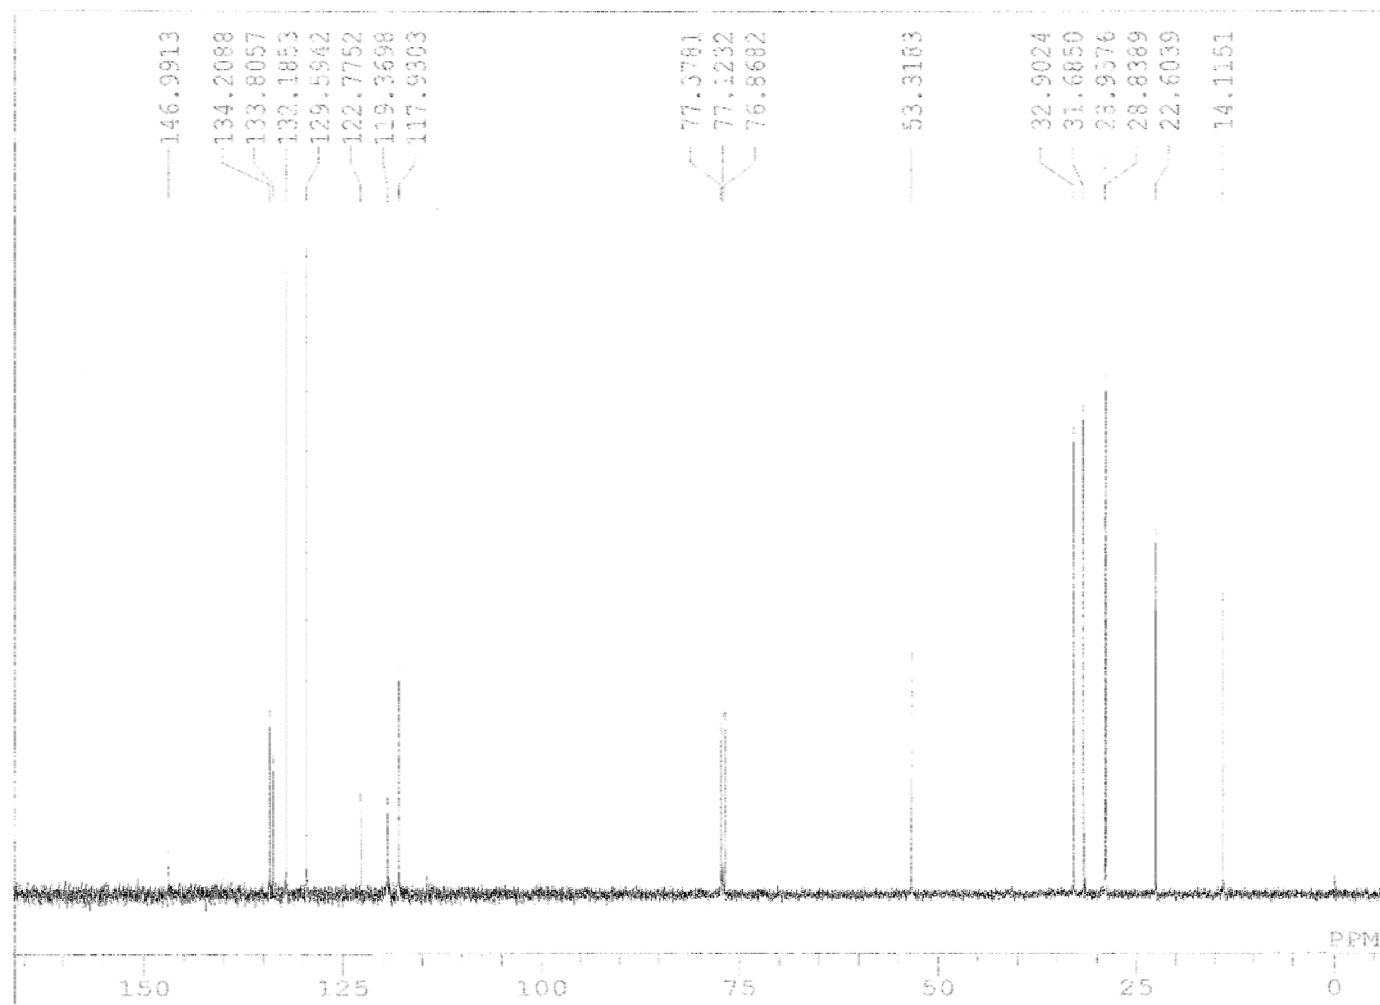

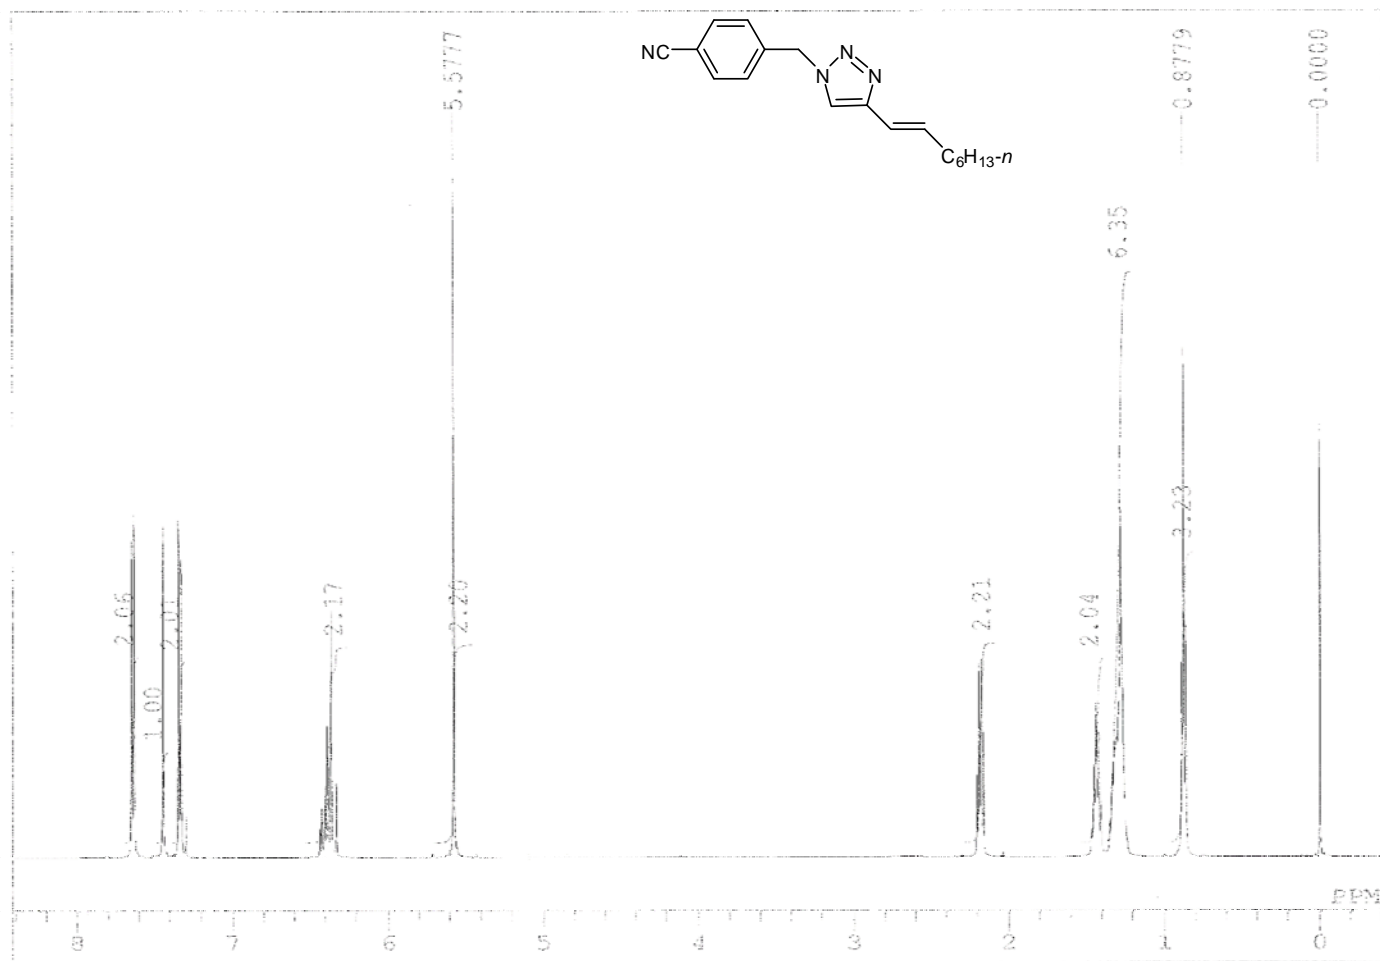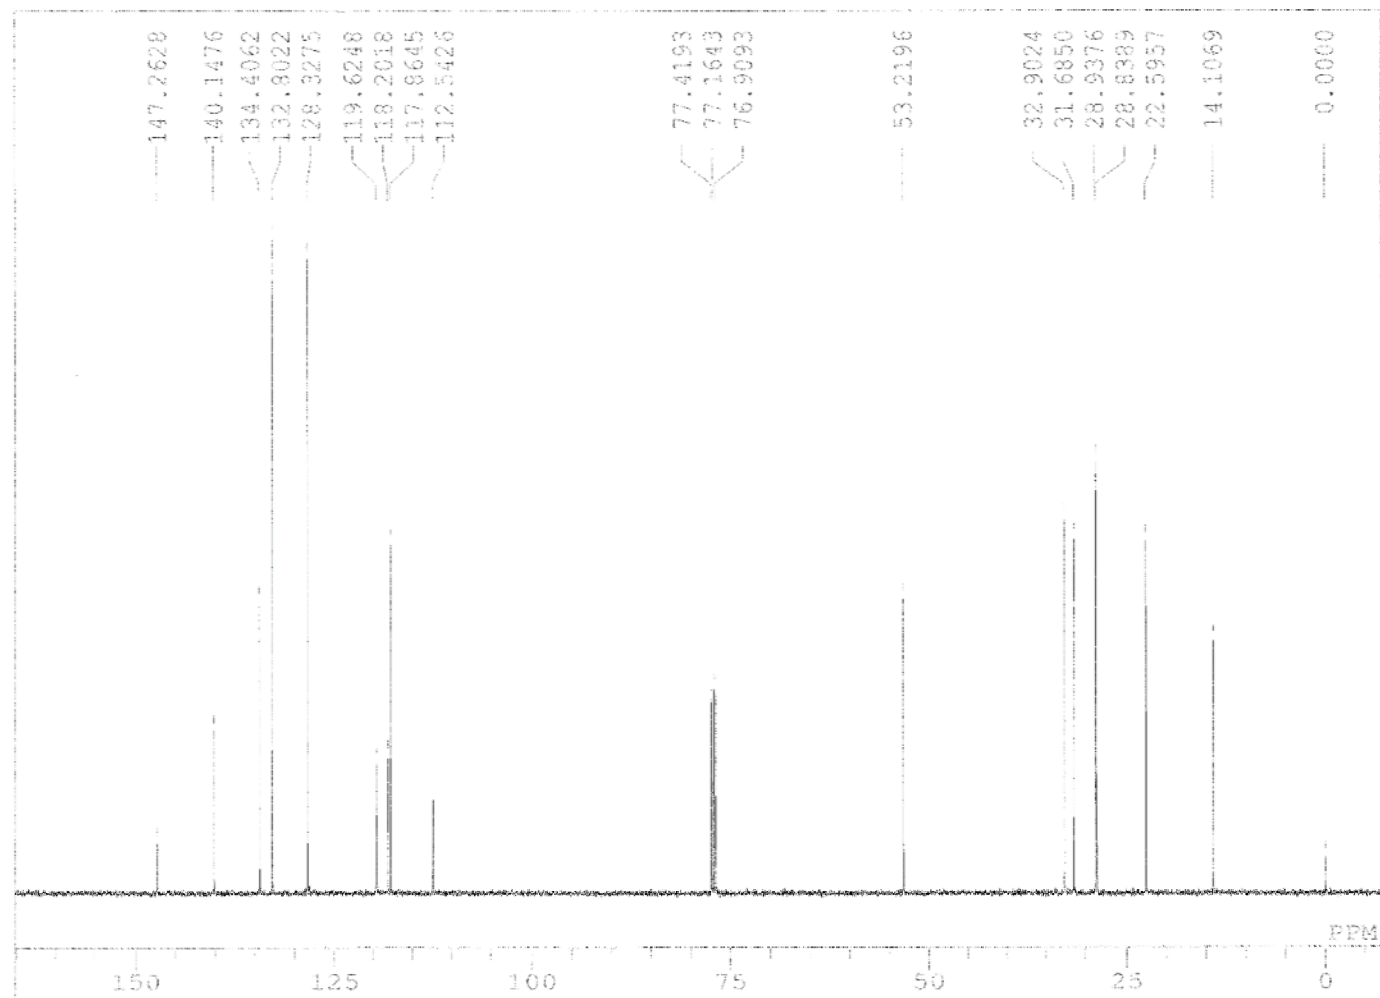



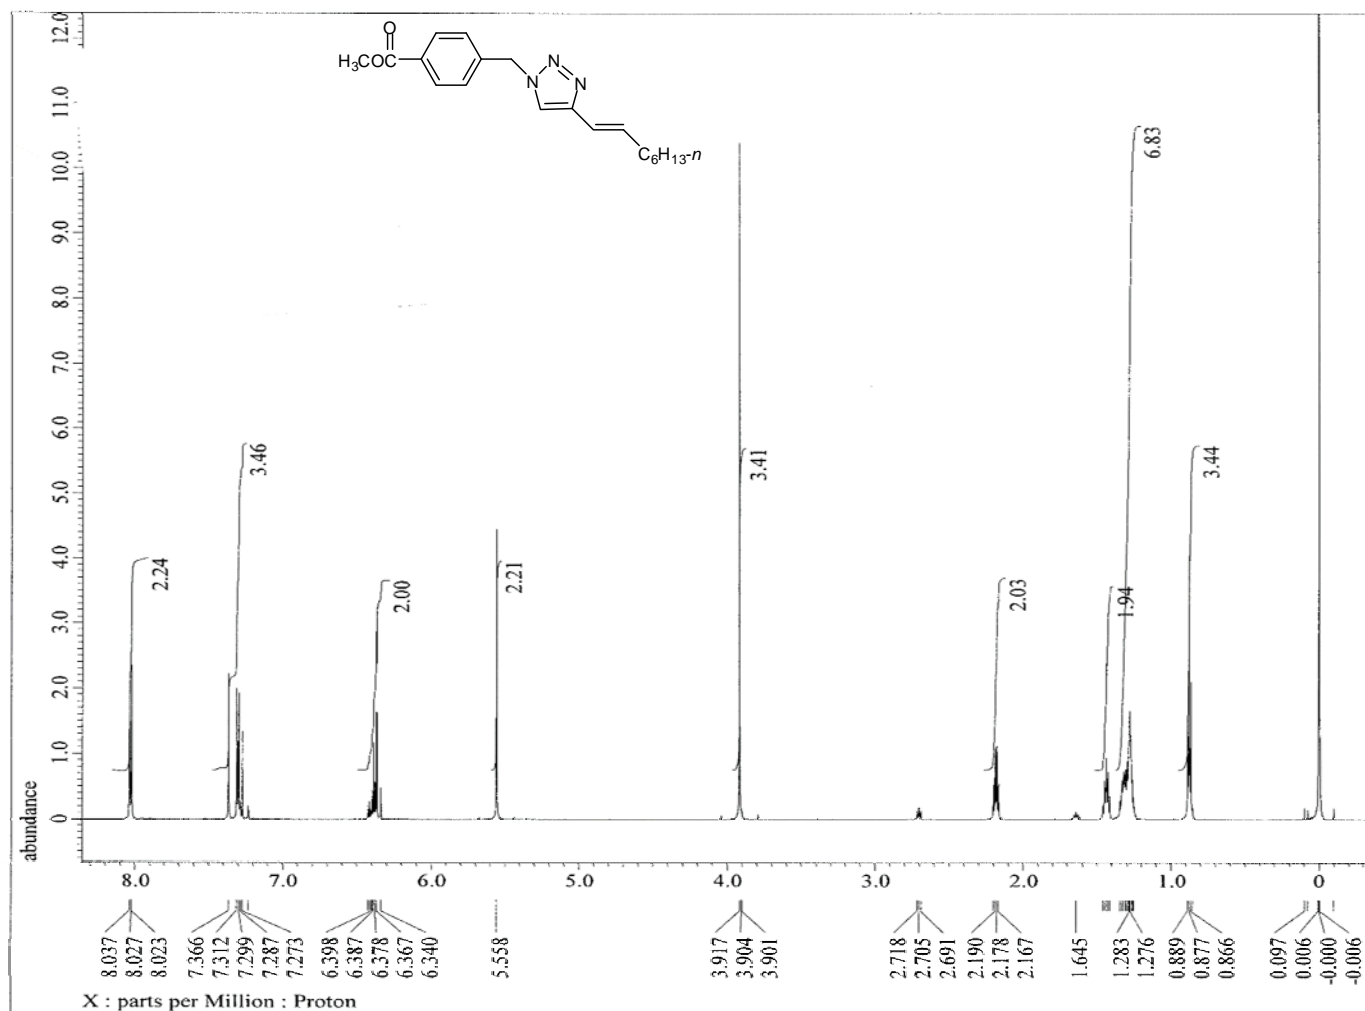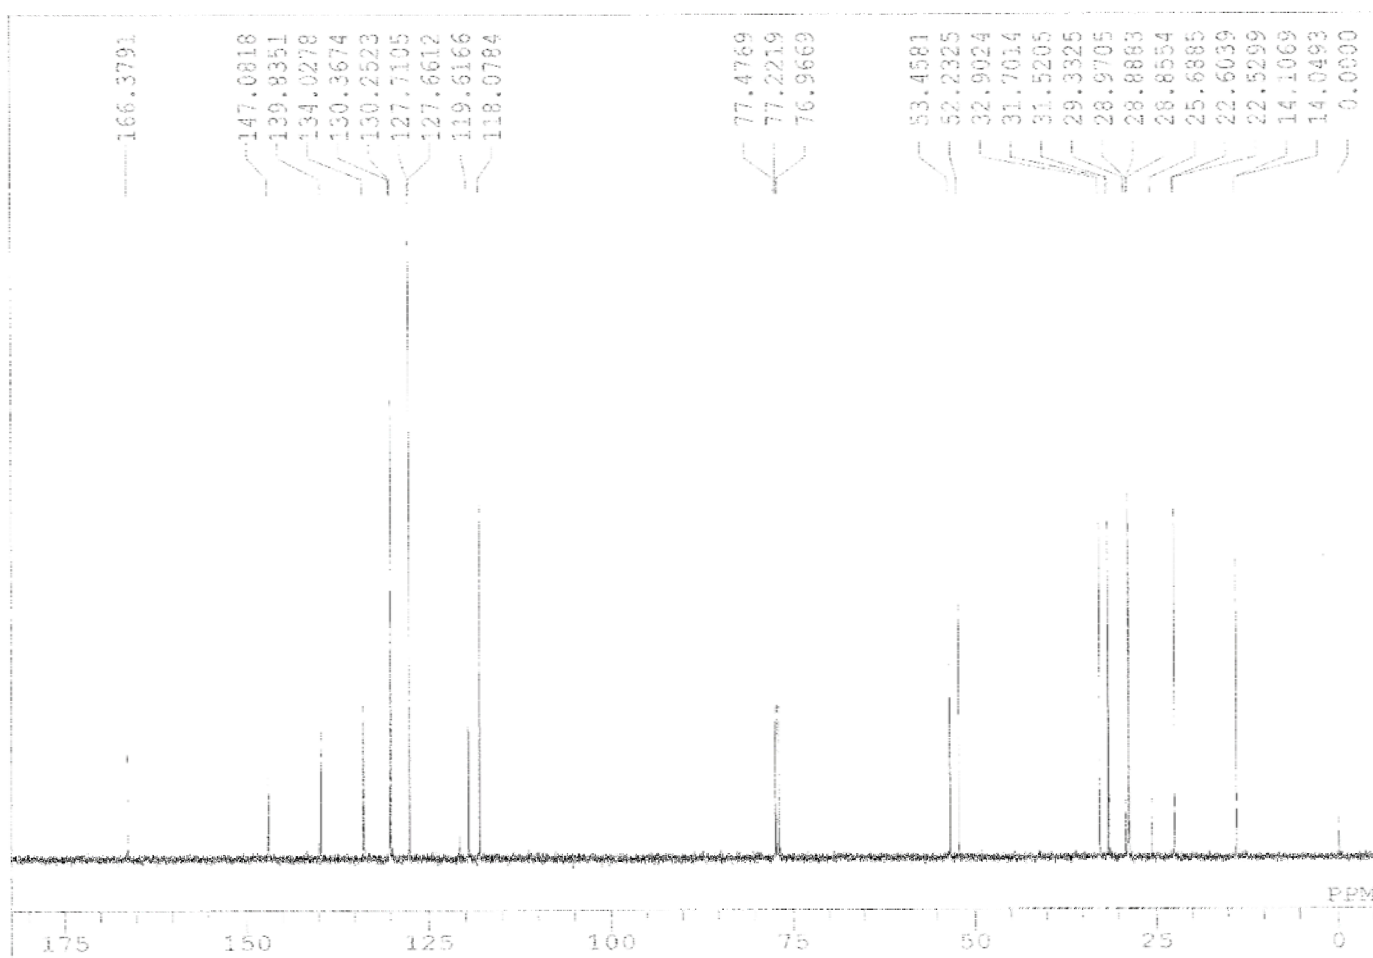

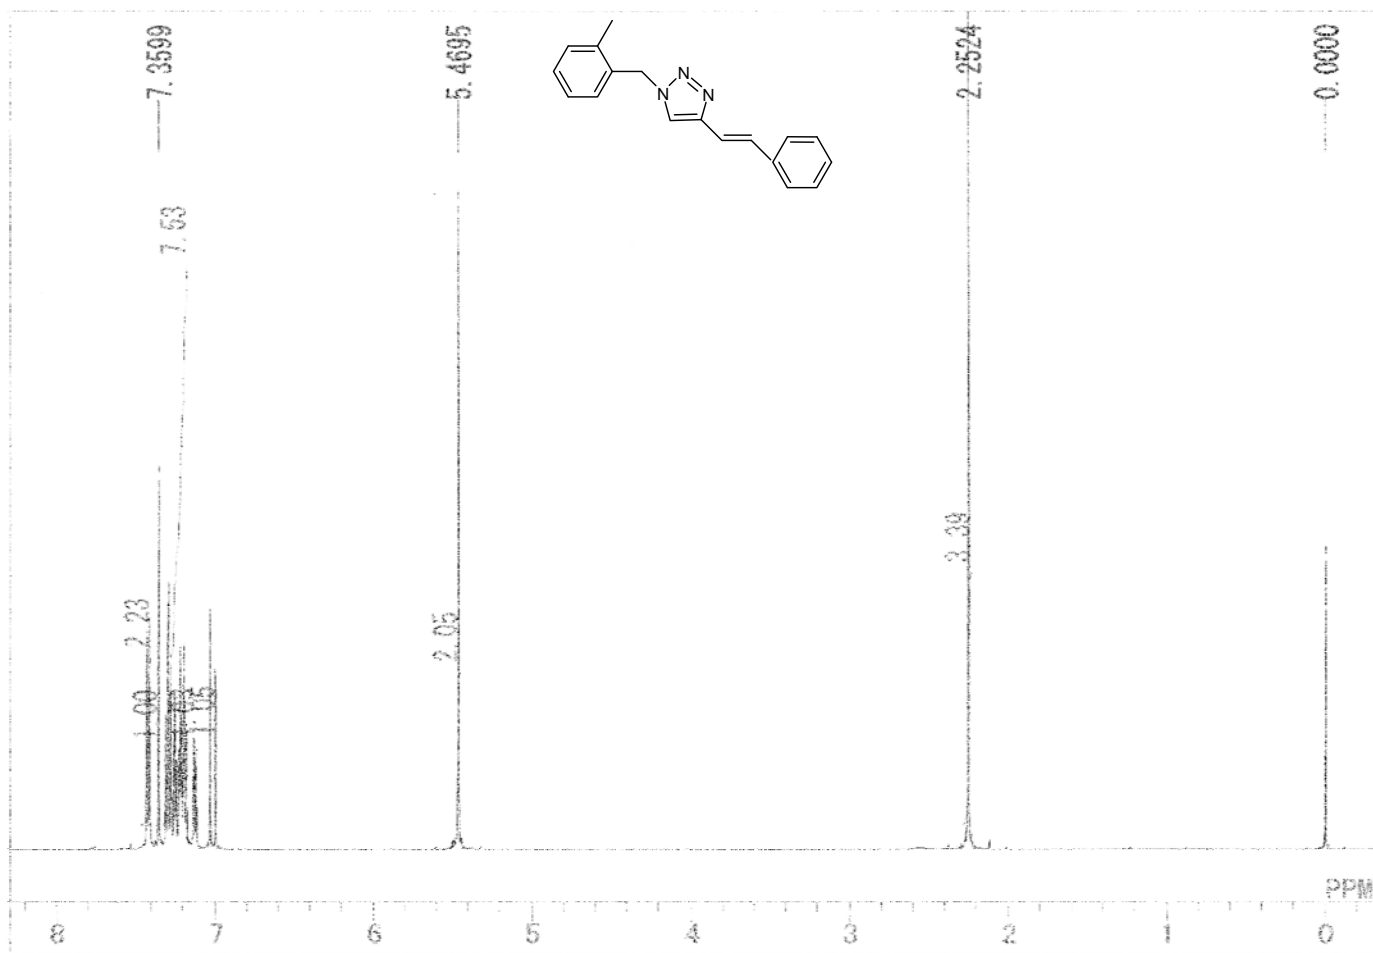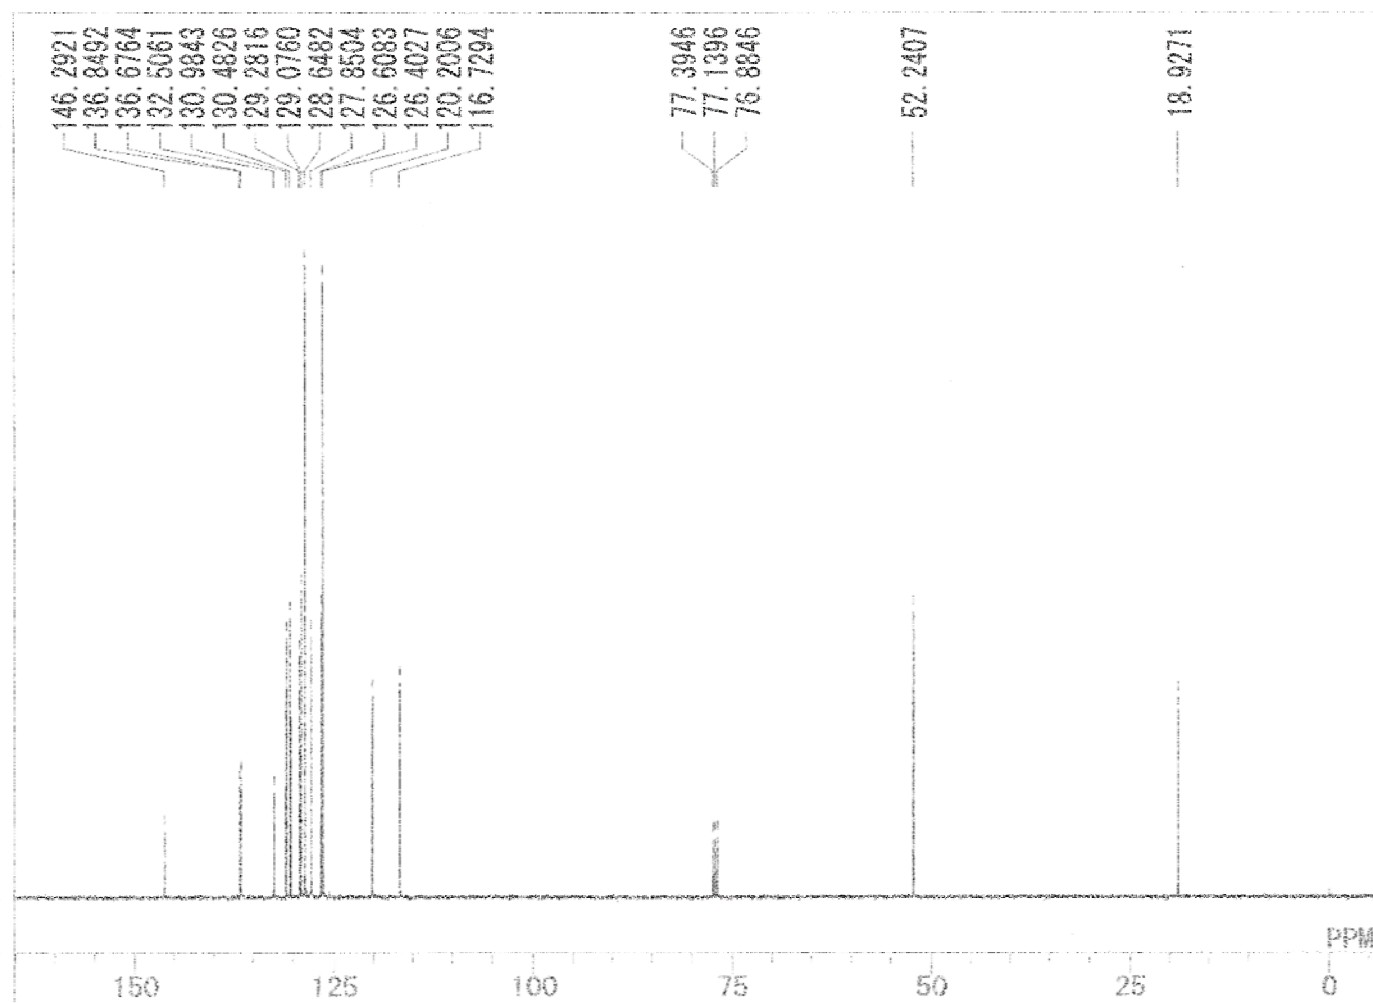

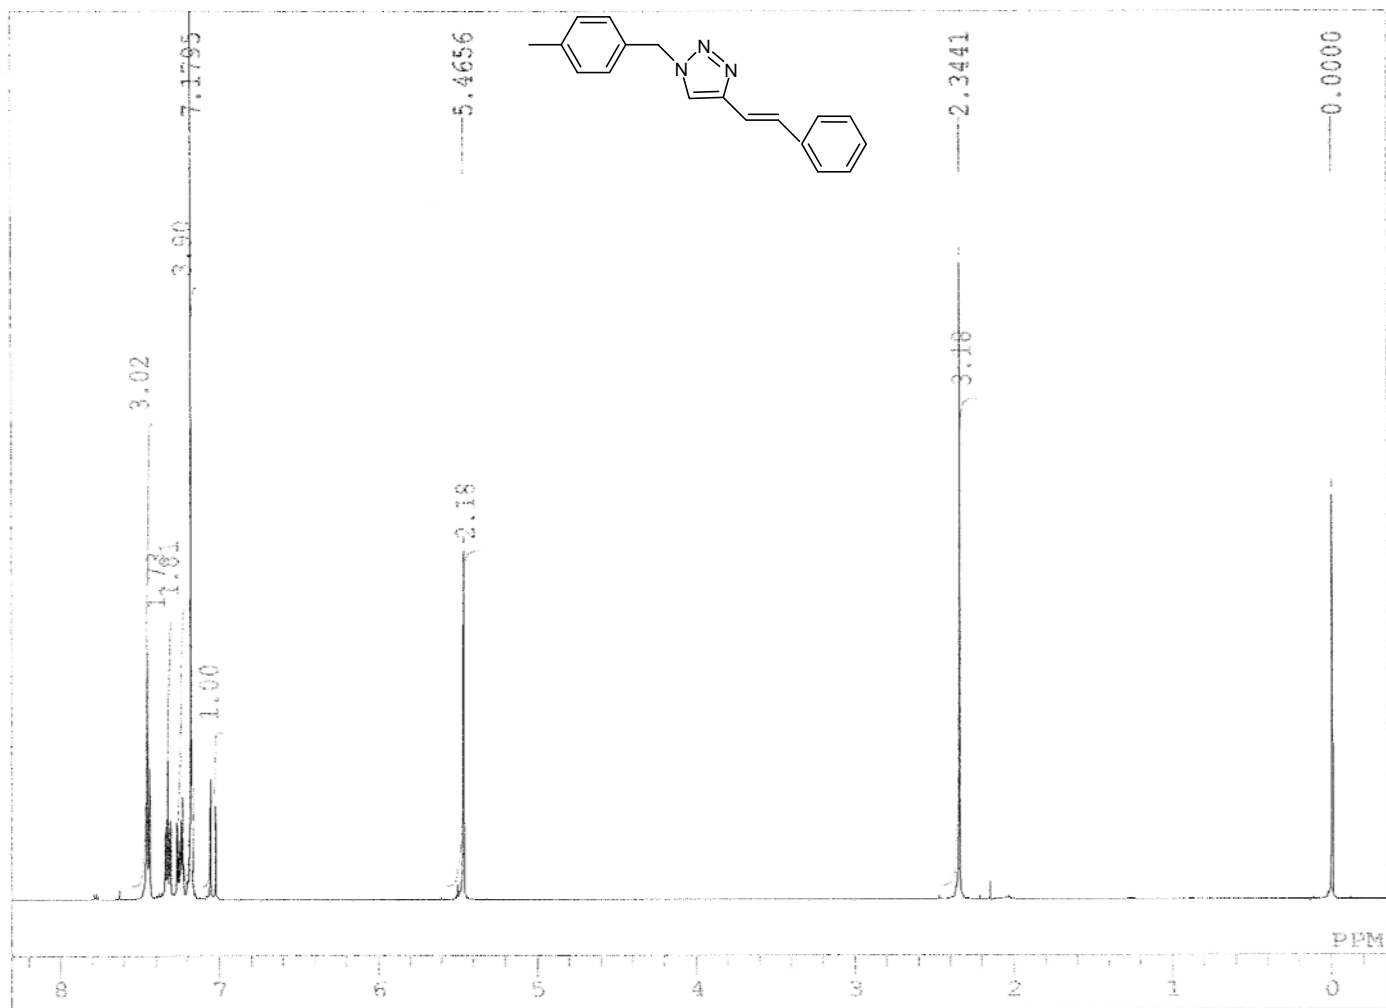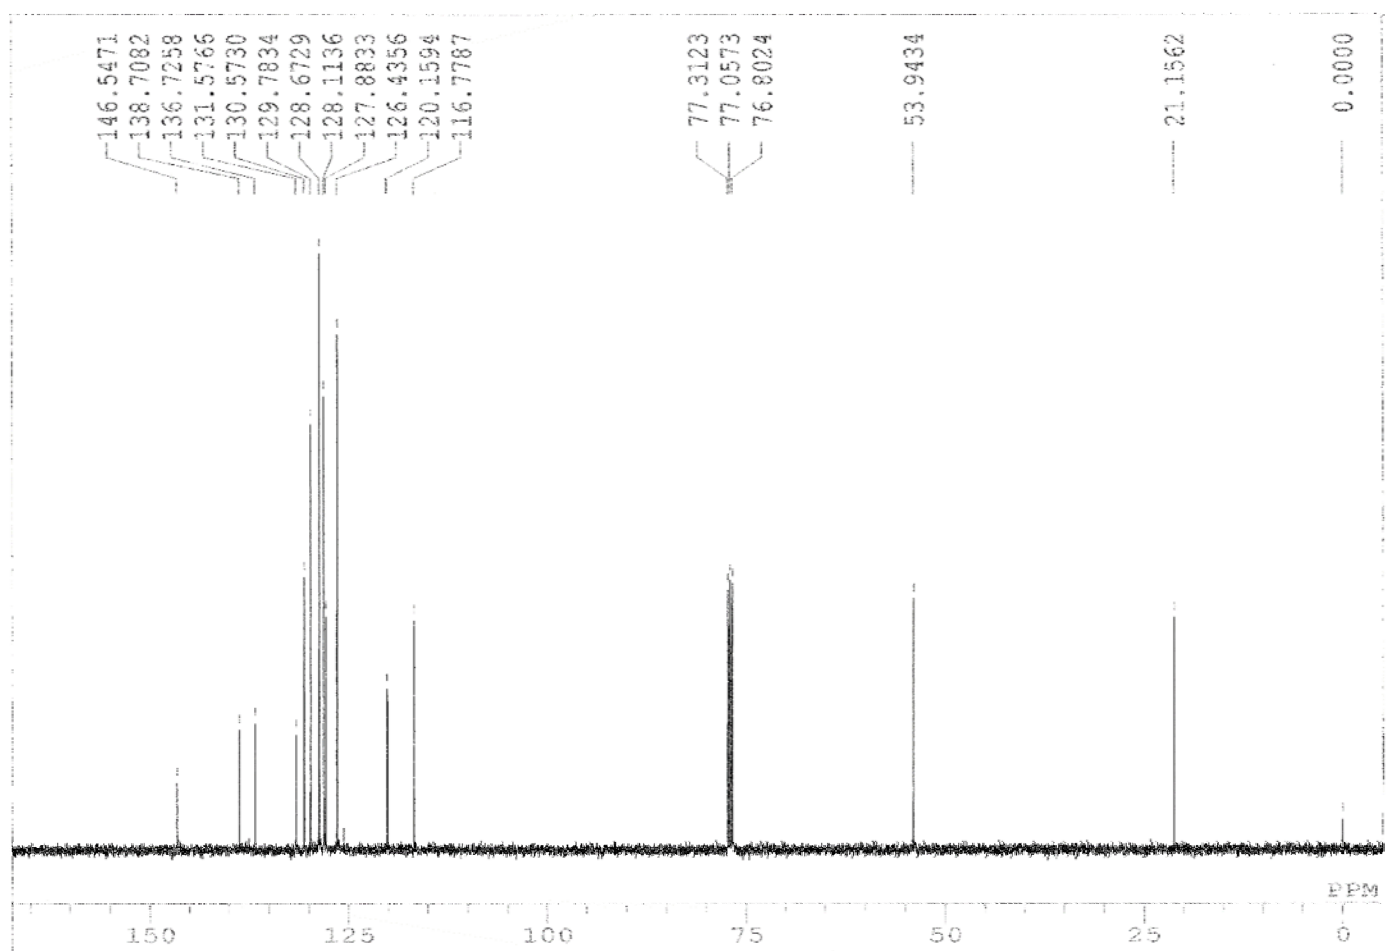

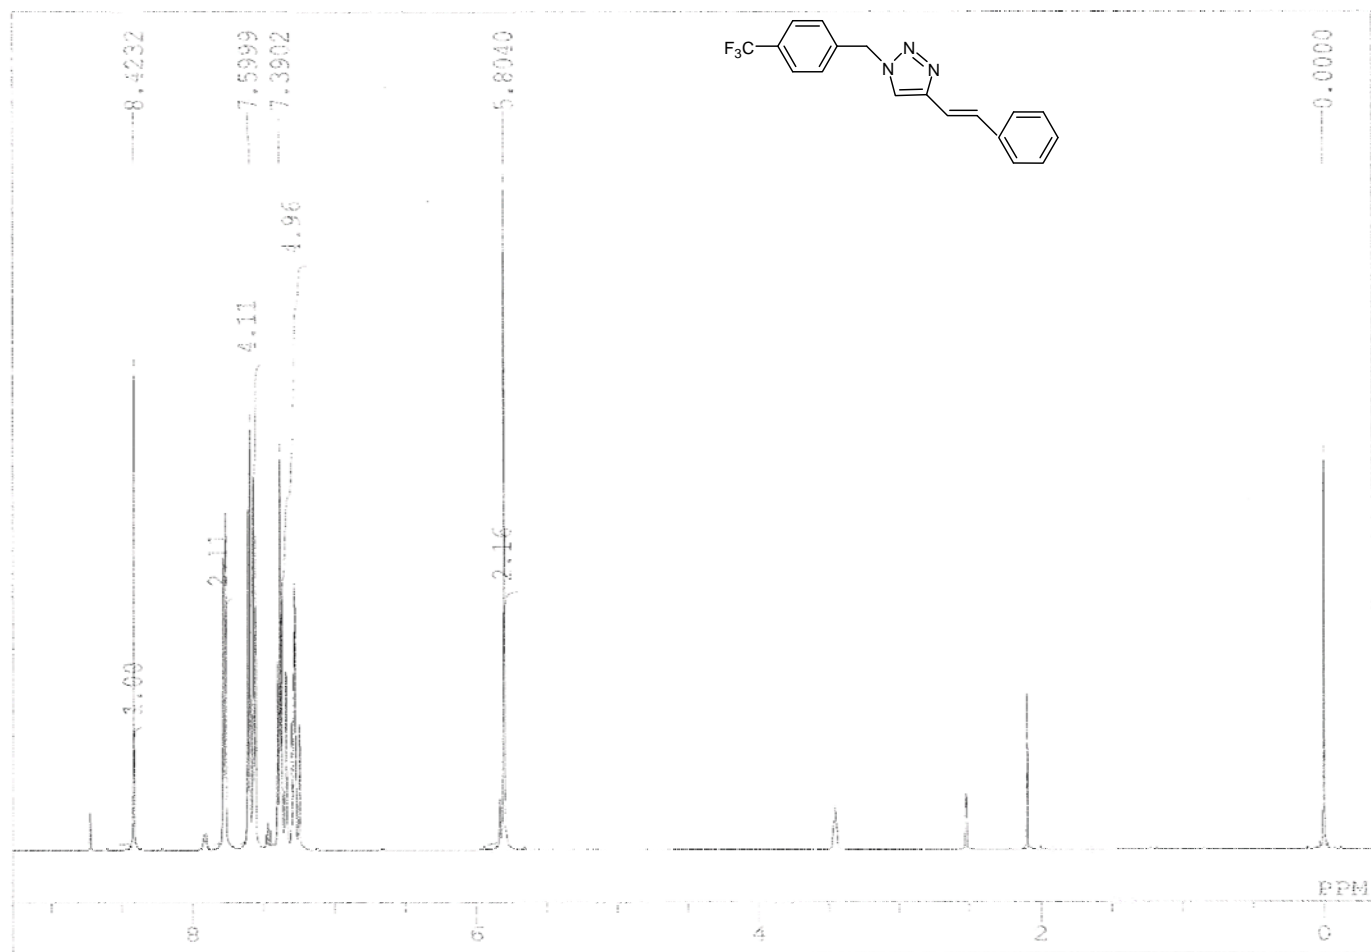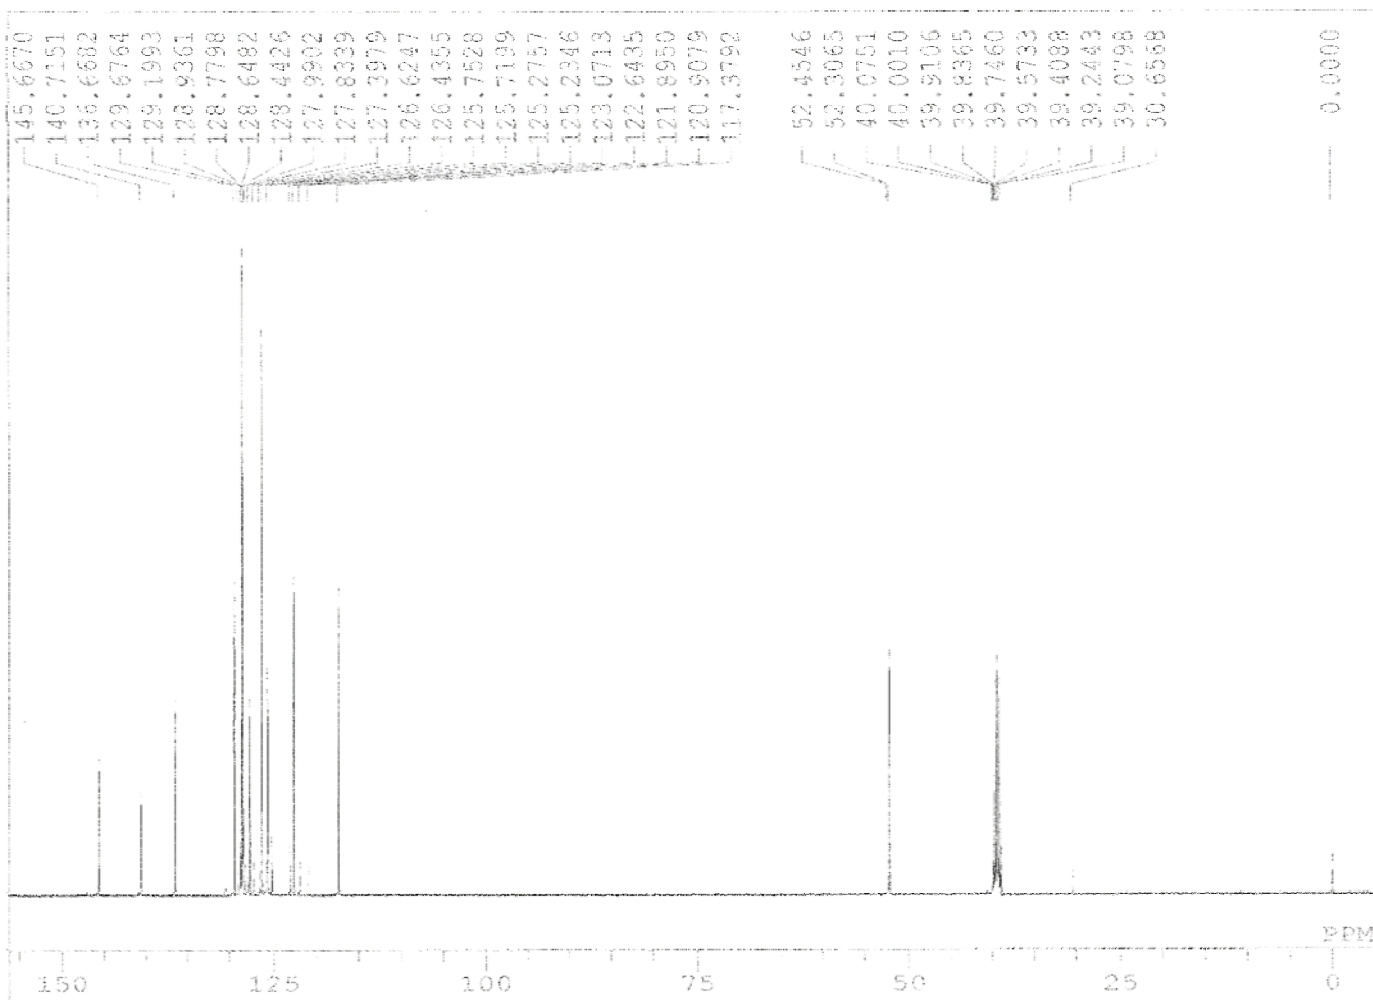

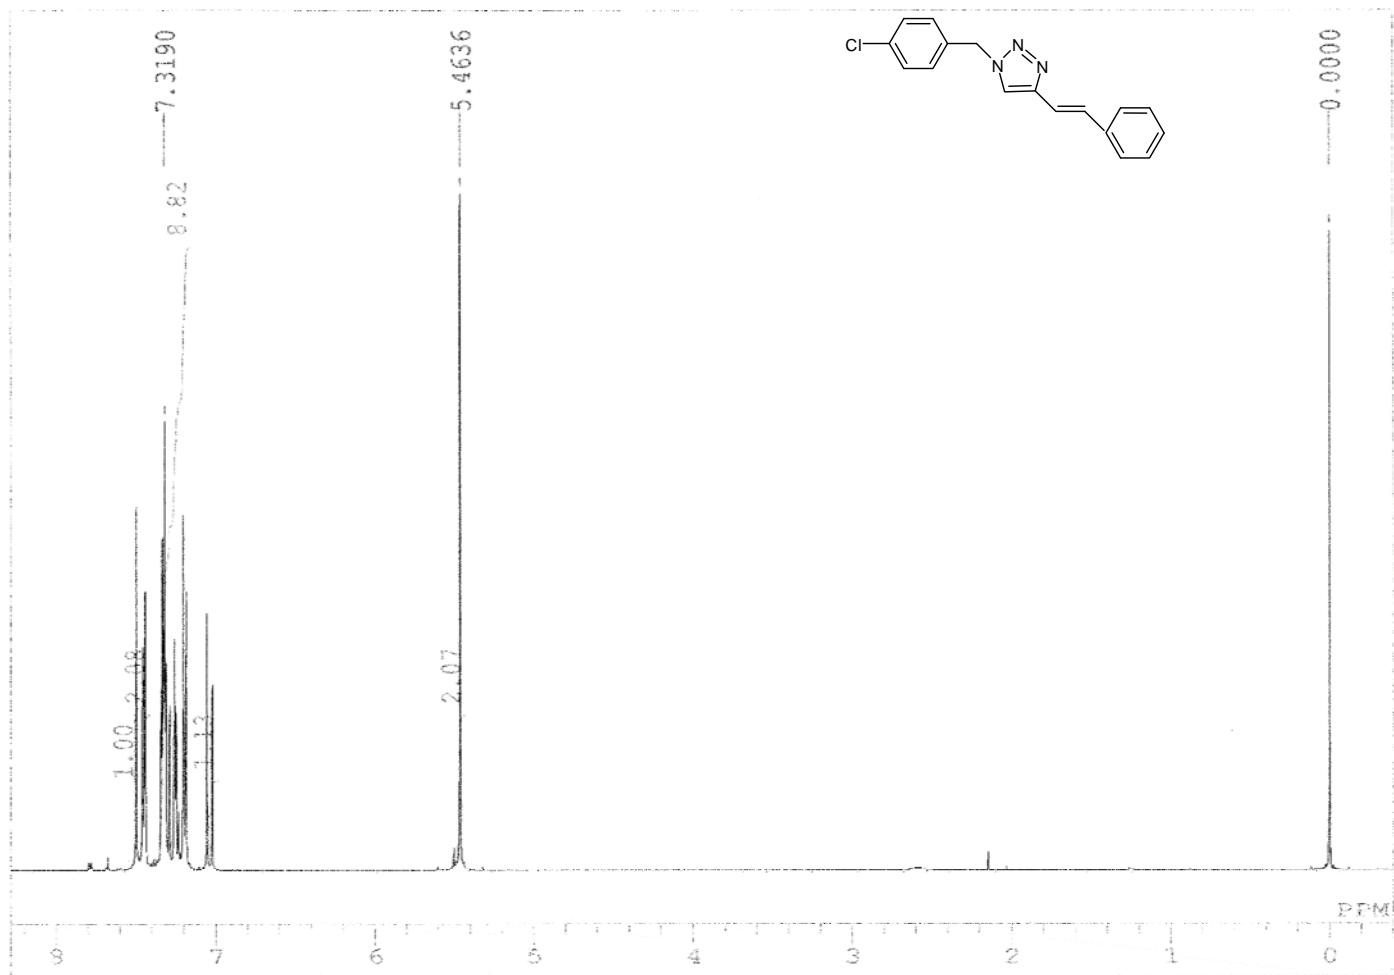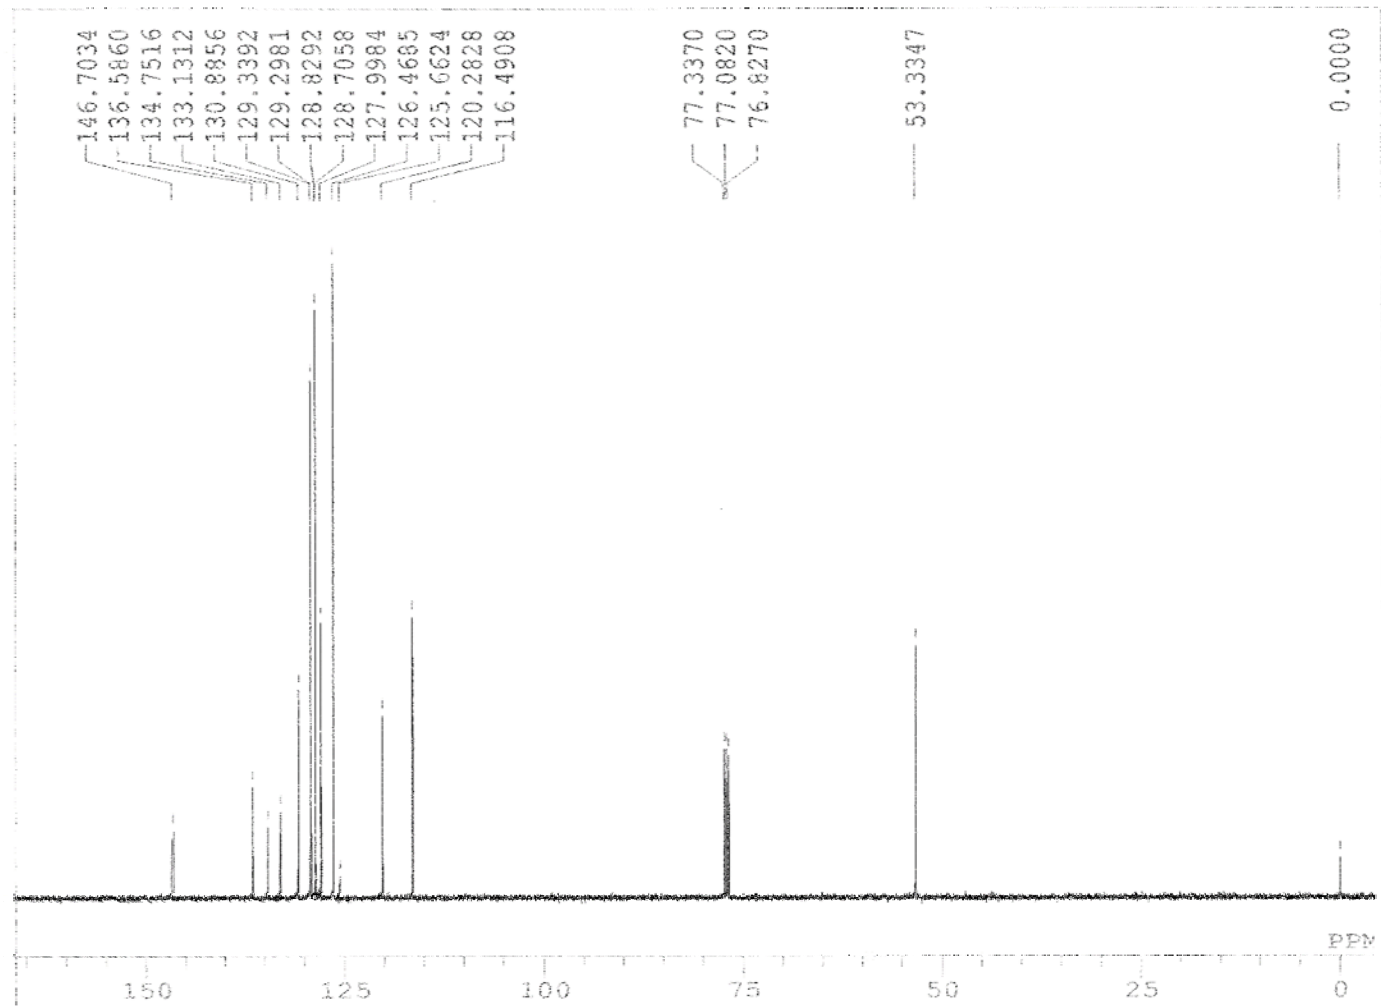

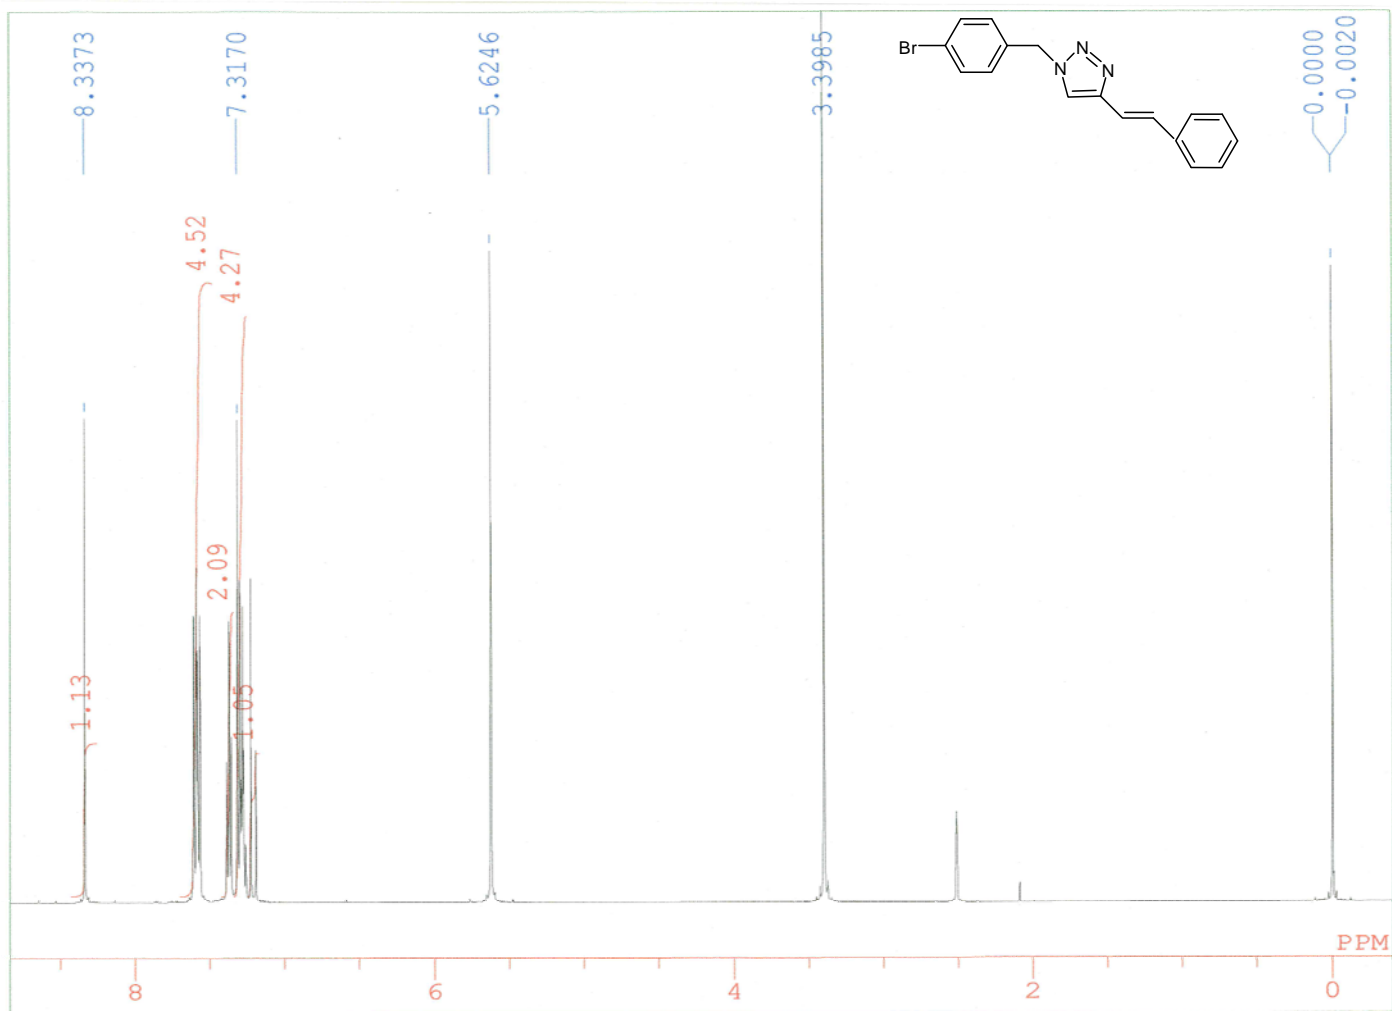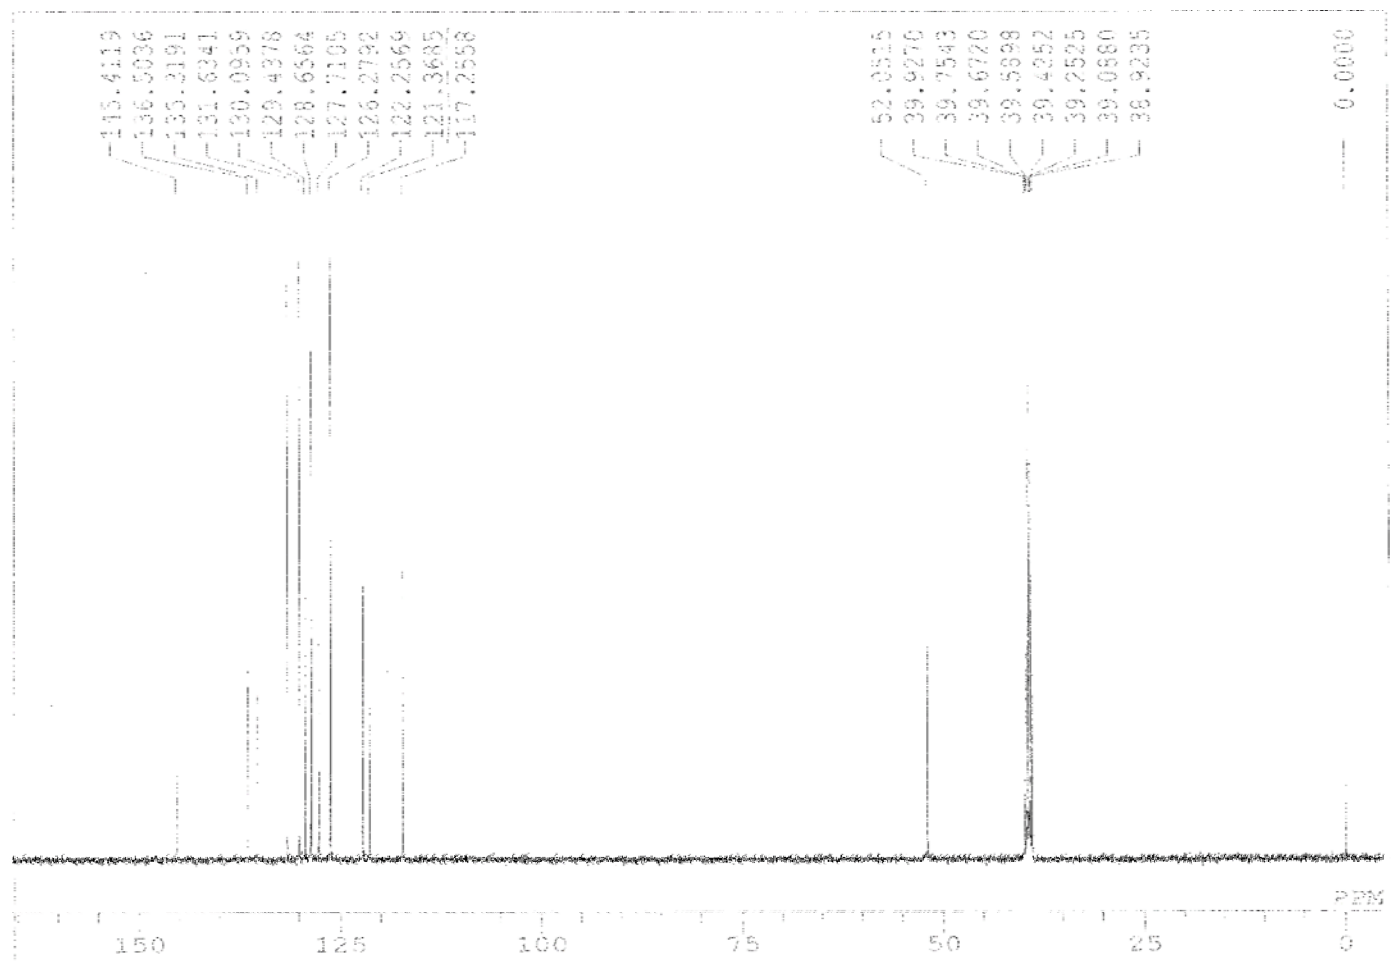

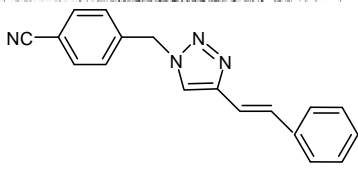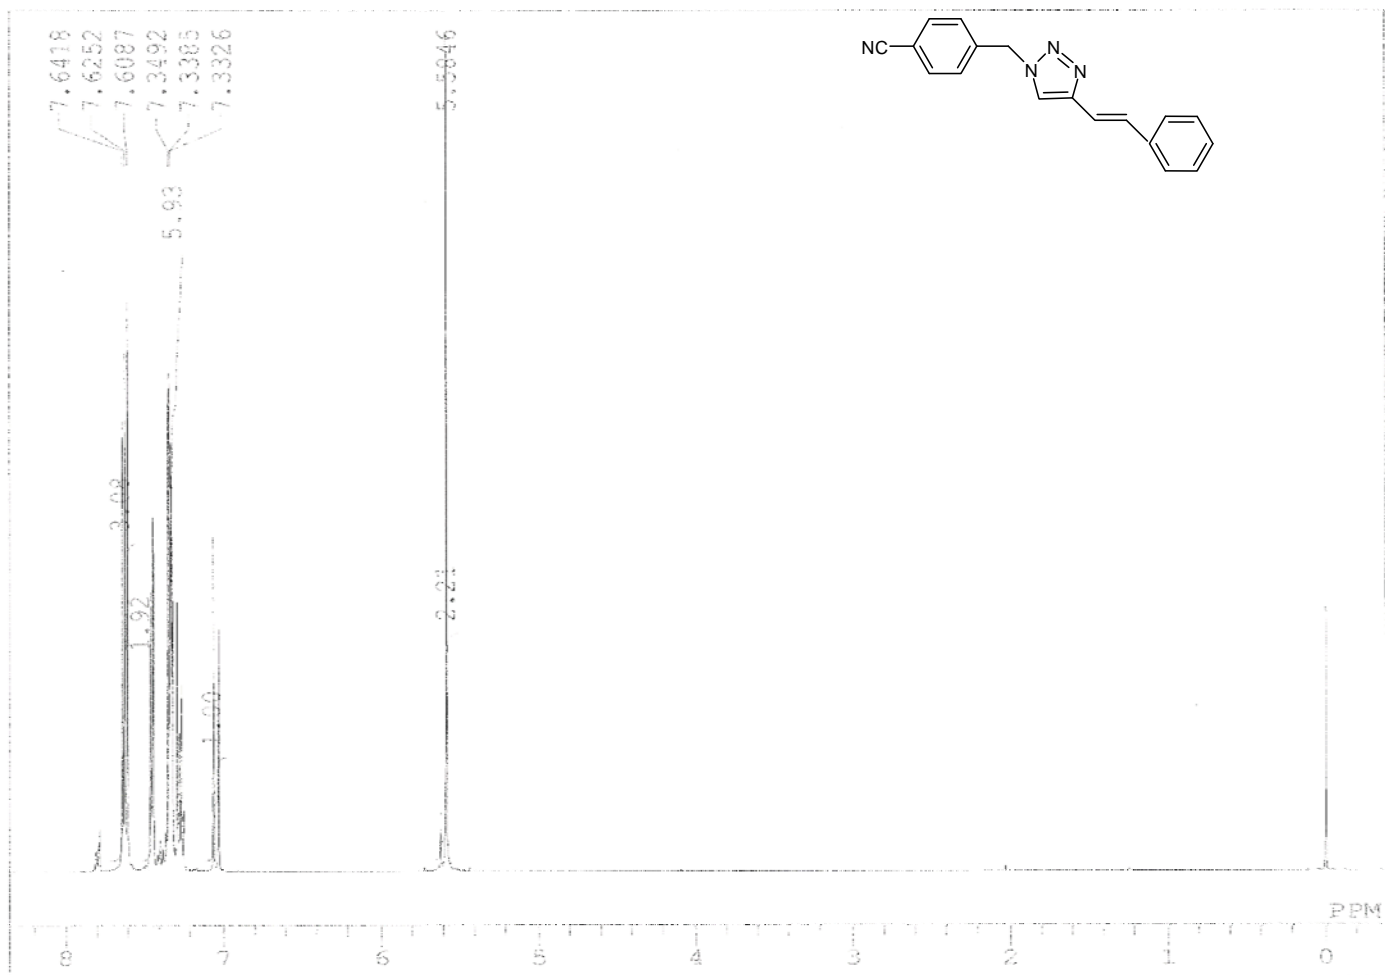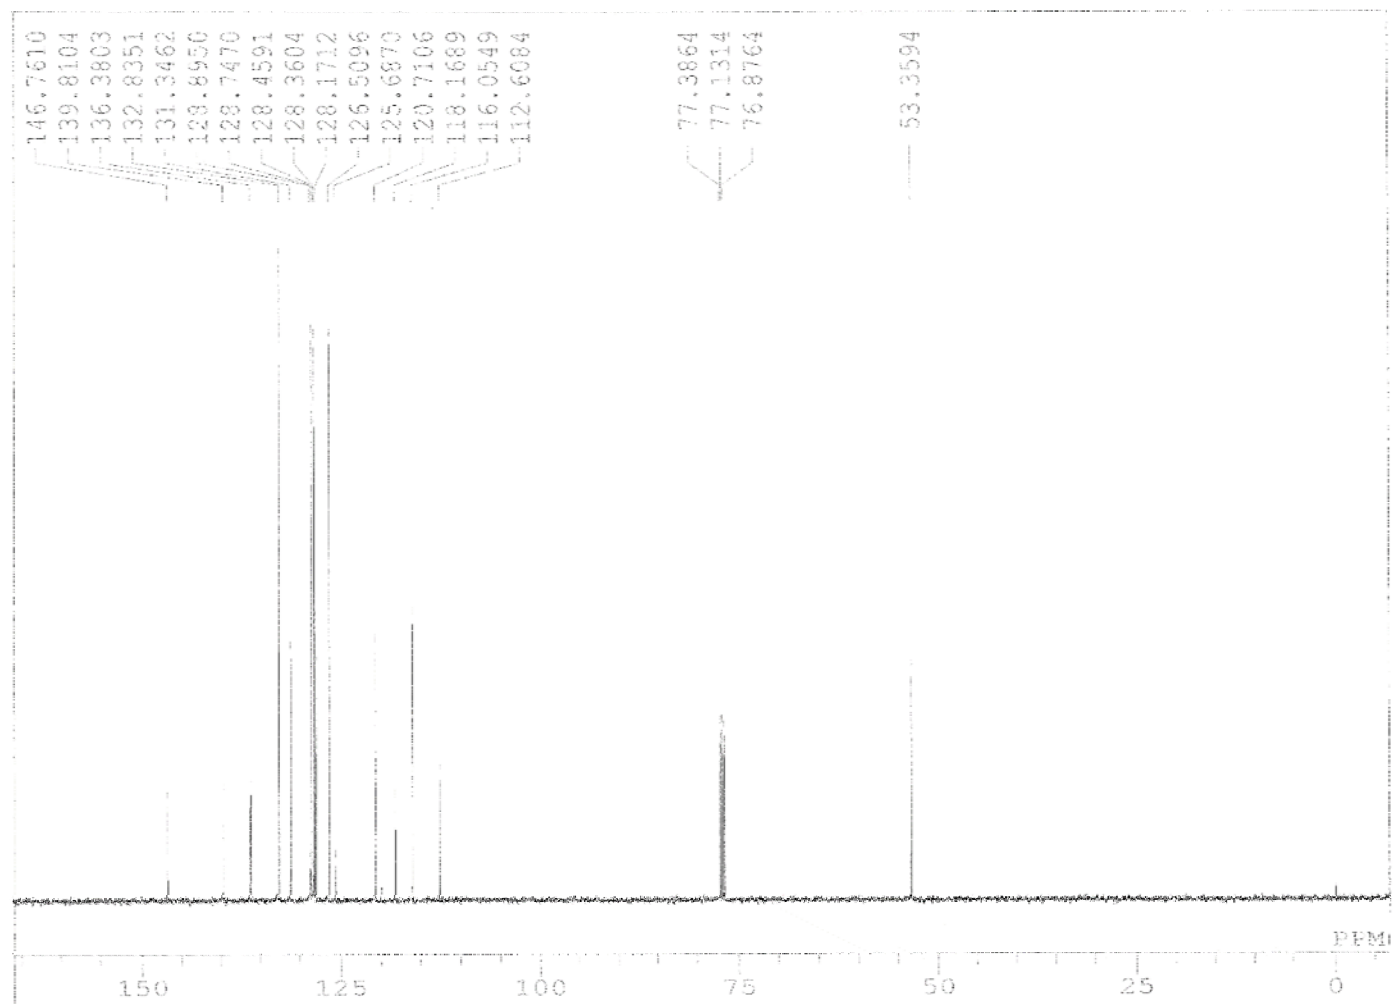



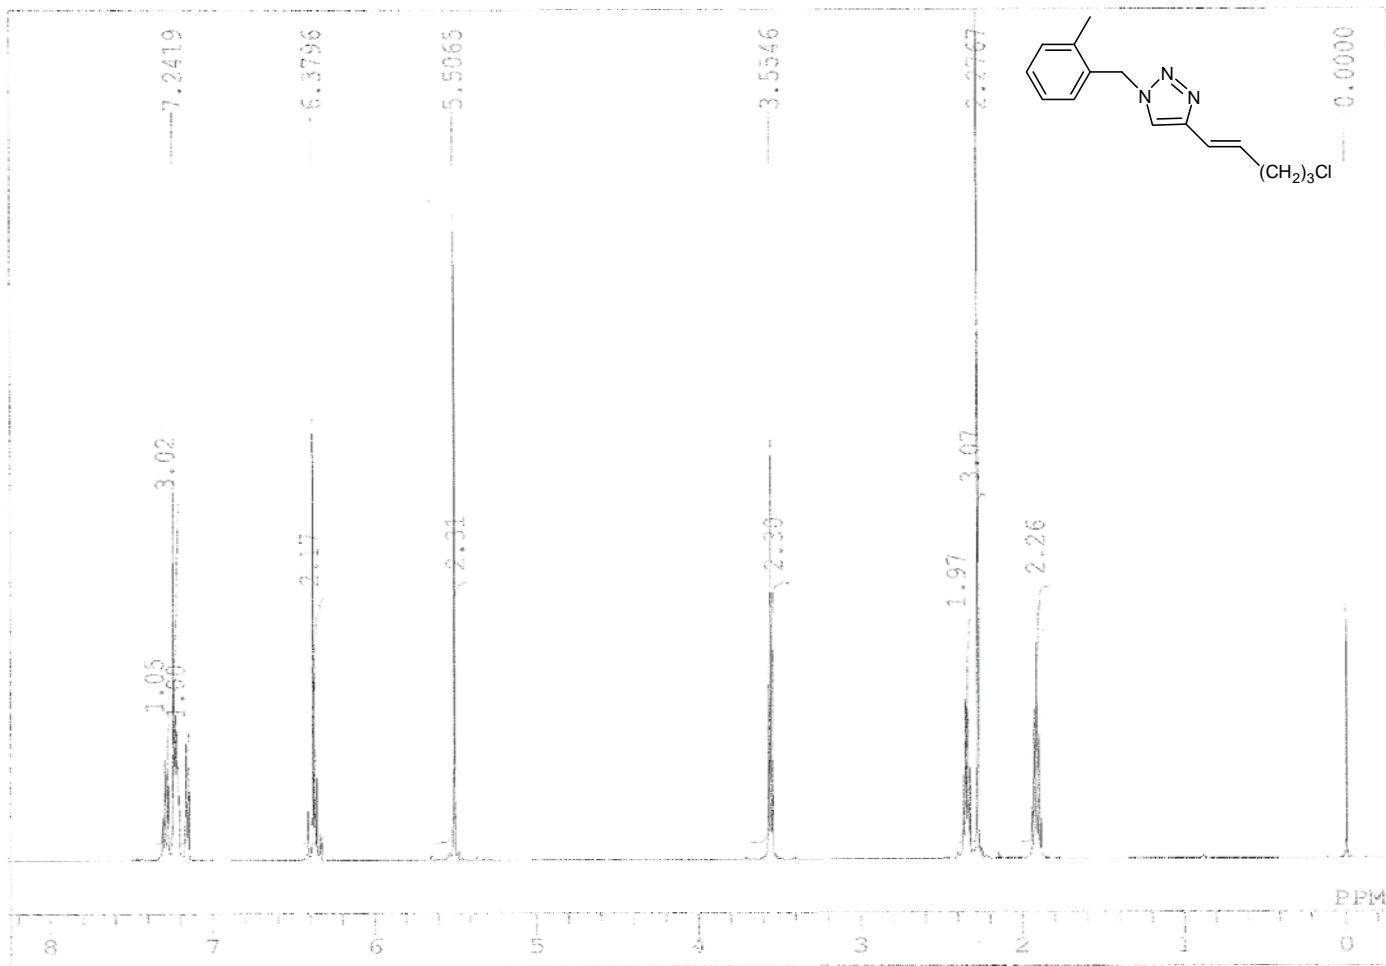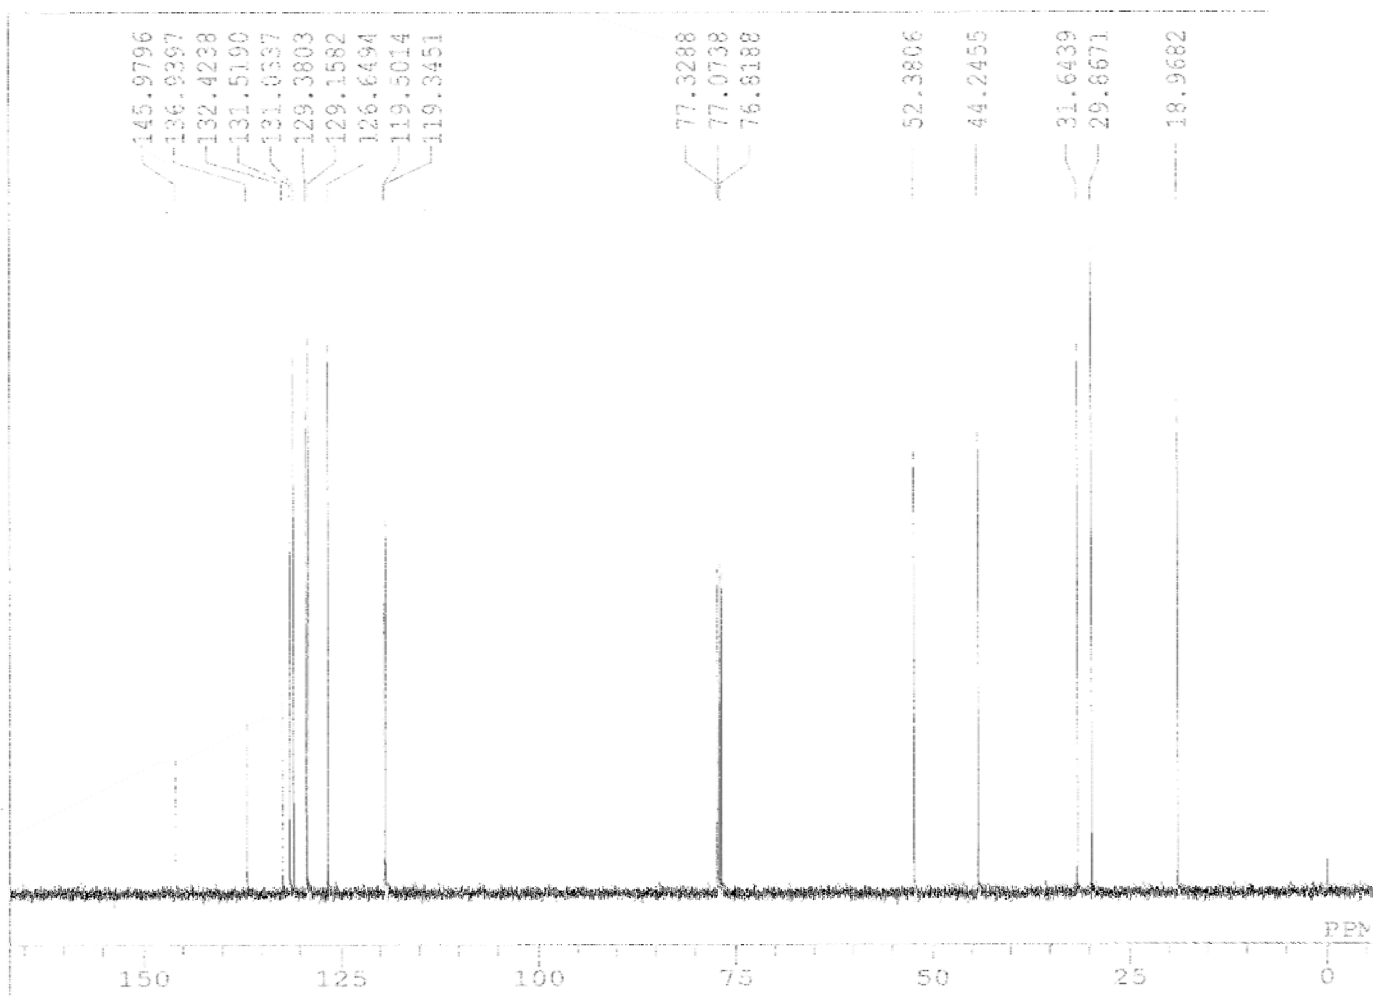

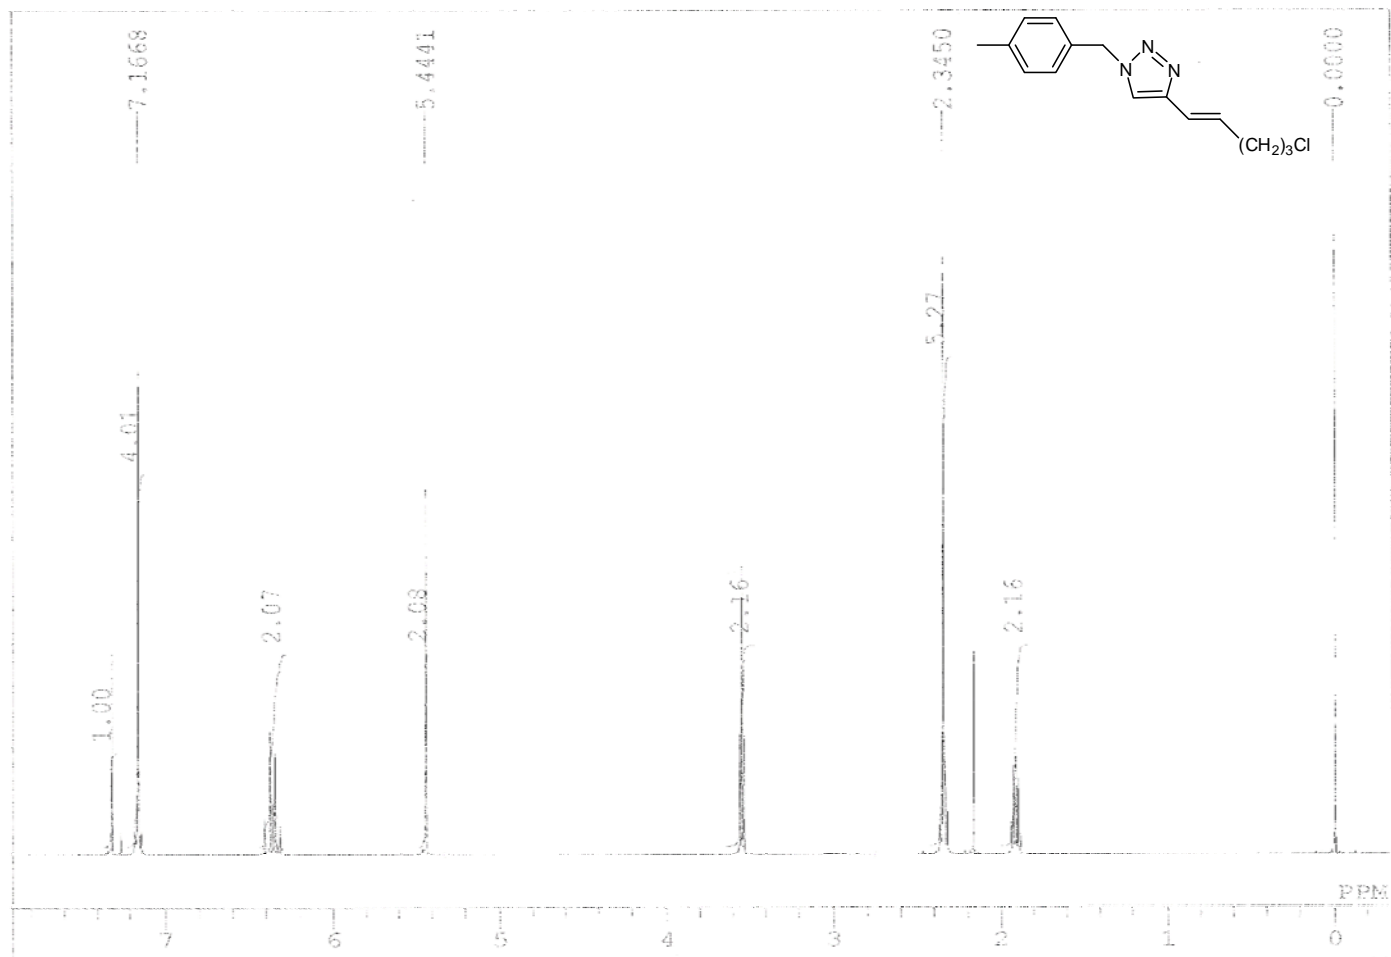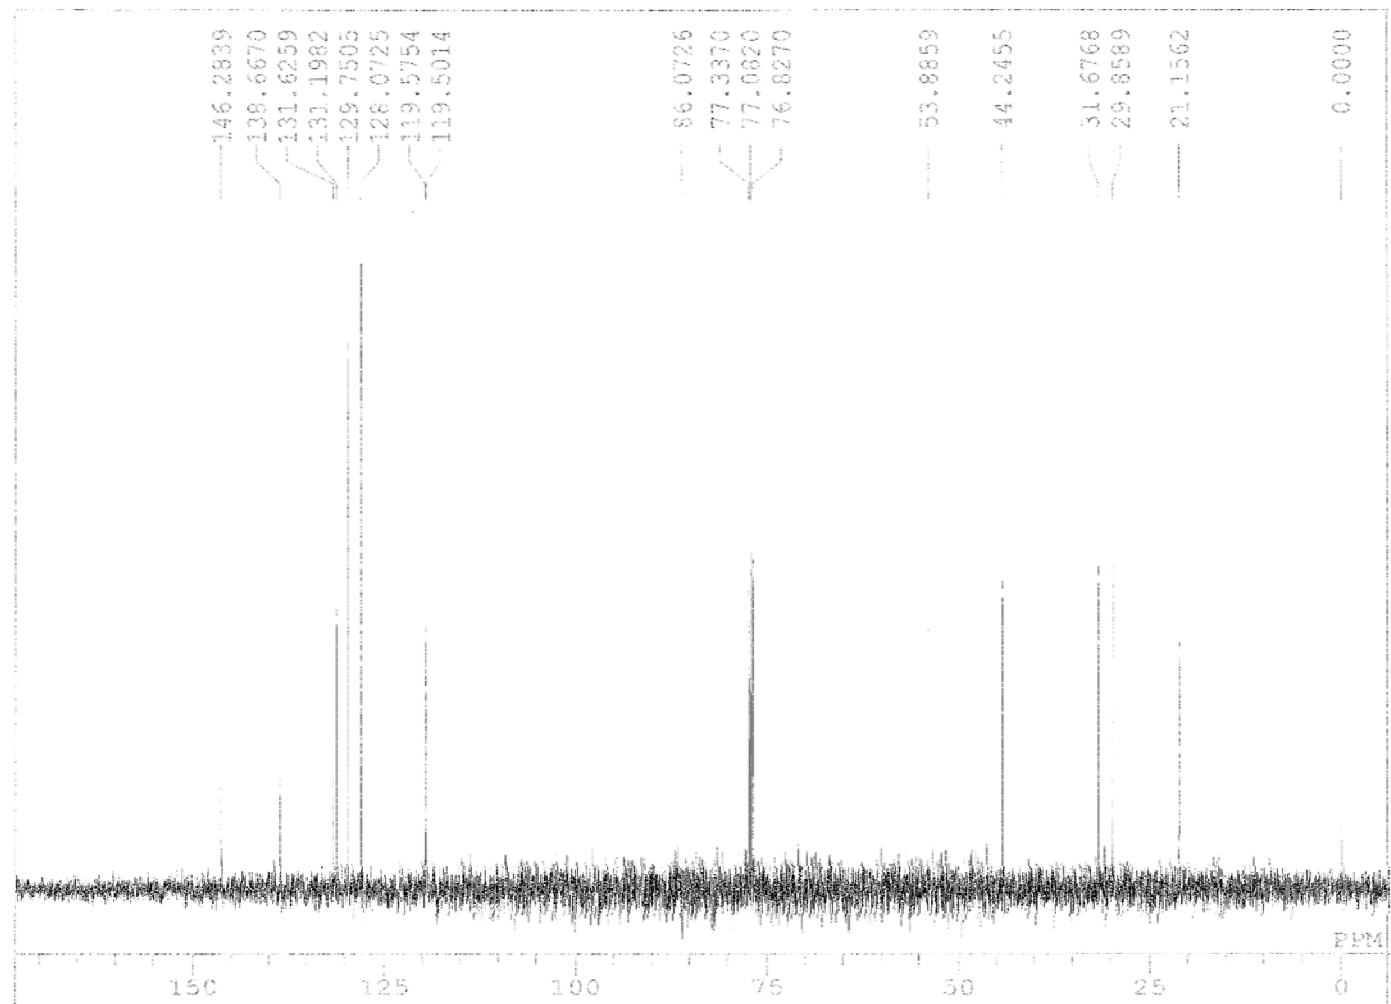

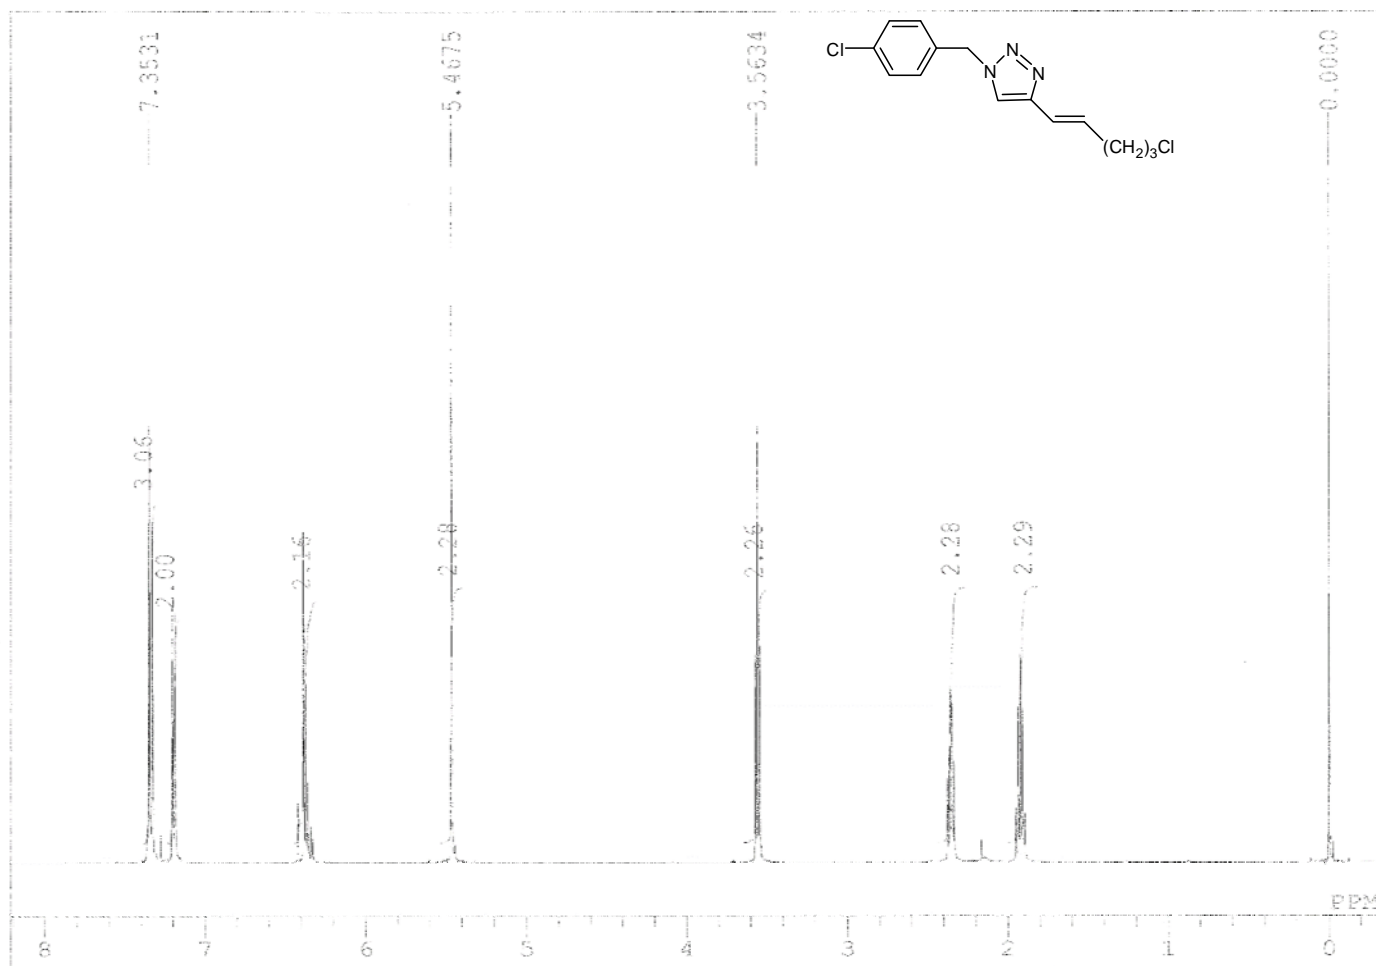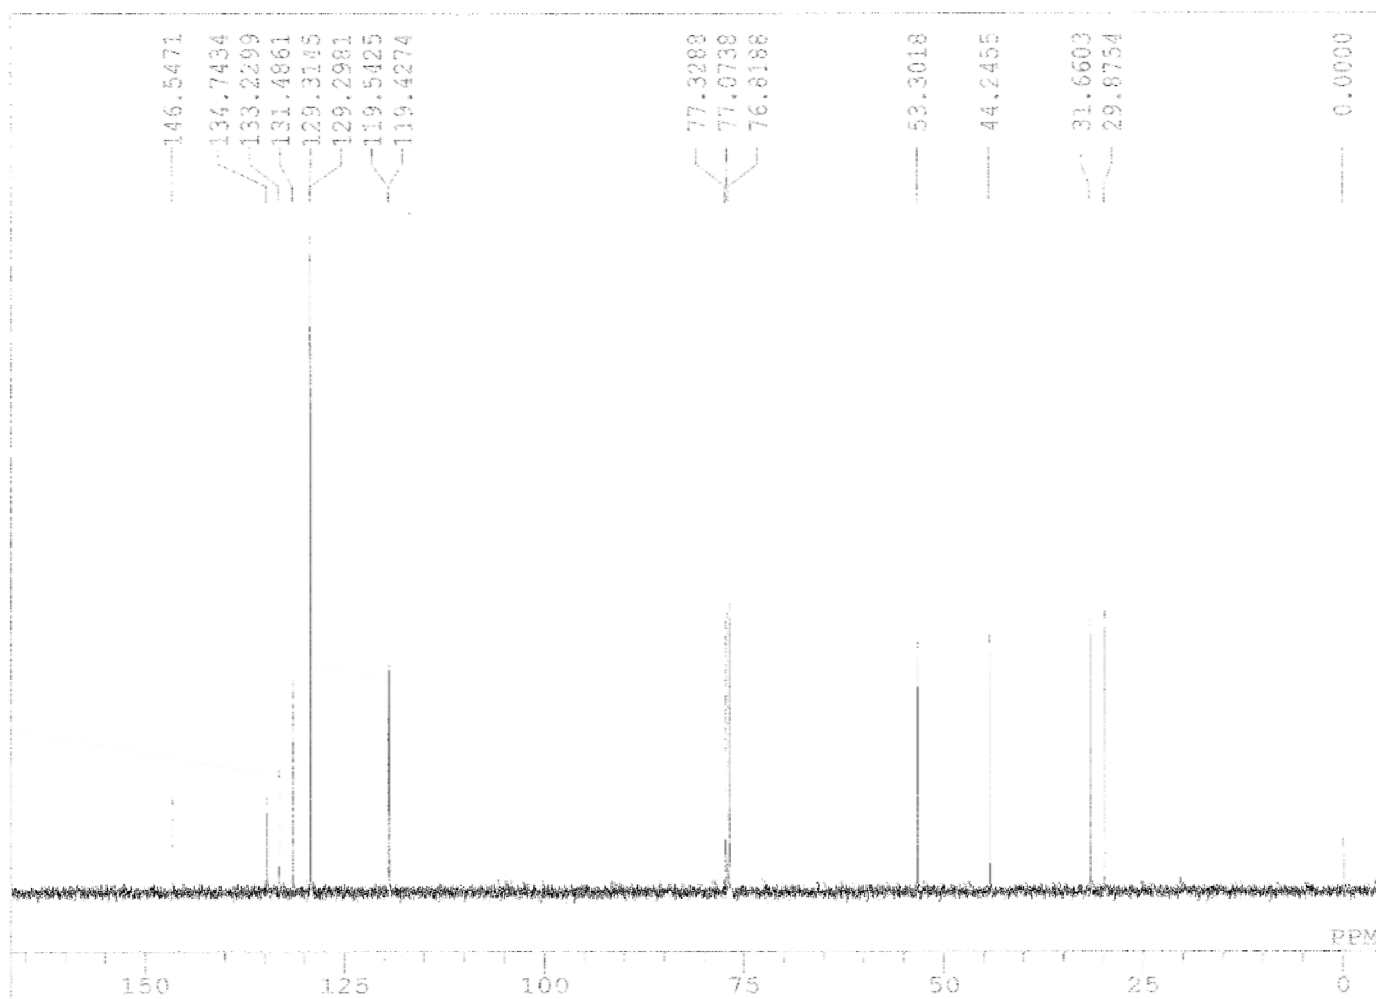

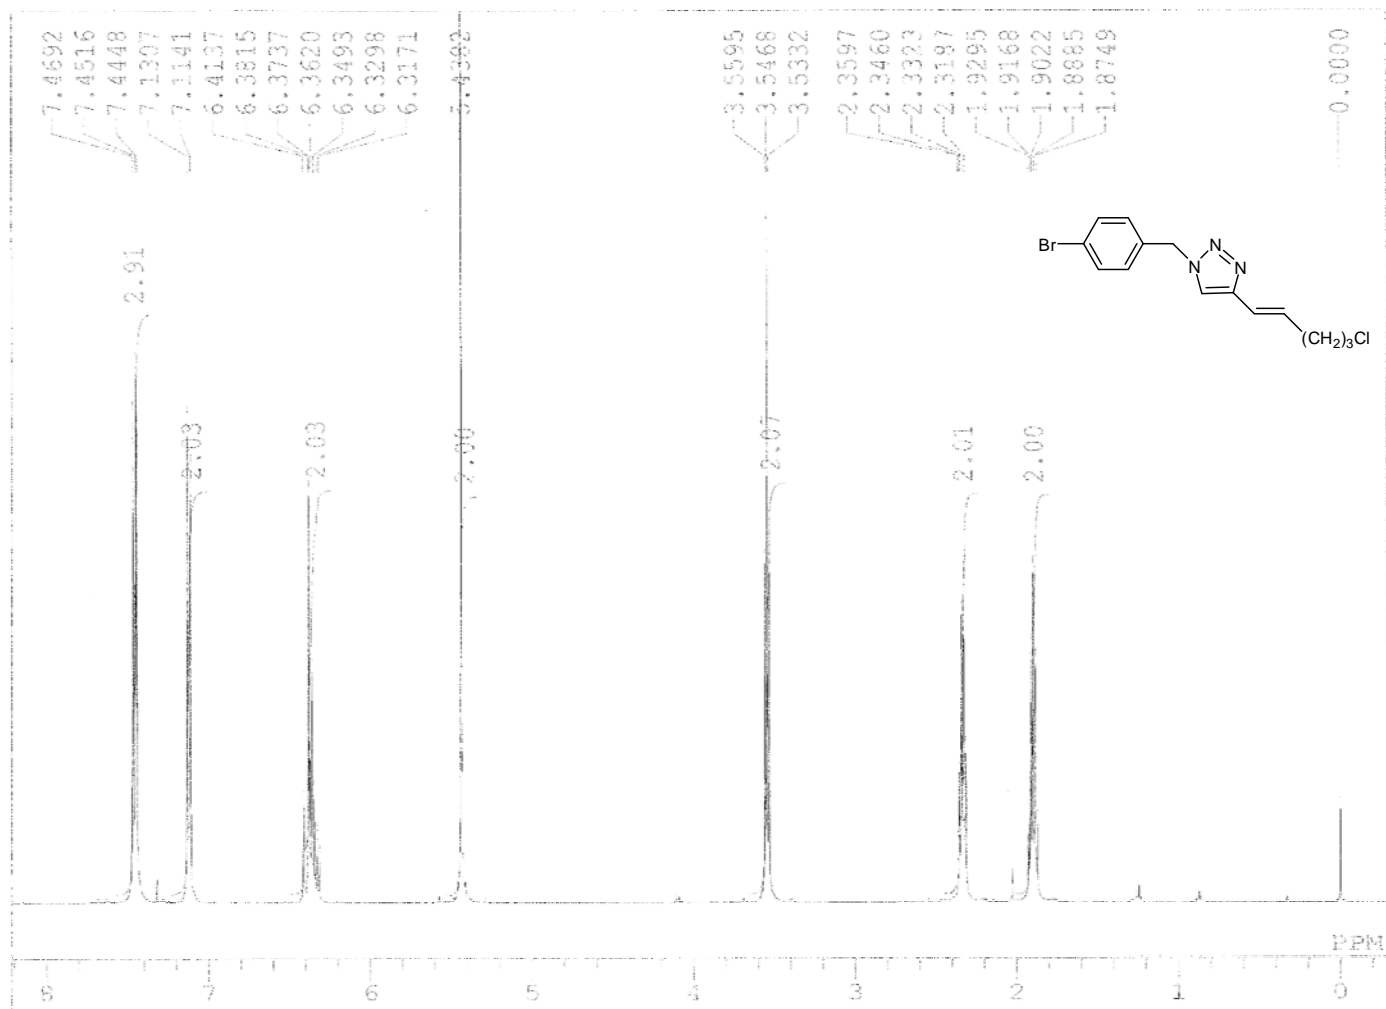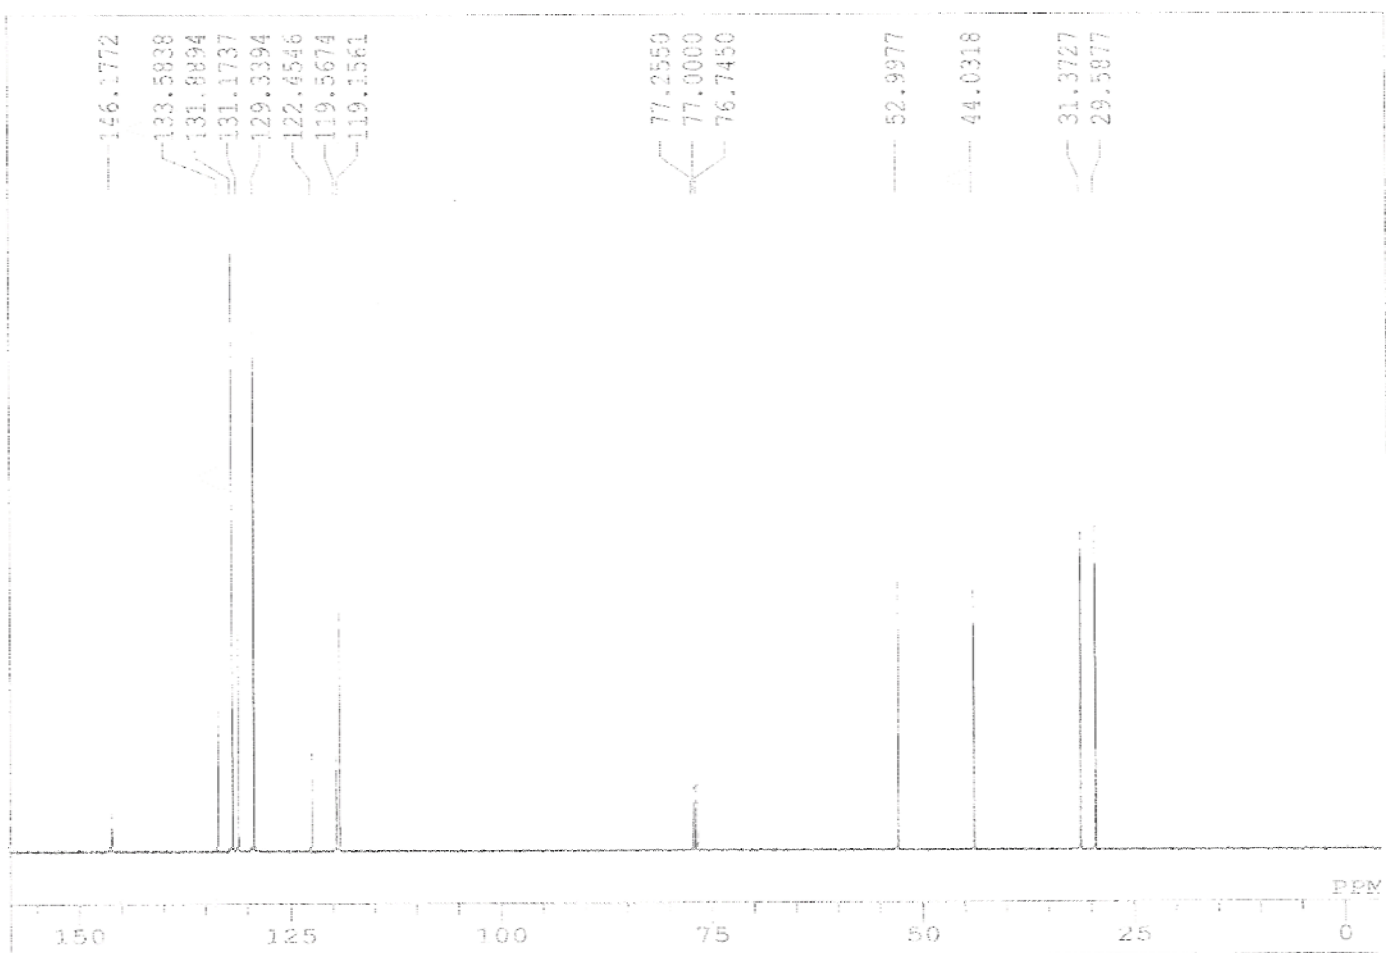

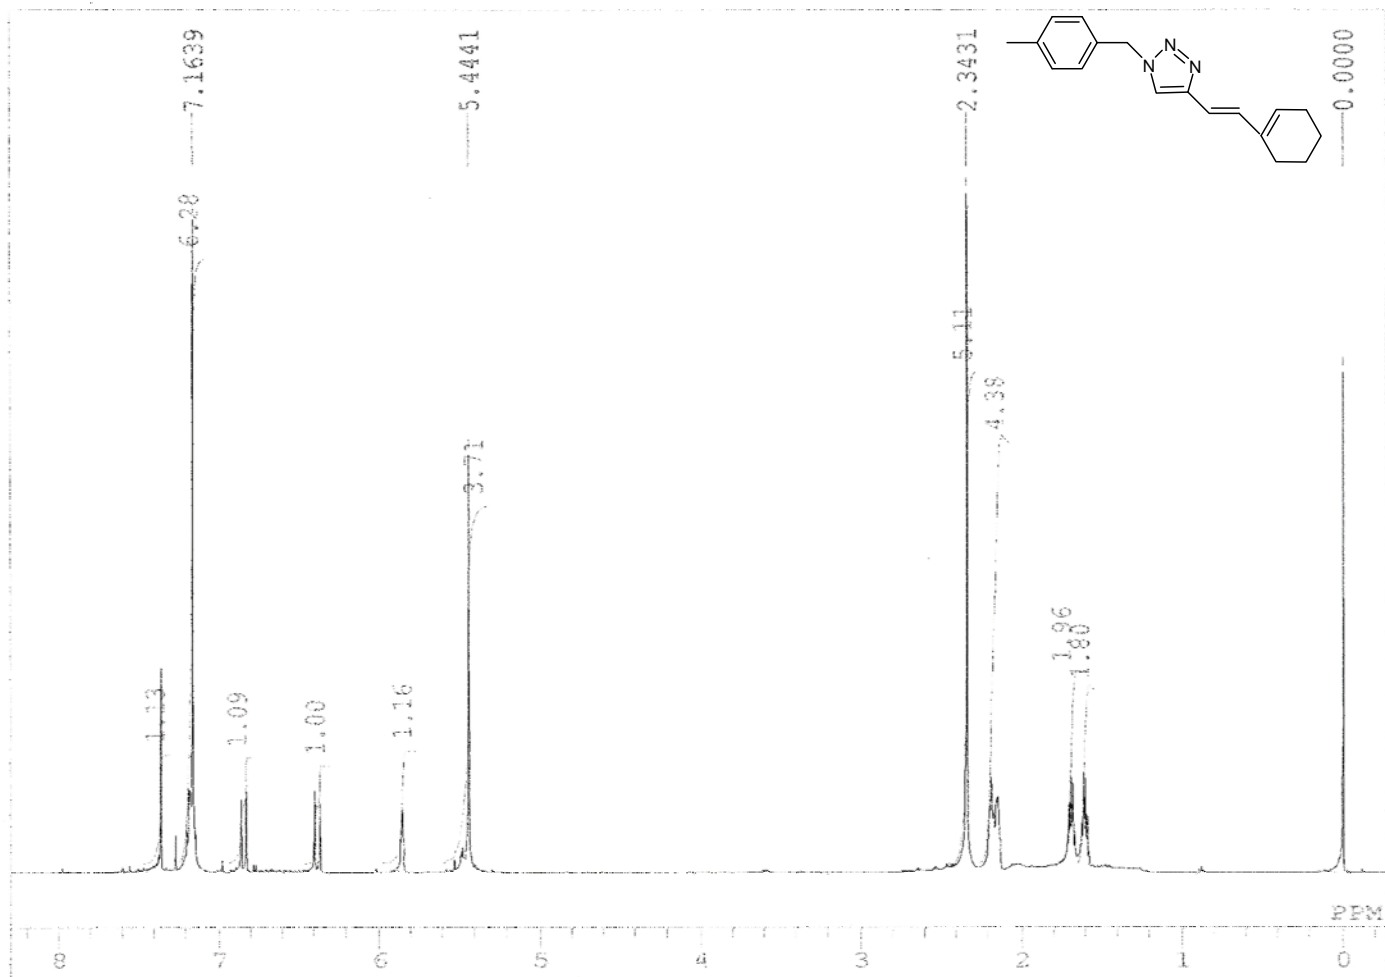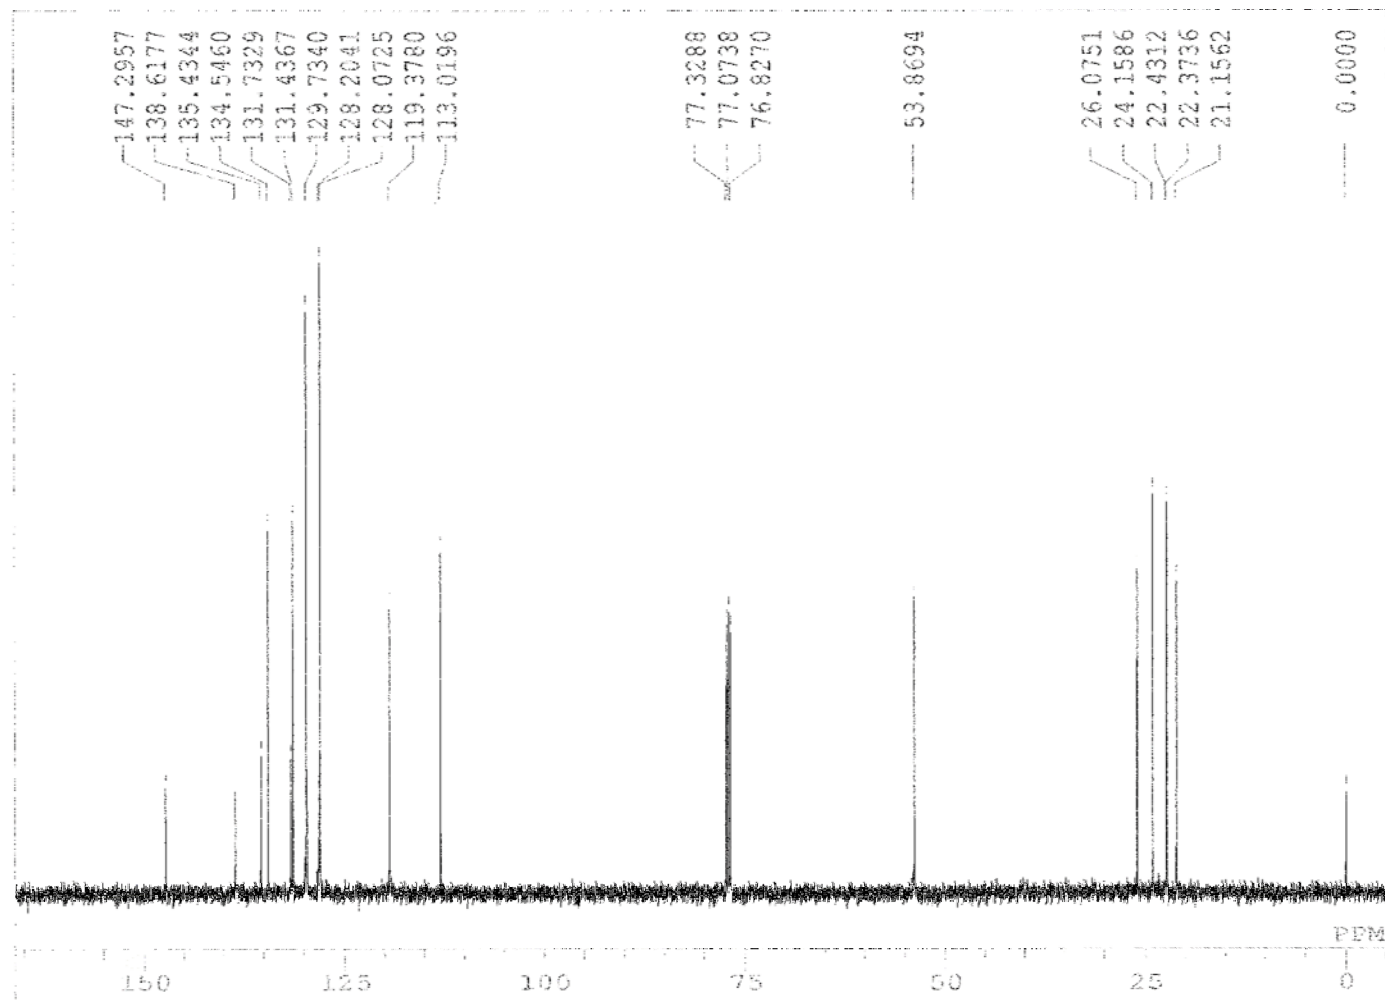

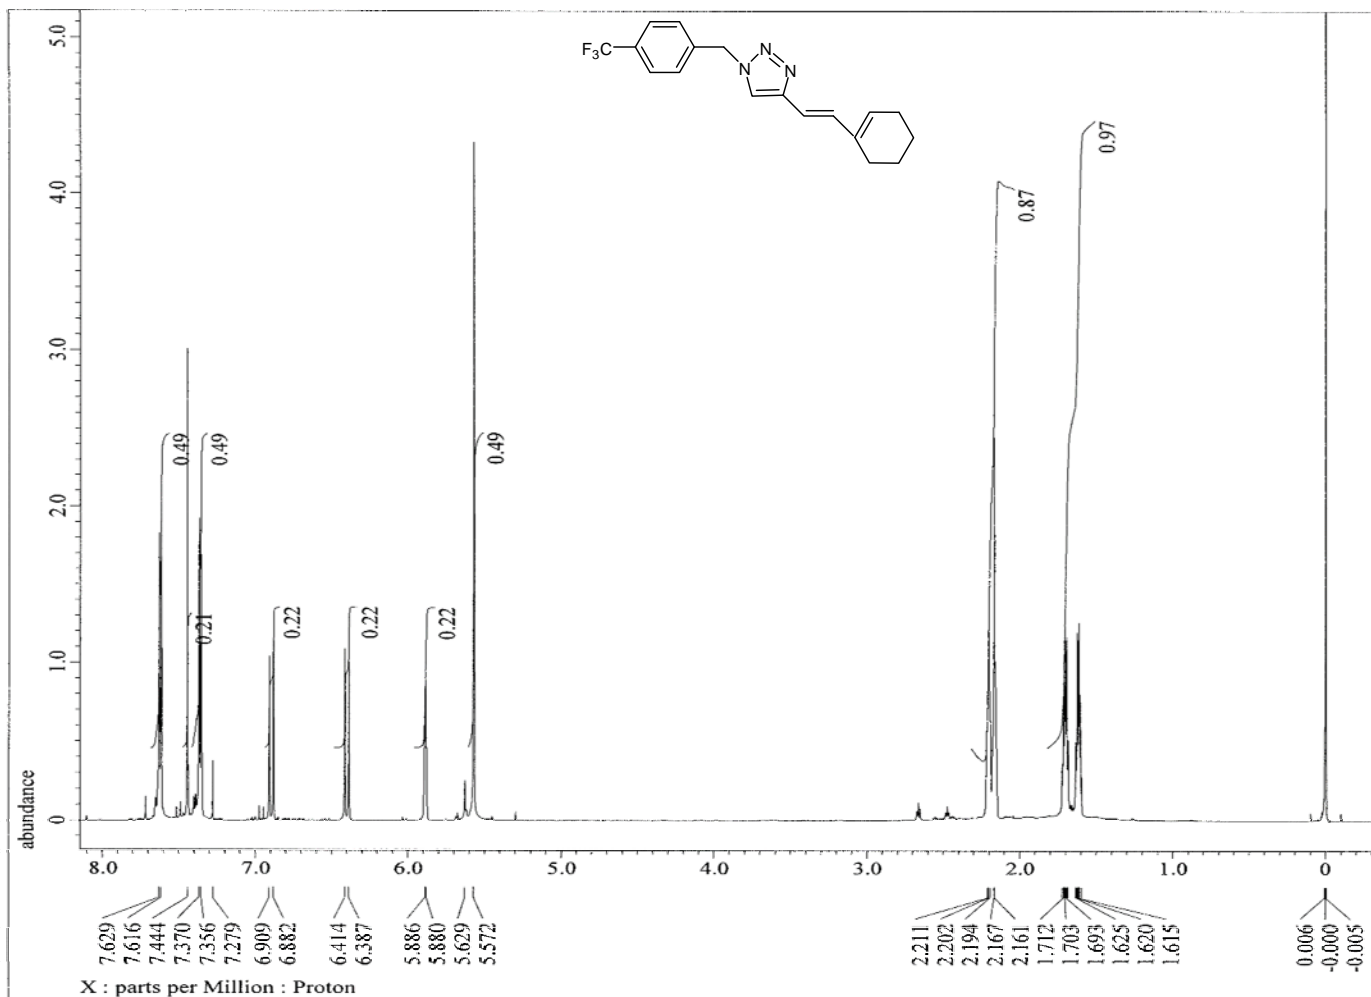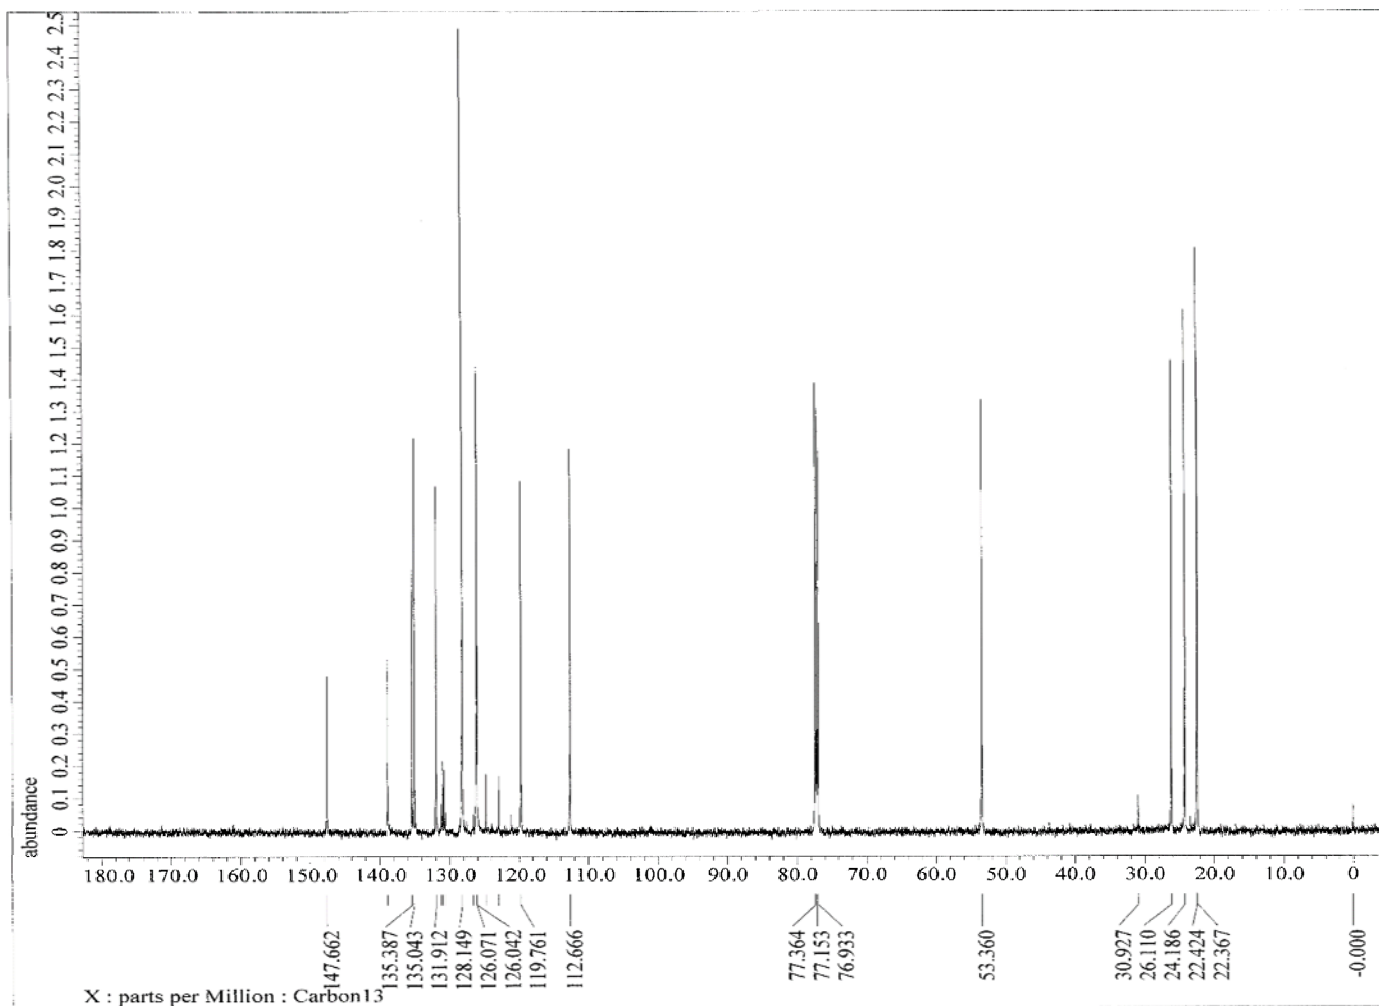

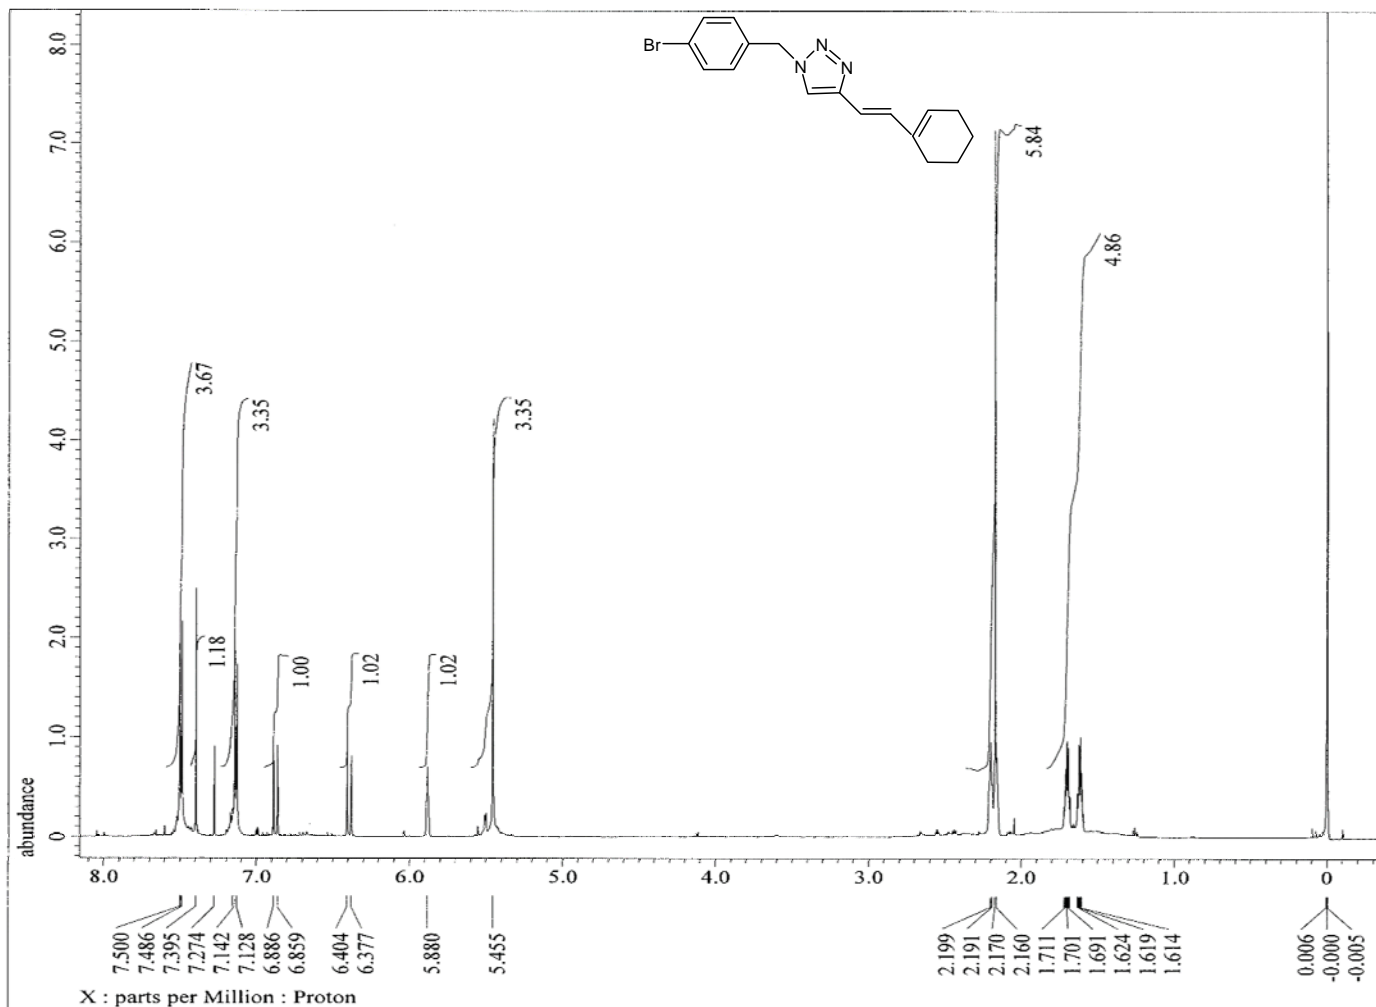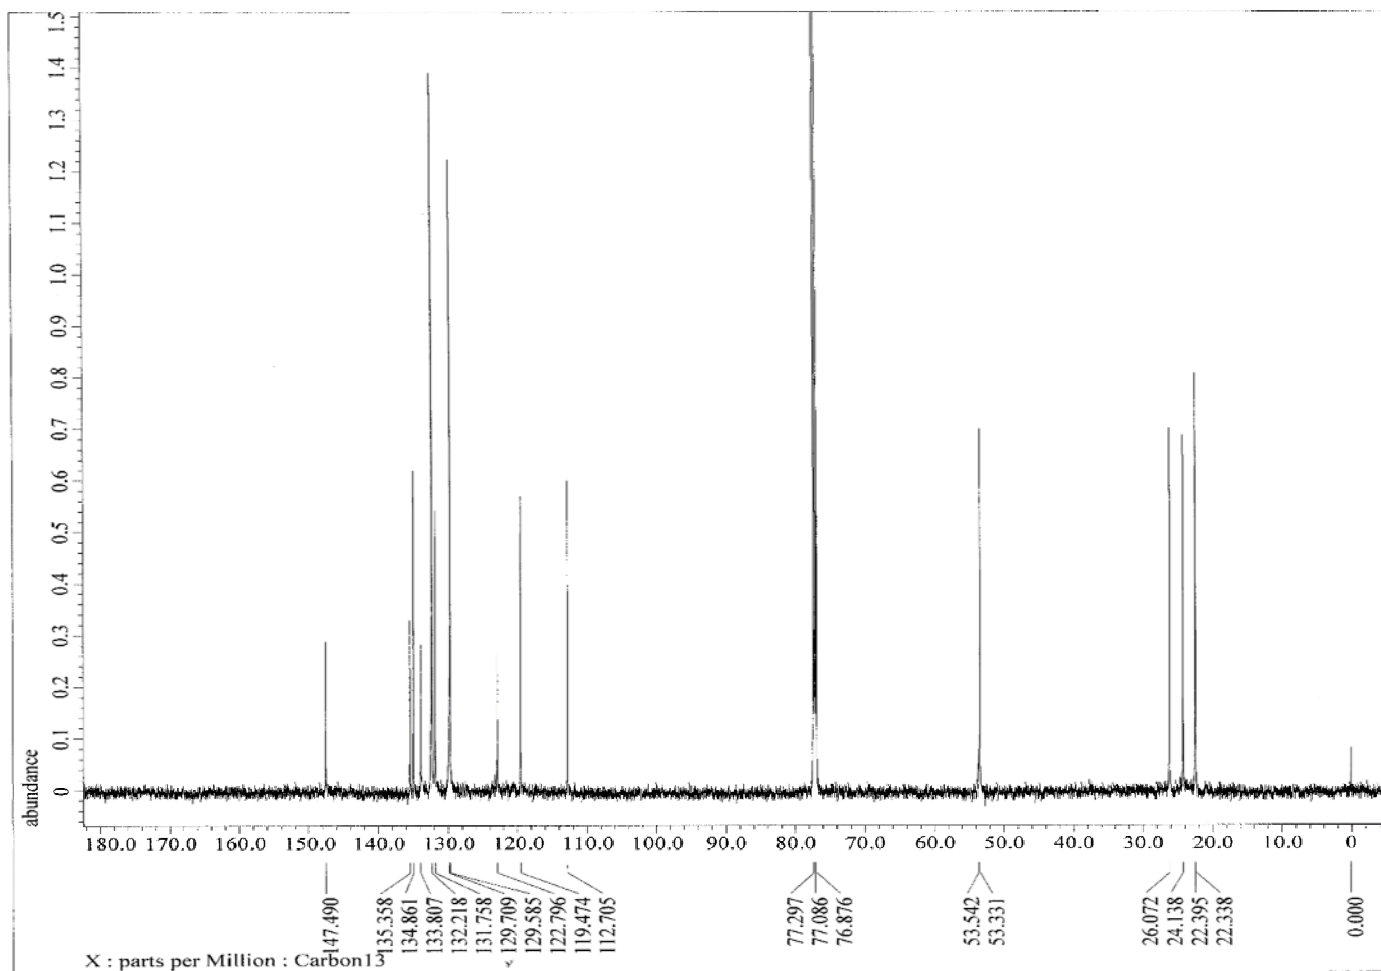



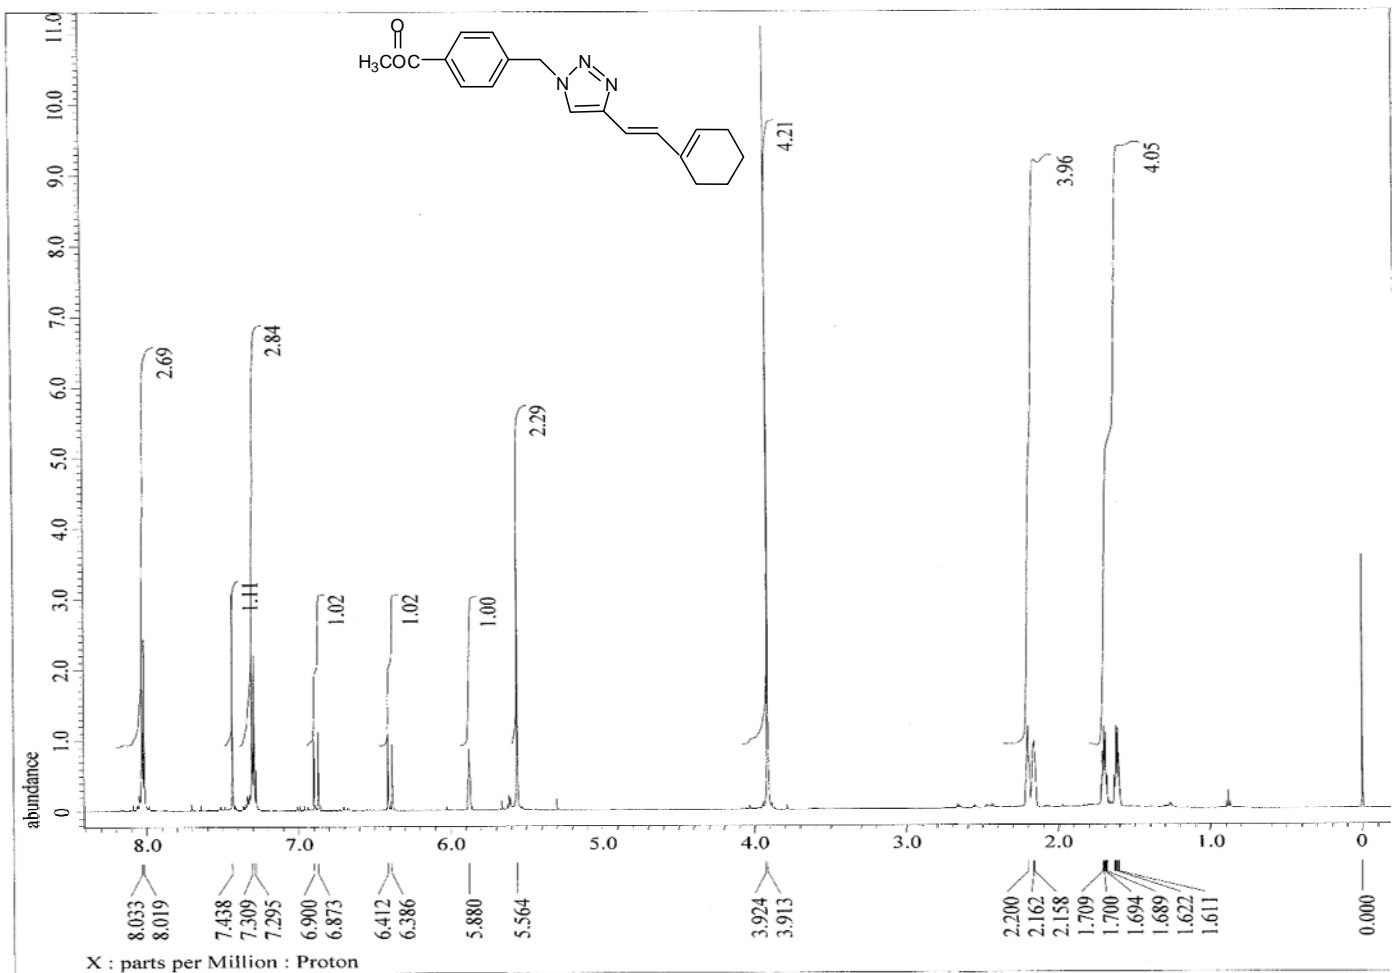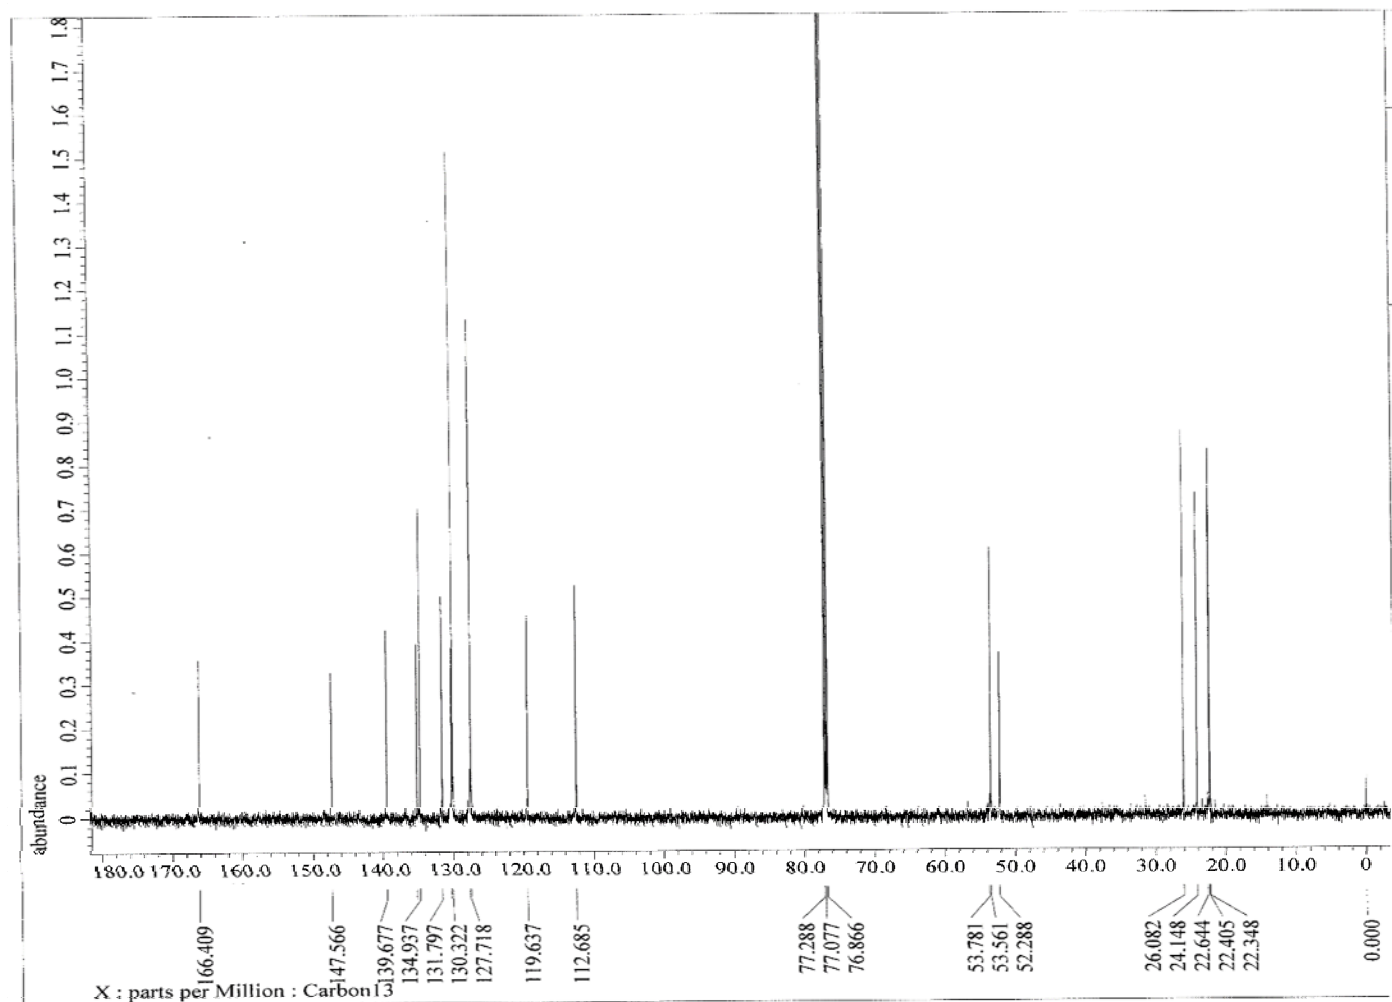

Supplement: c3ra45718d.pdf [file c3ra45718d.pdf]
